1 **Life histories and niche dynamics in late Quaternary proboscideans**  
2 **from Midwestern North America: evidence from stable isotope**  
3 **analyses**

4 Chris Widga<sup>1,2</sup>, Greg Hodgins<sup>3</sup>, Kayla Kolis<sup>4</sup>, Stacey Lengyel<sup>1,2</sup>, Jeff Saunders<sup>2,5</sup>, J. Douglas  
5 Walker<sup>6</sup>, Alan D. Wanamaker<sup>7</sup>

6

7 **Affiliations**

8 1. Don Sundquist Center of Excellence in Paleontology, East Tennessee State University,  
9 Johnson City, TN

10 2. Illinois State Museum, Springfield, IL

11 3. Department of Physics, University of Arizona, Tucson, AZ

12 4. Biodiversity Institute, University of Kansas, Lawrence, KS

13 5. The Desert Laboratory on Tumamoc Hill, University of Arizona, Tucson, AZ

14 6. Department of Geology, University of Kansas, Lawrence, KS

15 7. Department of Geological and Atmospheric Sciences, Iowa State University, Ames, IA

16

17 Key Words: Mammoths, Mastodons, Stable Isotopes, Paleoecology, Midwest, Mobility

18

19

20 **ABSTRACT**

21 Stable isotopes of mammoths and mastodons have the potential to illuminate ecological changes  
22 in late Pleistocene landscapes and megafaunal populations as these species approached  
23 extinction. The ecological factors at play in this extinction remain unresolved, but isotopes of  
24 bone collagen ( $\delta^{13}\text{C}$ ,  $\delta^{15}\text{N}$ ) and tooth enamel ( $\delta^{13}\text{C}$ ,  $\delta^{18}\text{O}$ ,  $^{87}\text{Sr}/^{86}\text{Sr}$ ) from the Midwest, USA are  
25 leveraged to examine ecological and behavioral changes that occurred during the last  
26 interglacial-glacial cycle. Both species had significant C3 contributions to their diets and  
27 experienced increasing levels of niche overlap as they approached extinction. A subset of  
28 mastodons after the last glacial maximum (LGM) exhibit low  $\delta^{15}\text{N}$  values that may represent  
29 expansion into a novel ecological niche, perhaps densely occupied by other herbivores. Stable  
30 isotopes from serial and micro-sampled enamel show increasing seasonality and decreasing  
31 temperatures as mammoths transitioned from Marine Isotope Stage (MIS) 5e to glacial  
32 conditions (MIS 4, MIS 3, MIS 2). Isotopic variability in enamel suggests mobility patterns and  
33 life histories have potentially large impacts on the interpretation of their stable isotope ecology.  
34 This study further refines the ecology of midwestern mammoths and mastodons demonstrating  
35 increasing seasonality and niche overlap as they responded to landscape changes in the final  
36 millennia before extinction.

## 37 INTRODUCTION

38 Historically, the late Quaternary record of mammoths and mastodons in the Midwest has  
39 played an important role in understanding megafaunal extinctions in North America (e.g., Fisher  
40 2008, 2018; Graham et al., 1981; Saunders et al. 2010; Widga et al., 2017a; Yansa and Adams,  
41 2012). Whether extinctions are viewed as human-induced (Mosimann and Martin 1975; Alroy  
42 2001; Surovell et al. 2005; Fisher 2009; Surovell et al. 2016), the result of late Pleistocene  
43 landscape changes (Stuart et al. 2004; Nogués-Bravo et al. 2008; Widga et al. 2017a), a function  
44 of other ecological processes (Ripple and Van Valkenburgh 2010), or some combination, this  
45 region is unparalleled in its density of large, late Quaternary vertebrates and associated  
46 paleoecological localities. For these reasons, the midcontinent has proven critical to  
47 understanding ecological dynamics in proboscidean taxa leading up to extinction. In recent years,  
48 it has been recognized that multiple proboscidean taxa shared an ecological niche in late  
49 Pleistocene landscapes (Saunders et al. 2010) despite distinct extinction trajectories (Widga et al.  
50 2017a). Chronological studies indicate that proboscideans in this region experienced extinction  
51 *in situ*, rather than mobilizing to follow preferred niche space (Saunders et al. 2010). Despite  
52 refinements in our understanding of mammoths and mastodons in the region, many significant  
53 questions remain. Modern megafauna have a profound impact on local vegetation (Guldmond  
54 and Van Aarde 2008; Valeix et al. 2011), and it is unclear what effect late Pleistocene  
55 mammoths and mastodons would have had on canopy cover, nutrient cycling, and fruit dispersal  
56 in non-analogue vegetation communities. There are still issues of equifinality in how the  
57 presence of human predators (Fisher 2009) or the virtual absence of both humans and large  
58 carnivores (Widga et al. 2017a) impacted proboscidean populations in the region as they neared  
59 extinction.

60           The high profile debate surrounding the cause of late Pleistocene megafaunal extinctions  
61 has spurred a number of productive regional studies to address the timing and paleoecology of  
62 extinction in megafaunal taxa (Pacher and Stuart 2009; Stuart and Lister 2011, 2012; Stuart  
63 2015; Widga et al. 2017a). The results of this research serve to constrain the number of possible  
64 extinction scenarios and to highlight the need for regional-scale and taxon-specific analyses.

65           As in modern ecosystems, Proboscidea in late Pleistocene North America were long-lived  
66 taxa that likely had a profound impact on the landscape around them. Due to their size and  
67 energetic requirements, elephantoids are a disruptive ecological force, promoting open canopies  
68 in forests through tree destruction (Chafota and Owen-Smith 2009) and trampling vegetation  
69 (Plumptre 1994). Their dung is a key component of soil nutrient cycling (Owen-Smith 1992;  
70 Augustine et al. 2003), and was likely even more important in N limited tundra and boreal forest  
71 systems of temperate areas during the late Pleistocene. Even in death, mammoths and mastodons  
72 probably wrought major changes on the systems within which they were interred (Coe 1978;  
73 Keenan et al. 2018) providing valuable nutrient resources to scavengers and microbial  
74 communities. Precisely because proboscideans play such varied and important roles in the  
75 ecosystems they inhabit, they are good study taxa to better understand Pleistocene ecosystems.  
76 They are also central players in many extinction scenarios.

77           One of the major challenges to ecological questions such as these is scale (Delcourt and  
78 Delcourt 1991; Denny et al. 2004; Davis and Pineda-Munoz 2016). Processes that are acting at  
79 the level of an individual or a locality can vary significantly in space and time (Table 1).  
80 Paleoecological data collected from individual animals from local sites is constrained by larger  
81 regional patterns that may or may not be apparent (e.g., taphonomic contexts, predator-prey  
82 dynamics). Paleoecological studies of vertebrate taxa often begin with the premise that the

83 individual is an archive of environmental phenomena experienced in life. In long-lived taxa such  
84 as proboscideans, this window into past landscapes may span many decades. This longevity is  
85 both a benefit and a challenge to studies of proboscidean paleoecology.

86 Table 1. Scales of paleoecological analysis.

| Scale                      | Method                                      | Phenomena                                                                                                               | Selected References                                                                                                  |
|----------------------------|---------------------------------------------|-------------------------------------------------------------------------------------------------------------------------|----------------------------------------------------------------------------------------------------------------------|
| Small<br>(Days)            | Stomach contents, enamel micro-wear         | Animal health, Landscape (local scale)                                                                                  | Rhodes et al. 1998; Teale and Miller 2012; Green, DeSantis, and Smith 2017; Smith and DeSantis 2018.                 |
| Meso<br>(Weeks-Months)     | Hair, Tusk/Tooth dentin, Tooth enamel       | Seasonal diets, Reproductive events (e.g., musth, calving), Migration/Dispersal                                         | Fox and Fisher 2001; Hoppe 2004; Hoppe and Koch 2007; Cerling et al. 2009; Metcalfe and Longstaffe 2012; Fisher 2018 |
| Large<br>(Years - Decades) | Bone collagen, tooth enamel, tooth mesowear | Climate/Vegetation trends, Large-scale land-use trends, Population-level trends in diet responses to landscape changes. | Bocherens et al. 1996; Iacumin et al. 2010; Szpak et al. 2010                                                        |

87  
88 Some approaches offer relatively high-resolution snapshots of animal ecology at a scale  
89 that is of a short duration (days). Micro-wear analyses of dentin and enamel (Green et al. 2017;  
90 Smith and DeSantis 2018) are increasingly sophisticated, and have the potential to track short-  
91 term dietary trends. The remains of stomach contents also provide ecological information at this  
92 scale (Lepper et al. 1991; Newsom and Mithlbackler 2006; van Geel et al. 2011; Fisher et al.  
93 2012; Teale and Miller 2012; Birks et al. 2019), which are essentially the ‘last meal’ representing  
94 a few hours of individual browsing. These techniques offer paleoecological insights that are  
95 minimally time-averaged, and at a timescale that may be comparable to modern observations of  
96 animal behavior.

97 Other approaches resolve time periods that are weeks to months in duration. Fisher’s  
98 (Fisher and Fox 2006; Fisher 2009; 2018) work on incremental growth structures in  
99 proboscidean tusk and molar dentin reliably record weekly to monthly behaviors. The resolution

100 of these methods may even include short-term, often periodic, life history events, such as  
101 reproductive competition (musth) and calving. Other researchers (Hoppe et al. 1999; Metcalfe  
102 and Longstaffe 2012; 2014; Pérez-Crespo et al. 2016) have explored incremental growth trends  
103 in proboscidean tooth enamel. Adult molars form over the course of 10-12 years with an enamel  
104 extension rate of ~1 cm/year in both modern elephants (Uno et al. 2013) and mammoths (Dirks  
105 et al. 2012; Metcalfe and Longstaffe 2012) providing the opportunity to understand meso-scale  
106 (potentially monthly) changes in diet and behavior.

107 Finally, some techniques measure animal diet and behavior over much longer scales  
108 (years-decades). In humans, bone collagen is replaced at a rate of 1.5-4% per year (Hedges et al.  
109 2007). For equally long-lived proboscidean taxa, this means that stable isotope analyses of bone  
110 collagen is essentially sampling a moving average of ~20 years of animal growth. For younger  
111 age groups, this average will be weighted towards time periods of accelerated maturation  
112 (adolescence), when collagen is replaced at a much greater rate (Hedges et al. 2007). Tooth  
113 enamel can also be sampled at a resolution (i.e., “Bulk” enamel) that averages a year (or more) of  
114 growth (Hoppe 2004; Baumann and Crowley 2015), and it is likely that this is the approximate  
115 temporal scale that is controlling tooth mesowear (Fortelius and Solounias 2000).

116 Stable isotope studies are an important part of the paleoecological toolkit for  
117 understanding Quaternary proboscideans and are capable of resolving animal behavior at  
118 multiple timescales. Progressively larger, more complete datasets characterize isotopic studies of  
119 Beringian mammoths, where stable carbon and oxygen isotopes in bone collagen and tooth  
120 enamel reliably track climate and landscape changes over the late Pleistocene (Bocherens et al.  
121 1996; Iacumin et al. 2010; Szpak et al. 2010; Arppe et al. 2019), the place of mammoths in

122 regional food webs (Fox-Dobbs et al. 2007, 2008), and characteristics of animal growth and  
123 maturation (Metcalf and Longstaffe 2012; Rountrey et al. 2012; El Adli et al. 2017).

124         These studies have also been important to understanding both lineages of proboscideans  
125 in temperate North America. From the West Coast (Coltrain et al. 2004; El Adli et al. 2015) to  
126 the southwestern (Metcalf et al. 2011), and eastern US (Koch et al. 1998; Hoppe and Koch  
127 2007), isotopic approaches have been very successful in understanding local to regional scale  
128 behavior in mammoths and mastodons. Although there have been efforts to understand  
129 mammoth and mastodon behaviors in the Midwest at relatively limited geographic scales  
130 (Saunders et al. 2010; Baumann and Crowley 2015), there is a need to systematically address  
131 long-term isotopic trends throughout the region. In this paper, we approach this problem from a  
132 broad regional perspective, leveraging a recently reported radiocarbon ( $^{14}\text{C}$ ) dataset with  
133 associated isotopic data on bone collagen. We also utilize an enamel dataset consisting of both  
134 serial bulk and micro-milled mammoth molar enamel samples (C, O, Sr isotope systems).  
135 Together, the results of these analyses offer a picture of mammoth and mastodon diets ( $\delta^{13}\text{C}$ ,  
136  $\delta^{15}\text{N}$ ), late Quaternary paleoclimate ( $\delta^{18}\text{O}$ ), and animal mobility ( $^{87}\text{Sr}/^{86}\text{Sr}$ ) that is geographically  
137 comprehensive and spans the past 50,000 years.

## 138 **MATERIALS AND METHODS**

139         The proboscidean dataset in this study (Figure 1; SM Table 1, SM Table 2, SM Table 3)  
140 was acquired with the goal of understanding mammoth and mastodon population dynamics  
141 during the late Pleistocene as these taxa approach extinction. Chronological and broad-scale  
142 paleoecological implications for this dataset were explored in Widga et al. (2017a) and more  
143 recently in Broughton and Weitzel (2018). In this paper we focus on the implications of these

144 data for the stable isotope ecology of midwestern Proboscidea. We also discuss annual patterns  
145 in five serially sampled mammoth teeth spanning the last glacial-interglacial cycle. Finally, we  
146 micro-sampled two mammoths from the Jones Spring locality in Hickory Co., MO. Although  
147 beyond the range of radiocarbon dating, both samples are associated with well-dated  
148 stratigraphic contexts (Haynes 1985). Specimen 305JS77 is an enamel ridge-plate recovered  
149 from unit d1 (spring feeder), refitting to an M3 from unit c2 (lower peat). Unit c2 is part of the  
150 lower Trolinger formation (Haynes 1985) and can be assigned to Marine Isotope Stage (MIS) 4.  
151 Specimen 64JS73 is an enamel ridge-plate from unit e2 (sandy peat) in the upper Trolinger  
152 formation (Haynes 1985) and can be assigned to MIS 3. Together, these samples provide dozens  
153 of seasonally-calibrated isotopic snapshots representing mammoth behavior from individuals that  
154 pre-date the last glacial maximum (LGM).

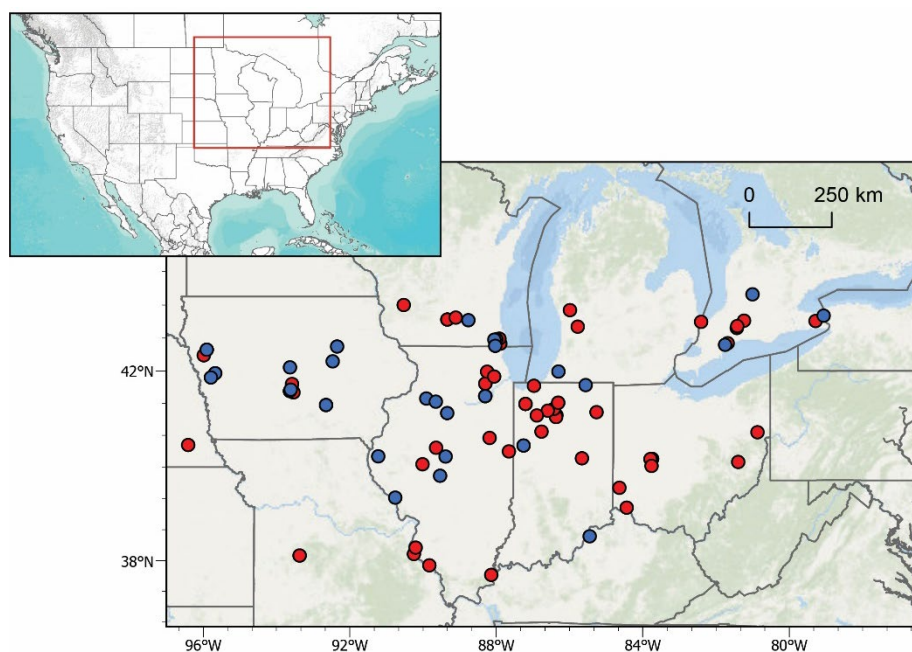

155  
156 Figure 1. Map of dated midwestern mammoths (blue) and mastodons (red) with associated  
157  $\delta^{13}\text{C}_{\text{coll}}$  and  $\delta^{15}\text{N}_{\text{coll}}$  data. See SM Table 2 for details.



158

159           Mammoth and Mastodon bone collagen. Proboscidean samples were selected to widely  
160 sample midwestern Proboscidea, both stratigraphically and geographically (Widga et al. 2017a).  
161 Due to extensive late Pleistocene glaciation in the region, this dataset is dominated by samples  
162 dating to the LGM or younger (<22 ka). Only 14 out of 93 (15%) localities predate the LGM.

163           All samples were removed from dense bone, tooth or tusk dentin and submitted to the  
164 University of Arizona AMS laboratory. Collagen was prepared using standard acid-base-acid  
165 techniques (Brock et al. 2010), its quality evaluated visually, and through ancillary  
166 Carbon:Nitrogen (C:N) analyses. Visually, well-preserved collagen had a white, fluffy  
167 appearance and C:N ratios within the range of modern bones (2.9-3.6) (Tuross et al. 1988).  
168 Samples outside of this range were not included in the study. Samples that had the potential to be  
169 terminal ages were subjected to additional analyses where the ABA-extracted gelatin was ultra-  
170 filtered (UF) through >30 kD syringe filters to isolate relatively undegraded protein chains  
171 (Higham et al. 2006). This fraction was also dated. All radiocarbon ages in this dataset are on  
172 collagen from proboscidean bone or tooth dentin and available in Widga et al. (2017a), through  
173 the Neotoma Paleoecology Database ([www.neotomadb.org](http://www.neotomadb.org)) or in SM Table 1. Measured  
174 radiocarbon ages were calibrated in Oxcal v4.3 (Bronk Ramsey 2009) using the Intcal13 dataset  
175 (Reimer et al. 2013). All stable isotope samples were analyzed on a Finnigan Delta PlusXL  
176 continuous-flow gas-ratio mass spectrometer coupled to a Costech elemental analyzer at the  
177 University of Arizona. Standardization is based on acetanilide for elemental concentration, NBS-  
178 22 and USGS-24 for  $\delta^{13}\text{C}$ , and IAEA-N-1 and IAEA-N-2 for  $\delta^{15}\text{N}$ . Isotopic corrections were  
179 done using a regression method based on two isotopic standards. The long-term analytical  
180 precision (at  $1\sigma$ ) is better than  $\pm 0.1\text{‰}$  for  $\delta^{13}\text{C}$  and  $\pm 0.2\text{‰}$  for  $\delta^{15}\text{N}$ . All  $\delta^{13}\text{C}$  results are

181 reported relative to Vienna Pee Dee Belemnite (VPDB) and all  $\delta^{15}\text{N}$  results are reported relative  
182 to N-Air.

183 Serial and Micro-sampling of Mammoth tooth enamel. Mammoth enamel ridge-plates  
184 were sampled at two different scales. Serial sampling consisted of milling a series of 5-10 mg  
185 samples of enamel powder with a handheld rotary tool equipped with a 1.5 mm diameter carbide  
186 bit along the axis of growth. Sample spacing was ~1 sample per centimeter of tooth growth.  
187 However, given the geometry and timing of enamel maturation (Dirks et al. 2012), these samples  
188 at best, approximate an annual scale of dietary and water inputs.

189 Micro-sampling however, has the potential to record sub-annual patterns in animal  
190 movement and behavior (Metcalf and Longstaffe 2012). For this project, we built a custom  
191 micromill capable of *in situ*, micron-resolution, vertical sampling of a complete mammoth molar.  
192 This micromill setup consisted of two Newmark linear stages coupled to a Newmark vertical  
193 stage to allow movement in 3-dimensions. These stages were controlled by a Newmark NSC-G  
194 3-axis motion controller using GalilTools on a PC. A 4-cm diameter ball joint allowed levelling  
195 of a metal (Version 1) or acrylic (Version 2) plate for holding a specimen. The armature for  
196 Version 1 consisted of a 1971 Olympus Vanox microscope retrofitted with a stationary Proxxon  
197 50/E rotary tool using a 0.5mm end mill. Version 2 has replaced this setup with a U-strut  
198 armature using a 3D printed drill mount to allow for greater vertical and horizontal movement to  
199 accommodate large, organically-shaped specimens. Specimens were stabilized on the mounting  
200 plate using heat-flexible thermoplastic cradle affixed to a metal plate with machine screws  
201 (Version 1). However, we later developed an acrylic mounting plate method where a mammoth  
202 tooth could be sufficiently stabilized using zip ties (Version 2). This micromill was developed to  
203 address the challenges of accurately micro-milling large specimens with minimal instrumentation

204 costs. Complete plans for this micromill are available under an open hardware license at  
205 [https://osf.io/8uhqd/?view\\_only=43b4242623a94a529e4c6ef2396345e9](https://osf.io/8uhqd/?view_only=43b4242623a94a529e4c6ef2396345e9).

206 Micro-mill sampling resolution was 1 sample per millimeter along the growth axis of the  
207 tooth plate (Figure 2). Each sample was milled in 100 $\mu$ m-deep passes through the entire  
208 thickness of the enamel. The lowest enamel sample (i.e., closest to the enamel-dentin boundary)  
209 in the series was used for isotopic analyses to minimize the effects of mineralization and  
210 diagenesis on the biological signal (Zazzo et al. 2006). Enamel powder was collected in de-  
211 ionized water to; 1) maximize sample recovery, and 2) lubricate the mill. These samples were  
212 too small for standard pretreatment of tooth enamel CO<sub>3</sub> (Koch et al. 1997). However, paired  
213 bulk enamel samples treated with 0.1 N acetic acid and 2.5% NaOCl show results that are the  
214 same as untreated bulk samples. Although this technique is both time- and labor- intensive, it is  
215 minimally invasive and is capable of sampling enamel growth structures at high resolution.

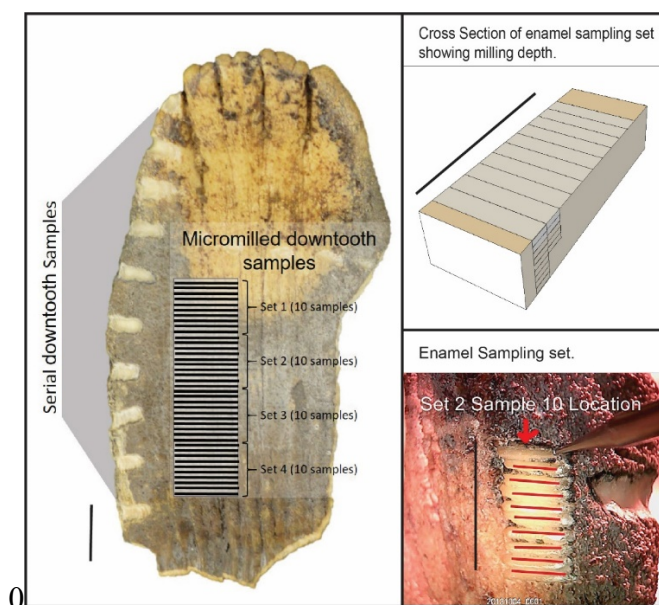

216  
217 Figure 2. Schematic illustration of serial and micro-sampling strategies. Black bar is  
218 equal to 1 cm.

219 All enamel powder samples were measured in a Finnigan Delta Plus XL mass  
220 spectrometer in continuous flow mode connected to a Gas Bench with a CombiPAL autosampler  
221 at the Iowa State University Stable Isotope lab, Department of Geological and Atmospheric  
222 Sciences. Reference standards (NBS-18, NBS-19) were used for isotopic corrections, and to  
223 assign the data to the appropriate isotopic scale. Corrections were done using a regression  
224 method using NBS-18 and NBS-19. Isotope results are reported in per mil (‰). The long-term  
225 precision (at  $1\sigma$ ) of the mass spectrometer is  $\pm 0.09\text{‰}$  for  $\delta^{18}\text{O}$  and  $\pm 0.06\text{‰}$  for  $\delta^{13}\text{C}$ ,  
226 respectively, and precision is not compromised with small carbonate samples (~150  
227 micrograms). Both  $\delta^{13}\text{C}$  and  $\delta^{18}\text{O}$  are reported VPDB.

228 Enamel  $\delta^{13}\text{C}$  results are corrected -14.1‰ to approximate the  $\delta^{13}\text{C}$  of dietary input  
229 ( $\delta^{13}\text{C}_{\text{diet}}$ ) (Daniel Bryant and Froelich 1995).

230 Enamel  $\delta^{18}\text{O}$  results were converted from VPDB to SMOW using the equation:

$$231 \quad \delta^{18}\text{O SMOW} = (1.03086 * \delta^{18}\text{O VPDB}) + 30.86$$

232 The  $\delta^{18}\text{O}$  of enamel phosphate ( $\delta^{18}\text{O}_p$ ) for these samples was calculated from the  $\delta^{18}\text{O}$  of enamel  
233 carbonate ( $\delta^{18}\text{O}_c$ ) (Fox and Fisher 2001)

$$234 \quad \delta^{18}\text{O}_p = (\delta^{18}\text{O}_c / 1.106) - 4.7288$$

235 Estimates of body water  $\delta^{18}\text{O}$  ( $\delta^{18}\text{O}_w$ ) were calculated following Dauxe et al. (2008)

$$236 \quad \delta^{18}\text{O}_w = (1.54 * \delta^{18}\text{O}_p) - 33.72 \text{ (Dauxe et al. 2008)}$$

237 The  $^{87}\text{Sr}/^{86}\text{Sr}$  component of enamel bioapatite reflects changes in the geochemical  
238 makeup of the surface an animal grazed across during tooth formation. In serial-scale analyses,

239 enamel powder samples were split from the light isotope samples described above, and represent  
240 the same portions of mammoth teeth. Each ~5 mg sample of powder was leached in 500  $\mu$ L 0.1  
241 N acetic acid for four hours to remove diagenetic calcite and rinsed 3 times with deionized water  
242 (centrifuging between each rinse). In the micromilled series, small sample sizes prevented Sr  
243 analyses from being performed on the same samples as  $\delta^{13}\text{C}$  and  $\delta^{18}\text{O}$  analyses. Therefore, Sr  
244 from these growth series was analyzed opportunistically, or at the scale of 1 sample every 2mm.

245 All enamel samples were then dissolved in 7.5 N  $\text{HNO}_3$  and the Sr eluted through ion-  
246 exchange columns filled with strontium-spec resin at the University of Kansas Isotope  
247 Geochemistry Laboratory.  $^{87}\text{Sr}/^{86}\text{Sr}$  ratios were measured on a Thermal Ionization Mass  
248 Spectrometer (TIMS), an automated VG Sector 54, 8-collector system with a 20-sample turret, at  
249 the University of Kansas Isotope Geochemistry laboratory. Isotope ratios were adjusted to  
250 correspond to a value of 0.71250 on NBS-987 for  $^{87}\text{Sr}/^{86}\text{Sr}$ . We also assumed a value of  $^{86}\text{Sr}/^{88}\text{Sr}$   
251 of 0.1194 to correct for fractionation.

252 The distribution of  $^{87}\text{Sr}/^{86}\text{Sr}$  values in vegetation across the surface of the midcontinent is  
253 determined by the values of soil parent material. In a large part of this region, surface materials  
254 are composed of allochthonous Quaternary deposits such as loess, alluvium, and glacial debris.  
255 Therefore continent-scale Sr isoscape models derived from bedrock or water (Bataille and  
256 Bowen 2012) are not ideal for understanding first order variability in midwestern  $^{87}\text{Sr}/^{86}\text{Sr}$ . For  
257 these reasons, Widga et al. (2017) proposed a Sr isoscape for the Midwest based on surface  
258 vegetation. At a regional scale, these trends in vegetation  $^{87}\text{Sr}/^{86}\text{Sr}$  reflect the Quaternary history  
259 of the region, and are consistent with other, empirically derived, patterns in Sr isotope  
260 distribution from the area (Slater et al. 2014; Hedman et al. 2018). Sr isotope values in mammoth

261 enamel are compared to a  $^{87}\text{Sr}/^{86}\text{Sr}$  isoscape constructed from the combined datasets of Widga et  
262 al. (2017b) and Hedman et al. (2009), and Hedman et al. (2018).

## 263 **RESULTS**

264 The collagen of 54 mastodons and 22 mammoths was analyzed for  $\delta^{13}\text{C}_{\text{coll}}$  and  $\delta^{15}\text{N}_{\text{coll}}$   
265 (Table 2). Three mastodons have  $^{14}\text{C}$  ages that place them beyond the range of radiocarbon  
266 dating, and the youngest mastodons date to the early part of the Younger Dryas, shortly before  
267 extinction. Despite being well-represented prior to the LGM and during deglaciation (i.e., Oldest  
268 Dryas, Bølling, Allerød, Younger Dryas), this dataset lacks mastodons from the study region  
269 during the coldest parts of the LGM. Mammoths are present in this dataset from 40 ka until their  
270 extinction in the region during the late Allerød.

271 Visually, there is substantial amounts of overlap in the  $\delta^{13}\text{C}_{\text{coll}}$  and  $\delta^{15}\text{N}_{\text{coll}}$  of mammoths  
272 and mastodons through the duration of the dataset (Figure 3, Table 2). Both taxa show average  
273  $\delta^{13}\text{C}_{\text{coll}}$  values around -20‰, consistent with a diet dominated by C3 trees, shrubs, and/or cool-  
274 season grasses. This is broadly consistent with variable, but shared diets during time periods  
275 when both taxa occupied the region. The average  $\delta^{13}\text{C}_{\text{coll}}$  values for mammoths (-20.4‰) is  
276 similar to that of mastodons (-21.0‰). The average  $\delta^{15}\text{N}_{\text{coll}}$  of mammoths (7.5‰) is elevated  
277 compared to mastodons (4.4‰).

278 However, dietary relationships between taxa are not static through time. Prior to the  
279 LGM, both  $\delta^{13}\text{C}_{\text{coll}}$  and  $\delta^{15}\text{N}_{\text{coll}}$  are significantly different between mammoths and mastodons  
280 ( $\delta^{13}\text{C}$  t-test;  $p=0.013$ ;  $\delta^{15}\text{N}$  t-test;  $p=0.010$ ). During the Oldest Dryas the  $\delta^{13}\text{C}_{\text{coll}}$  of both taxa is  
281 very similar, although  $\delta^{15}\text{N}_{\text{coll}}$  between mammoths and mastodons remains distinct (t-test;  
282  $p=0.012$ ). During the Allerød,  $\delta^{13}\text{C}_{\text{coll}}$  and  $\delta^{15}\text{N}_{\text{coll}}$  between taxa are indistinguishable.

283           The  $\delta^{13}\text{C}_{\text{coll}}$  signature of mastodon diets changes little throughout the last 50 ka. Despite a  
284 noticeable absence of mastodon material during the height of the LGM, the only significant shift  
285 in the  $\delta^{13}\text{C}_{\text{coll}}$  of mastodon diets occurs between the Bølling and the Allerød (t-test;  $p=0.008$ ).

286           Mastodon  $\delta^{15}\text{N}_{\text{coll}}$  values fall clearly into two groups, those that date prior to the LGM,  
287 and those that post-date the LGM. Mastodon  $\delta^{15}\text{N}_{\text{coll}}$  values are significantly higher in pre-LGM  
288 samples than in samples dating to the Younger Dryas (t-test;  $p=0.010$ ), Allerød (t-test;  $p=0.017$ ),  
289 and Bølling (t-test;  $p<0.000$ ). Of note is a group of mastodons that show lower  $\delta^{15}\text{N}_{\text{coll}}$  values  
290 during the Oldest Dryas, Bølling, Allerød, and Younger Dryas, when the average  $\delta^{15}\text{N}_{\text{coll}}$  values  
291 decrease to values  $<5\text{‰}$ . A similar shift is not evident in mammoths at this time.

292           Mammoth  $\delta^{13}\text{C}_{\text{coll}}$  during MIS 3 is significantly different from mammoths dating to LGM  
293 II (t-test;  $p=0.008$ ) or the Oldest Dryas (t-test;  $p=0.005$ ). There are no significant differences in  
294 mammoth  $\delta^{15}\text{N}_{\text{coll}}$  between different time periods.

295

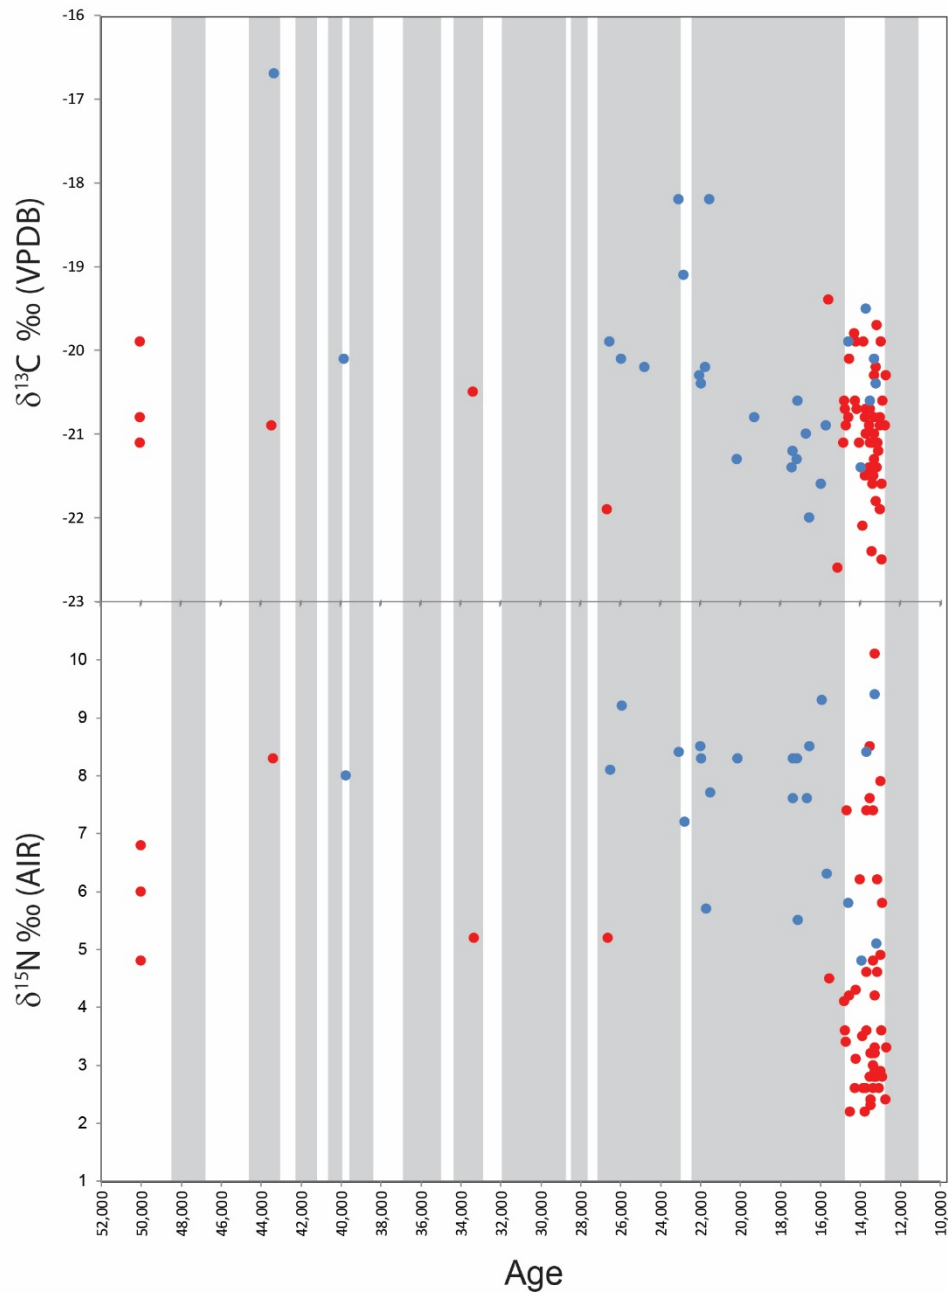

296

297

Figure 3. Changes in midwestern proboscidean collagen  $\delta^{13}\text{C}$  and  $\delta^{15}\text{N}$  through time.

298

Mastodons=red, Mammoths=blue, glacial stadials = grey bars. Stadal chronology from

299

Rasmussen et al., 2014.

300

301



302 Table 2. Mastodon and Mammoth collagen stable isotope values, by chronozone.  $\delta^{13}\text{C}$  values  
 303 reported as ‰ relative to VPDB.  $\delta^{15}\text{N}$  values reported as ‰ relative to Air.

| Taxon            | Chronozone                   | N  | $\bar{x} \delta^{13}\text{C}$ (s.d) | $\bar{x} \delta^{15}\text{N}$ (s.d) |
|------------------|------------------------------|----|-------------------------------------|-------------------------------------|
| <i>Mammot</i>    | Younger Dryas (12.9-11.5 ka) | 2  | -20.6 (0.4)                         | 2.9 (0.6)                           |
|                  | Allerød (14.0-12.9 ka)       | 35 | -21.1 (0.6)                         | 4.2 (2.1)                           |
|                  | Bølling (14.6-14.0 ka)       | 6  | -20.4 (0.5)                         | 3.8 (1.5)                           |
|                  | Oldest Dryas (14.6-17.4 ka)  | 5  | -20.5 (0.7)                         | 4.6 (1.6)                           |
|                  | LGM II (17.4-20.9 ka)        | 0  |                                     |                                     |
|                  | LGM I (20.9-22.9 ka)         | 0  |                                     |                                     |
|                  | Pre-LGM (>22.9 ka)           | 6  | -20.9 (0.7)                         | 6.1 (1.3)                           |
|                  | Average                      | 54 | -21.0 (0.7)                         | 4.4 (2.0)                           |
| <i>Mammuthus</i> | Allerød (14.0-12.9 ka)       | 3  | -20.6 (0.9)                         | 6.1 (2.0)                           |
|                  | Bølling (14.6-14.0 ka)       | 1  | -19.9                               | 5.8                                 |
|                  | Oldest Dryas (14.6-17.4 ka)  | 4  | -21.4 (0.5)                         | 7.9 (1.3)                           |
|                  | LGM II (17.4-20.9 ka)        | 4  | -21.1 (0.4)                         | 7.4 (1.3)                           |
|                  | LGM I (20.9-22.9 ka)         | 5  | -20.1 (1.1)                         | 7.6 (1.2)                           |
|                  | Pre-LGM (>22.9 ka)           | 5  | -19.6 (0.8)                         | 8.2 (0.7)                           |
|                  | Average                      | 22 | -20.4 (1.0)                         | 7.5 (1.3)                           |

304 \*  $\bar{x}$  = mean; s.d. = standard deviation

305

306 All serial enamel series were between 9 and 16 cm in length and represent multiple years.

307 Stable oxygen isotopes of three MIS 2 mammoths (Principia College, Brookings, Schaeffer)

308 overlap significantly, while MIS 4 (234JS75) and MIS 5e (232JS77) mammoths from Jones

309 Spring show elevated values indicative of warmer conditions (Table 3; Figure 4). The variance in

310 serially sampled MIS 2 mammoths (average amp. = 2.5‰) was not significantly different from

311 the series from Jones Spring, dating to MIS 4 (amp. = 2.9‰)(F-test; p=0.320). However, the MIS

312 5e mammoth from Jones Spring has a smaller amplitude (amp. = 1.1‰) compared to both the

313 MIS 4 mammoth (F-test; p=0.003) and the three MIS 2 mammoths (F-test; p<0.000). Strontium

314 isotope ratios of this animal indicates a home range on older surfaces of the Ozarks, throughout

315 tooth formation, with a period of relatively elevated  $^{87}\text{Sr}/^{86}\text{Sr}$  values also corresponding to low

316  $\delta^{18}\text{O}$  values.

317 Table 3. Summary of serial and micro-sampled *Mammuthus* tooth enamel:  $\delta^{13}\text{C}$ ,  $\delta^{18}\text{O}$ , and  
 318  $^{87}\text{Sr}/^{86}\text{Sr}$ .

| ID                                  | $\delta^{13}\text{C}$ |       |       |     | $\delta^{18}\text{O}$ |       |      |      | $^{87}\text{Sr}/^{86}\text{Sr}$ |        |        |         |
|-------------------------------------|-----------------------|-------|-------|-----|-----------------------|-------|------|------|---------------------------------|--------|--------|---------|
|                                     | X                     | Min   | Max   | Amp | X                     | Min   | Max  | Amp  | X                               | Min    | Max    | Amp     |
| Principia College (MIS 2)           | -10.9                 | -11.3 | -10.0 | 1.4 | -7.9                  | -8.7  | -6.7 | 2.0  |                                 |        |        |         |
| Brookings Mammoth (MIS 2)           | -9.9                  | -10.5 | -9.4  | 1.1 | -9.2                  | -10.0 | -7.8 | 2.2  |                                 |        |        |         |
| Schaefer Mammoth (MIS 2)            | -9.0                  | -9.9  | -7.0  | 3.0 | -8.3                  | -9.9  | -6.6 | 3.3  |                                 |        |        |         |
| Jones Sp. Mammoth, 243JS75 (MIS 4)  | -1.7                  | -2.3  | -0.2  | 2.1 | -3.4                  | -4.5  | -1.6 | 2.9  |                                 |        |        |         |
| Jones Sp. Mammoth, 232JS77 (MIS 5e) | -2.8                  | -3.8  | -1.3  | 2.5 | -0.5                  | -4.6  | 3.6  | 1.1  | 0.7162                          | 0.7146 | 0.7177 | -0.0031 |
| <b>Micro-Analyses</b>               |                       |       |       |     |                       |       |      |      |                                 |        |        |         |
| 305JS77 (MIS 5e)                    | -2.4                  | -3.5  | -0.2  | 3.3 | -3.9                  | -4.9  | -2.9 | 2.0  | 0.7109                          | 0.7106 | 0.7118 | -0.0012 |
| 64JS73 (MIS 3)                      | -2.8                  | -4.3  | -1.7  | 2.6 | -4.9                  | -12.0 | -0.4 | 11.7 | 0.7152                          | 0.7140 | 0.7164 | -0.0025 |

319

320 Two mammoth teeth from the Jones Spring locality in Hickory Co., MO were micro-  
 321 sampled (Figure 5). These specimens are from beds representative of MIS 5e and MIS 3  
 322 deposits.

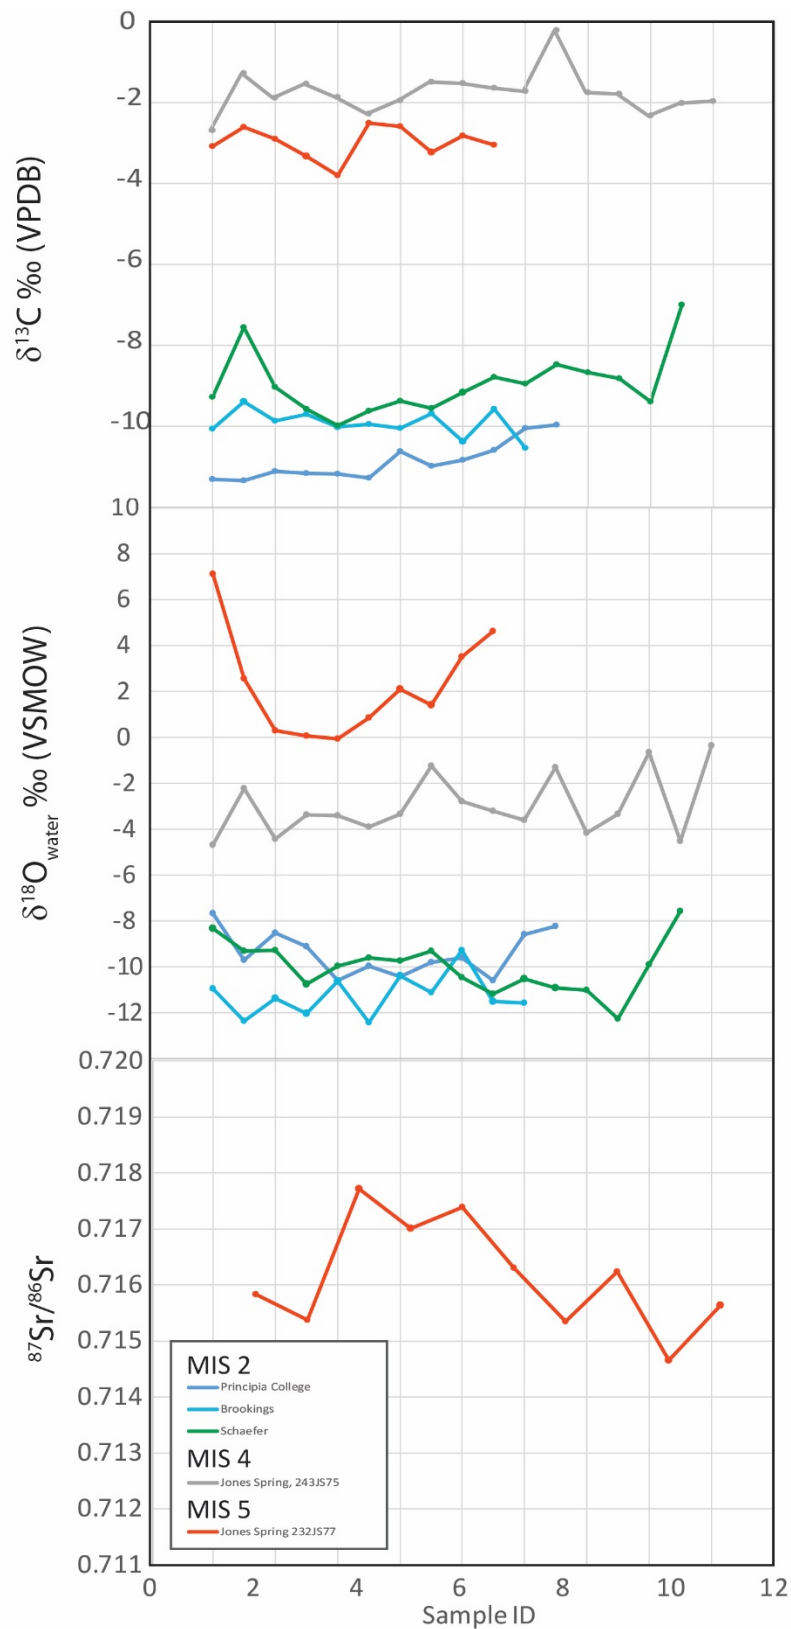

323

324

Figure 4. Time series, serial enamel  $\delta^{13}\text{C}$ ,  $\delta^{18}\text{O}$ ,  $^{87}\text{Sr}/^{86}\text{Sr}$ .

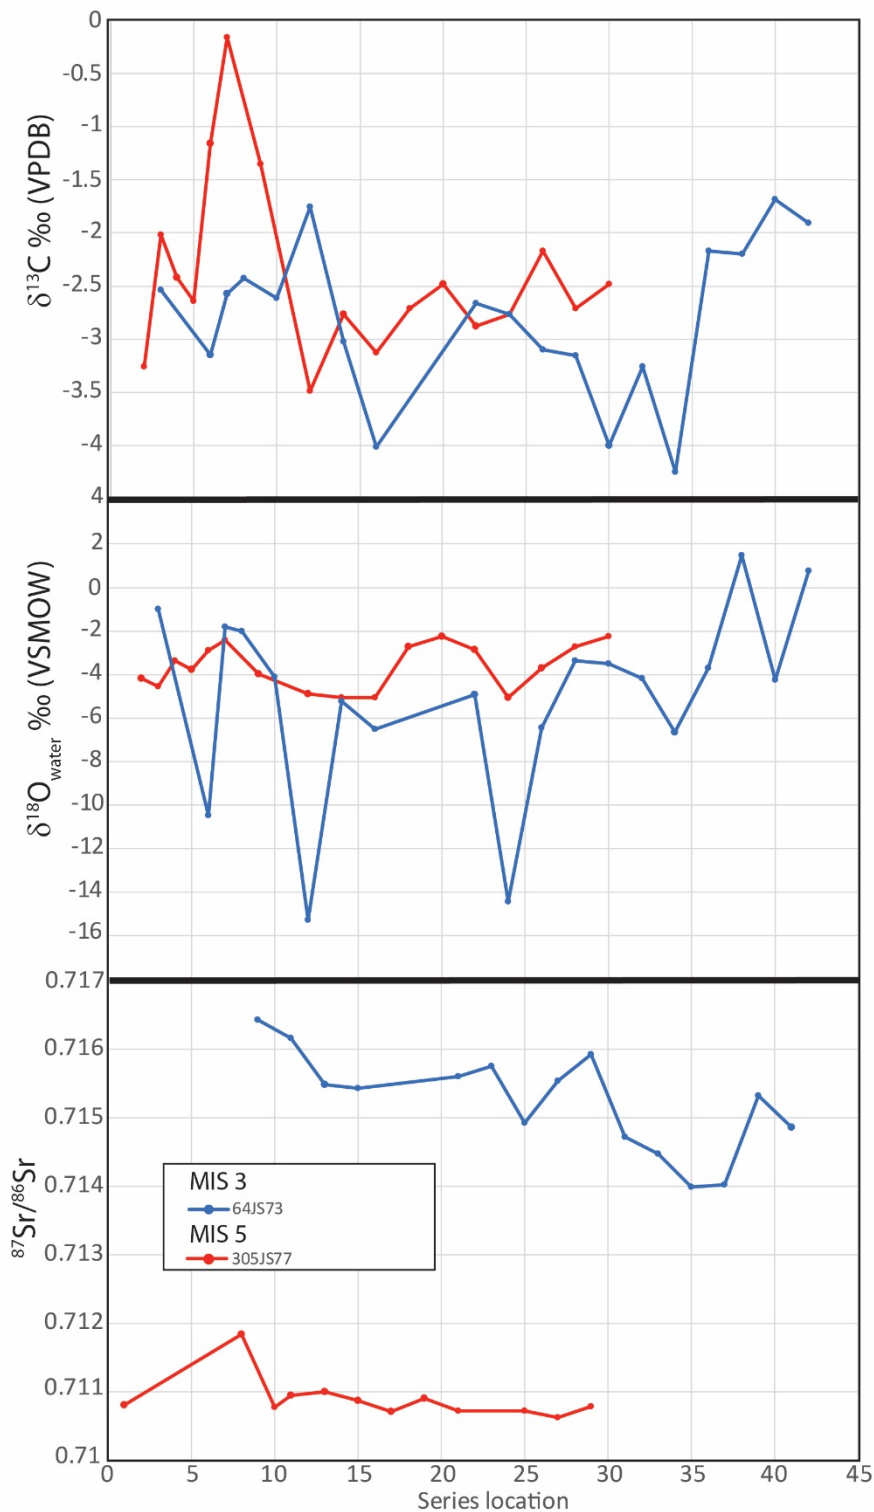

325

326

Figure 5. Time series, micro-sampled enamel  $\delta^{13}\text{C}$ ,  $\delta^{18}\text{O}$ ,  $^{87}\text{Sr}/^{86}\text{Sr}$ . Both specimens are

327

from Jones Spring, Hickory County, Missouri.

328

329           The MIS 3 molar (64JS73) shows regular negative excursions in  $\delta^{18}\text{O}$  values suggestive  
330 of seasonal temperature changes in ingested water. These excursions are relatively short-lived  
331 and extreme. Seasonal variation in enamel growth rate and maturation may account for the  
332 perceived short length of these periods. Maximum  $\delta^{18}\text{O}$  values in both mammoths are similar  
333 however; the MIS 5e mammoth lacks these negative excursions and exhibits values that are more  
334 complacent through the length of the tooth.

335           The  $\delta^{13}\text{C}$  series from both molars indicate these mammoths experienced a C4 diet  
336 throughout the year. However, deep dips in the  $\delta^{18}\text{O}$  series of the MIS 3 molar also correspond to  
337 at least two temporary peaks in the  $\delta^{13}\text{C}$  series.

338           The  $^{87}\text{Sr}/^{86}\text{Sr}$  isotope series from both animals demonstrate an adherence to separate  
339 home ranges. The MIS 5e mammoth shows values similar to bedrock units outcropping locally  
340 in central-western Missouri and neighboring areas of Kansas and Oklahoma. The MIS 3  
341 mammoth, however, had a home range across rock units with much higher  $^{87}\text{Sr}/^{86}\text{Sr}$  values. The  
342 home ranges for these animals do not overlap, despite their recovery from different strata within  
343 the same locality.

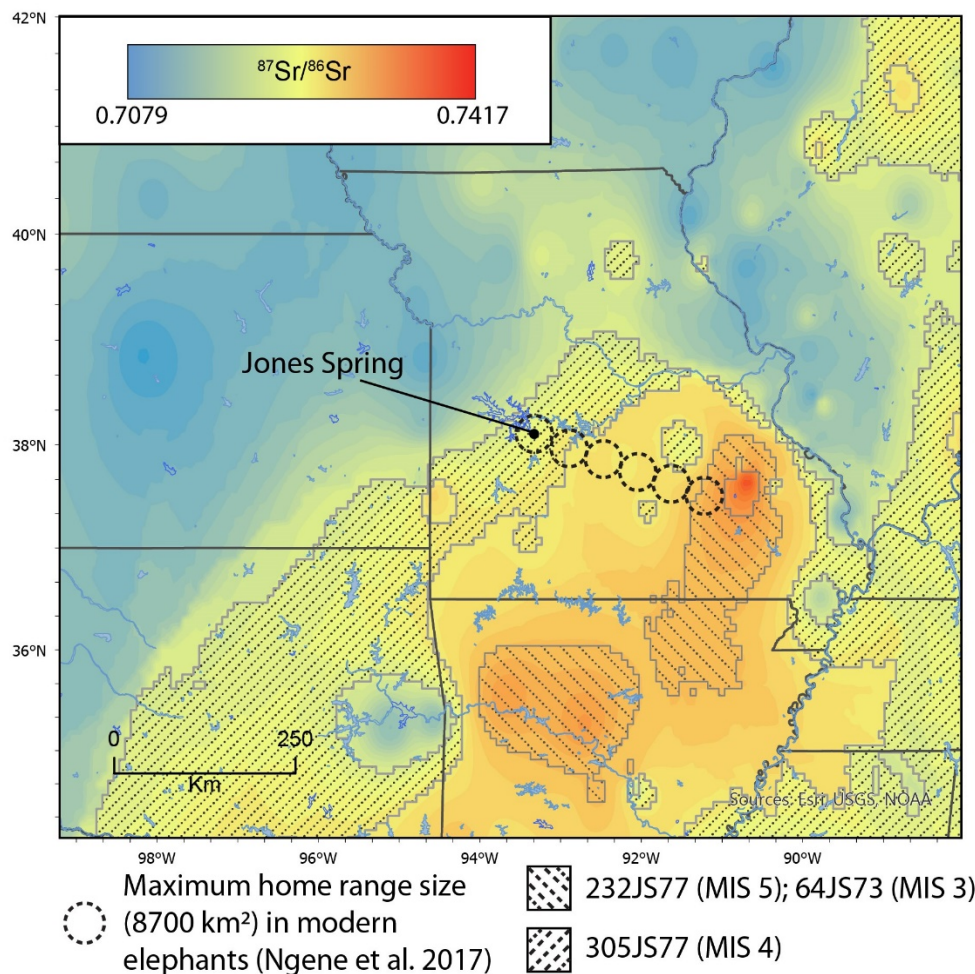

Figure 6. Mobility in mammoths from Jones Spring, Hickory Co., MO. Hatched areas indicate the range of  $^{87}\text{Sr}/^{86}\text{Sr}$  values from mammoth molar ridge-plates. One mammoth (305JS77) exhibits local values. Two separate mammoths (232JS77, 64JS73) exhibit Sr values suggesting >200 km movement from the central core of the Ozark uplift. This implies movement over multiple years that is at least six times larger than the maximum home range size documented in modern elephants (Netosha National Park, Namibia). Basemap isoscape data from Widga et al. (2017b), Hedman et al. (2009, 2018).

## 352 **DISCUSSION**

353           Despite overall similar isotopic values in mammoths and mastodons throughout the  
354 period of this study, underlying nuances are informative to regional changes in niche structure  
355 and climate. The absence of mastodons during the coldest parts of the LGM suggests that  
356 *Mammuthus* were, at least to some degree, sensitive to colder climates and adjusted its range  
357 accordingly.

358           Comparisons between co-eval mammoths and mastodons indicate a gradual collapse of  
359 niche structure. Prior to MIS 2,  $\delta^{13}\text{C}_{\text{coll}}$  and  $\delta^{15}\text{N}_{\text{coll}}$  values between taxa were significantly  
360 different. By the end of the Allerød, mammoth and mastodon diets were isotopically  
361 indistinguishable.

362           Through time, there was no significant change in the  $\delta^{13}\text{C}_{\text{coll}}$  of mastodons. Although  
363 average mammoth  $\delta^{13}\text{C}_{\text{coll}}$  in the region during the latter part of the LGM was slightly more  
364 negative than other time periods, this is not a marked shift and may be a function of decreased  
365 pCO<sub>2</sub> during that time (Schubert and Jahren 2015). Globally, Siberian and European mammoths  
366 exhibit a similar range of  $\delta^{13}\text{C}_{\text{coll}}$  values (Iacumin et al. 2010; Szpak et al. 2010; Arppe et al.  
367 2019; Schwartz-Narbonne et al. 2019).

368           In both taxa, mean  $\delta^{15}\text{N}_{\text{coll}}$  decreases slightly throughout the sequence, however, the  
369 minimum  $\delta^{15}\text{N}$  values for mastodons during the Bølling, Allerød, and Younger Dryas are  
370 significantly lower than earlier mastodons. The anomalously low values of these late mastodons  
371 are also shared with other published mastodon values in the Great Lakes region (Metcalf et al.  
372 2013). They are also significantly lower than contemporary midwestern, Eurasian or Beringean  
373 mammoths (with some exceptions, Drucker et al. 2018). The timing of these low, mastodon  
374  $\delta^{15}\text{N}_{\text{coll}}$  values correspond to regionally low  $\delta^{15}\text{N}_{\text{coll}}$  values in the bone collagen of non-



375 proboscidean taxa from European late Quaternary contexts (Drucker et al., 2009; Richards and  
376 Hedges, 2003; Rabanus-Wallace et al., 2017; Stevens et al., 2008) suggesting broad changes in  
377 global climate may have had cascading impacts in the N budget of local ecosystems.

378         However, understanding in more detail how climate might have affected N cycling in  
379 midwestern ecosystems remains unclear. Flux in soil and plant N may be a function of plant-  
380 based N<sub>2</sub> fixation (Shearer and Kohl 1993), rooting depth (Schulze et al. 1994), N loss related to  
381 climate factors (Austin and Vitousek 1998; Handley and Raven 1992), microbial activity, or  
382 mycorrhizal colonization (Hobbie et al. 2000; Michelsen et al. 1998;). Furthermore, the role of  
383 large herbivore populations in N flux may be significant (Frank et al. 2004). In N limited  
384 environments such as tundra, terrestrial plants may receive relatively more N from inorganic  
385 sources. Boreal forests like those of the Midwest during the Bølling and Allerød, however,  
386 exhibit relatively greater biological productivity, so plant shoots are more likely to take in  
387 volatilized ammonia (low  $\delta^{15}\text{N}$ ) from organic sources such as urea (Fujiyoshi et al. 2017).

388         At this time, it is difficult to distinguish which (if any) of these factors had an impact on  
389 late Quaternary mastodon  $\delta^{15}\text{N}_{\text{coll}}$  values. Although there is a wide range in  $\delta^{15}\text{N}_{\text{coll}}$  of mammoths  
390 and mastodons throughout the sequence,  $\delta^{15}\text{N}_{\text{coll}}$  values below 5‰ are only present in mastodons  
391 during post-LGM deglaciation in the lower Great Lakes (39-43 deg. latitude), throughout an area  
392 suggested to be vegetated by a disharmonious flora dominated by Black Ash and Spruce  
393 (Gonzales and Grimm 2009; Gill et al. 2009) (Figure 7). The low  $\delta^{15}\text{N}_{\text{coll}}$  values suggest that  
394 these mastodons occupied an undefined, local-scale, dietary niche that was not shared by  
395 contemporary mammoths, or by earlier mastodons. Previous research has suggested that the  
396 Bølling-Allerød may have been a time of high mastodon populations in the Great Lakes region  
397 (Widga et al. 2017a). The concentration of mastodons around water sources may have had an



398 impact on the  $\delta^{15}\text{N}$  of browsed plants due to increased contributions of herbivore urea.  
399 Isotopically light plant shoots can occur with increased utilization of volatilized  $\text{NH}_4$  from organic  
400 sources, including urea from herbivores.

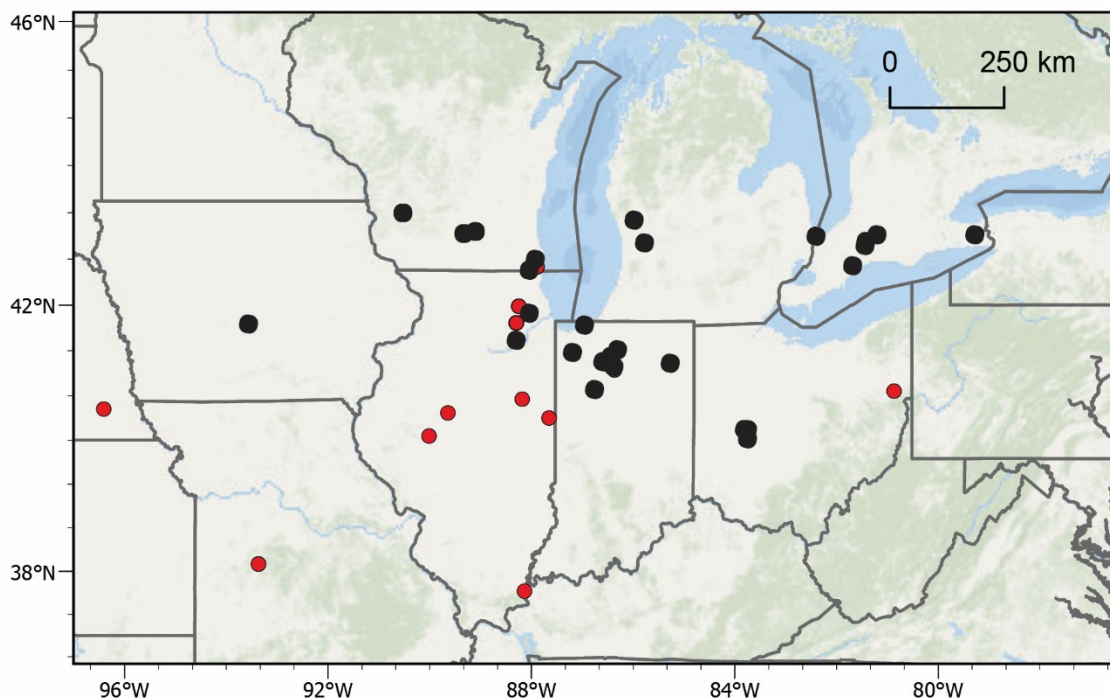

401  
402 Figure 7. Mastodon distribution during the Bølling-Allerød. Black circles indicate mastodon  
403  $\delta^{15}\text{N}_{\text{coll}} < 5\text{‰}$ . Red circles represent mastodons with  $\delta^{15}\text{N}_{\text{coll}} > 5\text{‰}$ .

404

#### 405 Life Histories of midwestern Mammoths

406 Through analyses of incremental growth structures in mammoths, such as molar enamel  
407 or tusk dentin, we can reconstruct longitudinal life histories that reflect the landscape  
408 experienced by an animal over multiple years. Late Pleistocene mammoths from the study area  
409 exhibit relatively consistent, down-tooth patterns in  $\delta^{13}\text{C}$  and  $\delta^{18}\text{O}$ . Similar bulk enamel isotope  
410 values in South Dakota, Wisconsin, and Illinois mammoths suggest access to broadly similar  
411 resources, and relatively stable access to these resources across multiple years of the life of an

412 individual (Figure 4). Less negative  $\delta^{13}\text{C}$  and  $\delta^{18}\text{O}$  values in the last forming samples of the  
413 Schaeffer mammoth suggest a change in that animal's life history in the year before death. This  
414 change could be explained by local environmental changes resulting in nutritional stress.

415 Two mammoths from the Jones Spring site in southwest Missouri provide a pre-LGM  
416 perspective on landscapes that mammoths occupied (Figure 4). A tooth plate dating to MIS 5e  
417 from Jones Spring has less negative  $\delta^{18}\text{O}$  and  $\delta^{13}\text{C}$  values compared to the MIS 2 samples. This  
418 indicates warmer overall conditions and a diet that incorporated more C4 grasses throughout  
419 multiple years. Pollen from the same stratigraphic units further suggest that southwestern  
420 Missouri during MIS 5e was dominated by *Pinus* (no *Picea*) with a significant non-arboreal  
421 component (King 1973). Importantly, Sr isotopes from this tooth indicate that while this tooth  
422 was forming, the animal was foraging across surfaces that are more radiogenic than local values.  
423 The nearest area with  $^{87}\text{Sr}/^{86}\text{Sr}$  values  $>0.7140$  is the central Ozark uplift to the east of Jones  
424 Spring (Figure 6). The wide amplitude of  $\delta^{18}\text{O}$  values throughout the length of this tooth,  
425 combined with the Sr isotope data suggesting adherence to the central Ozark uplift suggest  
426 relatively broad shifts in annual water availability and/or that this animal utilized a variety of  
427 water sources, including surface sources and freshwater springs.

428 The MIS 4 molar from Jones Spring has  $\delta^{18}\text{O}$  values intermediate between the MIS 2  
429 samples and the MIS 5e sample, along with  $\delta^{13}\text{C}$  values that indicate more C4 consumption than  
430 MIS 2 samples (Figure 4). This mammoth occupied a cooler environment than the MIS 5e  
431 mammoth, but significantly warmer than the late Pleistocene mammoths in the MIS 2 group.

432 In the case of the two, microsampled mammoths from Jones Spring, MO, isotopic trends  
433 in each animal illustrates different life histories (Figure 5). The MIS 4 mammoth occupied the  
434 western Ozarks as indicated by  $^{87}\text{Sr}/^{86}\text{Sr}$  values deposited throughout the development of the

435 sampled portion of the tooth. It occupied a landscape where C4 vegetation was common, with  
436 mild winter temperatures. The MIS 3 mammoth from Jones Spring occupied the central core of  
437 the Ozark uplift indicated by  $^{87}\text{Sr}/^{86}\text{Sr}$  values deposited during the formation of the sampled  
438 tooth. However, between the cessation of enamel formation and death, this animal moved ~200  
439 km to the western Ozarks where it was preserved in the Jones Spring deposits. The  $\delta^{18}\text{O}$  series of  
440 this animal suggests greater seasonality during MIS 3 compared to MIS 5e, with deep negative  
441 excursions during the cold season. It also had a diet composed primarily of C4 vegetation.

442         These results suggest a broadly similar geographic scale of landscape-use in late  
443 Quaternary mammoths in the Midwest to mammoths in the Great Plains and Florida (Esler et al.  
444 2019; Hoppe et al. 1999; Hoppe 2004). Overall, mammoths from both regions do not engage in  
445 significant seasonal migrations, but can move greater distances at annual to decadal time-scales.  
446 Further, although  $\delta^{13}\text{C}_{\text{coll}}$  values in mammoths clearly suggest a niche that, at times, included C3-  
447 rich diets in a region that was dominated by forest, not grasslands, both Jones Spring mammoths  
448 were mixed feeders with C4 grasses making up a significant part of their diet. The individual life  
449 histories of these mammoths are highly variable, underscoring the need to control for individual  
450 mobility in stable isotope studies of large herbivore taxa.

#### 451         Testing scenarios of late Pleistocene Proboscidean population dynamics

452         Can this stable isotope dataset illuminate trends in late Proboscidean population  
453 dynamics during deglaciation in the Midwest? It is possible that the shift in  $\delta^{15}\text{N}$  represents the  
454 colonization of a novel ecological niche that also coincides with climate and vegetational  
455 changes at the beginning of the Bølling-Allerød. However, it is unclear what this niche might be.  
456 Stable isotopes alone do not adequately define this niche space, and further paleobotanical work  
457 is necessary. Drucker et al. (2018) also noted anomalously low  $\delta^{15}\text{N}$  values in LGM mammoths

458 from Mezyhrich in central Europe, and attributed this pattern to a large, but unspecific, shift in  
459 dietary niche. This is counter-intuitive in warming landscapes of the Midwest since boreal forests  
460 typically have increased amounts of N fixing microbes relative to tundra environments, thus  
461 increasing the  $\delta^{15}\text{N}$  in forage, overall.

462         Some studies have suggested that the growth rate of an individual is inversely correlated  
463 with  $\delta^{15}\text{N}$  (Warinner and Tuross 2010). This would be consistent with some scenarios of late  
464 Pleistocene mastodon population dynamics. Fisher (Fisher 2009; 2018) suggests that predator  
465 pressure from Paleoindian groups who were megafaunal specialists would have caused  
466 mastodons to mature at a younger age. A decrease in the age at weaning would mean a shorter  
467 period of nursing-related, elevated dietary  $\delta^{15}\text{N}$  in young mastodons. If this were the case, we  
468 would expect an overall decrease in  $\delta^{15}\text{N}$  of bone collagen in animals in their first and second  
469 decade of life. In our dataset, there is no significant change in maximum or mean  $\delta^{15}\text{N}$  in  
470 mastodon bone collagen, despite a subset of mastodons that have lower  $\delta^{15}\text{N}$  values. If predator  
471 pressure is contributing to faster maturation and shortening the time of nursing, then it is only  
472 occurring in some areas. However, even if this were the case in these areas, it is still uncertain  
473 what ecological processes might drive an increase in growth rate. Depending on local forage  
474 conditions experienced by an animal, an increase in growth rate may be caused by increased  
475 predator pressure (Fisher 2009) or a decrease in population density (Wolverton et al. 2009).

476         It is also possible that low  $\delta^{15}\text{N}$  values in post-LGM mastodons represents a systematic  
477 change in predator avoidance strategies among some mastodon populations (Fiedel et al. 2019).  
478 Mastodons may have been attracted to low  $\delta^{15}\text{N}$  areas such as marshes and wetlands as a  
479 response to new predators on the landscape (i.e., humans). However, taphonomic modification of  
480 late Pleistocene proboscidean materials by humans or other predators is extremely rare in this

481 dataset (Widga et al. 2017a), so we see this scenario as an unlikely driver of mastodon landscape  
482 use.

483 If proboscidean populations are dense on the landscape (Widga et al. 2017a) there may  
484 also be rapid, significant, and long-term changes to N cycle. An influx of N via urea as would be  
485 expected in high-density areas, would cause isotopically heavy plant roots and isotopically light  
486 shoots. Under intense grazing pressure, changes to N contributions change quickly from  
487 inorganic soil mineral N reservoirs to N from urea (McNaughton et al. 1988; Knapp et al. 1999).  
488 Individuals with lower  $\delta^{15}\text{N}_{\text{coll}}$  values during the Allerød lived in areas with high mastodon  
489 populations, which may have contributed to isotopically light forage (due to ammonia  
490 volatilization, Knapp et al. 1999). However, this scenario does not explain why this shift is absent  
491 in mammoths during this time.

492

## 493 **CONCLUSIONS**

494 Stable isotopes of proboscidean tissues in the midwestern US illustrate the variability  
495 inherent in modern paleoecological analyses. Traditional approaches to understanding animal  
496 diets and landscape use through morphology and a reliance on modern analogues is inadequate  
497 for understanding paleoecological changes within megafaunal populations, or during times of  
498 rapid ecological change such as the late Quaternary.

499 Stable isotopes from bone collagen of midwestern proboscideans suggest consistently  
500 C3-dominated diets over the last 50 ka. During the LGM, mammoth diets may have included C3  
501 grasses, but the prevalence of C3 flora during the post-LGM period is likely due to a landscape

502 shift to more forest (Gonzales and Grimm 2009; Saunders et al. 2010) with grasses making up  
503 very little of the floral communities in the southern Great Lakes region.

504 Despite the strong C3-signal in mammoth and mastodon diets during this period, the  
505 range of dietary flexibility and the degree of overlap between these two taxa is striking. The  
506 isotopically defined dietary niche of mammoths and mastodons show increasing overlap as they  
507 approach extinction. Niche overlap is also supported by assemblages where both taxa co-occur  
508 (Saunders et al. 2010; Widga et al. 2017a). However, there are exceptions to this pattern and  
509 some late mastodons exhibit low  $\delta^{15}\text{N}$  values that may indicate the evolution and occupation of a  
510 new dietary niche, physiological responses to late Pleistocene ecological changes, or some other  
511 process acting on late mastodon populations.

512 Further resolution of mammoth and mastodon life histories are gleaned from stable  
513 isotopes in tooth enamel.  $\delta^{13}\text{C}$  and  $\delta^{18}\text{O}$  generally track climate and landscape changes  
514 experienced during tooth formation. MIS 2 mammoths are broadly similar in their isotopic life  
515 histories and illustrate relative homogeneity of landscape conditions across the Midwest at this  
516 time. Micro-sampled mammoth molars from Jones Spring, MO, indicate a significant increase in  
517 MIS 3 seasonality, compared to the last interglacial period (MIS 5e). Finally, some mammoths in  
518 this study died >200 km away from where they lived during the formation of sampled molars  
519 suggesting lifetime mobility patterns in mammoths could have a significant effect on presumed  
520 'local' stable isotope values.

521

522 **Acknowledgements.**

523           The study benefited from discussions with Paul Countryman, Eric Grimm, and Bonnie  
524 Styles, then at the Illinois State Museum; Rhiannon Stevens (University College of London) and  
525 Matt G. Hill (Iowa State University). Additional conversations with Don Esker greatly clarified  
526 micro-milling methods, and Joseph Andrew (University of Kansas) assisted with Sr isotope  
527 analyses. Jeff Pigati and two anonymous reviewers provided invaluable feedback for  
528 strengthening the manuscript. This research was funded by NSF grants 1050638, 1049885 and  
529 1050261 and the Illinois State Museum Society. Finally, we would like to acknowledge all of the  
530 collections managers and curators who assisted us with access to the specimens within their care.  
531  
532

533 **Figures**

534 Figure 1. Map of dated midwestern mammoths (blue) and mastodons (red) with  
535 associated  $\delta^{13}\text{C}_{\text{coll}}$  and  $\delta^{15}\text{N}_{\text{coll}}$  data. See SM Table 2 for details.

536 Figure 2. Schematic illustration of serial and micro-sampling strategies.

537 Figure 3. Changes in midwestern proboscidean collagen  $\delta^{13}\text{C}$  and  $\delta^{15}\text{N}$  through time.

538 Figure 4. Time series, serial enamel  $\delta^{13}\text{C}$ ,  $\delta^{18}\text{O}$ ,  $^{87}\text{Sr}/^{86}\text{Sr}$ .

539 Figure 5. Time series, micro-sampled enamel  $\delta^{13}\text{C}$ ,  $\delta^{18}\text{O}$ ,  $^{87}\text{Sr}/^{86}\text{Sr}$ . Both specimens are  
540 from Jones Spring, Hickory County, Missouri.

541 Figure 6. Mobility in mammoths from Jones Spring, Hickory Co., MO. Hatched areas  
542 indicate the range of  $^{87}\text{Sr}/^{86}\text{Sr}$  values from mammoth molar ridge-plates. One mammoth  
543 (305JS77) exhibits local values. Two separate mammoths (232JS77, 64JS73) exhibit Sr  
544 values suggesting >200 km movement from the central core of the Ozark uplift. This  
545 implies movement over multiple years that is at least six times larger than the maximum  
546 home range size documented in modern elephants (Netosha National Park, Namibia).  
547 Basemap isoscape data from Widga et al. (2017b), Hedman et al. (2009, 2018).

548 Figure 7. Mastodon distribution during the Bølling-Allerød. Black circles indicate  
549 mastodon  $\delta^{15}\text{N}_{\text{coll}} < 5\text{‰}$ . Red circles represent mastodons with  $\delta^{15}\text{N}_{\text{coll}} > 5\text{‰}$ .

550

551 **Tables**

552 Table 1. Temporal Scale in Paleoecological Analyses.

553 Table 2. Mammoth and mastodon collagen stable isotope values, by chronzone.

554 Table 3. Summary of serial and micro-sampled tooth enamel series:  $\delta^{13}\text{C}$ ,  $\delta^{18}\text{O}$ ,  $^{87}\text{Sr}/^{86}\text{Sr}$ .

555



556 **Supplemental information**

557 SM Supplemental Material. Word File

558 SM Table 1. Mammoth and Mastodon  $\delta^{13}\text{C}$ ,  $\delta^{15}\text{N}$  data.

559 SM Table 2. Mammoth enamel isotope data.

560 SM Table 3. Radiocarbon dated mammoths and mastodons from the Midwest.

561

562 **References**

563

564 Alley, Richard B. 2000. "The Younger Dryas Cold Interval as Viewed from Central Greenland." *Quaternary Science Reviews* 19 (1): 213–26. [https://doi.org/10.1016/S0277-3791\(99\)00062-1](https://doi.org/10.1016/S0277-3791(99)00062-1).

567 Alroy, John. 2001. "A Multispecies Overkill Simulation of the End-Pleistocene Megafaunal Mass Extinction." *Science* 292 (5523): 1893–96. <https://doi.org/10.1126/science.1059342>.

570 Arppe, Laura, Juha A. Karhu, Sergey Vartanyan, Dorothée G. Drucker, Heli Etu-Sihvola, and Hervé Bocherens. 2019. "Thriving or Surviving? The Isotopic Record of the Wrangel Island Woolly Mammoth Population." *Quaternary Science Reviews* 222 (October): 105884. <https://doi.org/10.1016/j.quascirev.2019.105884>.

574 Augustine, David J., Samuel J. McNaughton, and Douglas A. Frank. 2003. "Feedbacks Between Soil Nutrients and Large Herbivores in a Managed Savanna Ecosystem." *Ecological Applications* 13 (5): 1325–37. <https://doi.org/10.1890/02-5283>.

577 Austin, Amy T., and P. M. Vitousek. 1998. "Nutrient Dynamics on a Precipitation Gradient in Hawai'i." *Oecologia* 113 (4): 519–29. <https://doi.org/10.1007/s004420050405>.

579 Bataille, Clément P., and Gabriel J. Bowen. 2012. "Mapping  $87\text{Sr}/86\text{Sr}$  Variations in Bedrock and Water for Large Scale Provenance Studies." *Chemical Geology* 304–305 (April): 39–52. <https://doi.org/10.1016/j.chemgeo.2012.01.028>.

582 Baumann, Eric J., and Brooke E. Crowley. 2015. "Stable Isotopes Reveal Ecological Differences amongst Now-Extinct Proboscideans from the Cincinnati Region, USA." *Boreas* 44 (1): 240–54. <https://doi.org/10.1111/bor.12091>.

585 Birks, Hilary H., Bas van Geel, Daniel C. Fisher, Eric C. Grimm, Wim J. Kuijper, Jan van Arkel, and Guido B. A. van Reenen. 2019. "Evidence for the Diet and Habitat of Two Late Pleistocene Mastodons from the Midwest, USA." *Quaternary Research* 91 (2): 792–812. <https://doi.org/10.1017/qua.2018.100>.

589 Bocherens, Hervé, Gilles Pacaud, Petr A. Lazarev, and André Mariotti. 1996. "Stable Isotope Abundances ( $^{13}\text{C}$ ,  $^{15}\text{N}$ ) in Collagen and Soft Tissues from Pleistocene Mammals from Yakutia: Implications for the Palaeobiology of the Mammoth Steppe." *Palaeogeography, Palaeoclimatology, Palaeoecology*, Biogenic Phosphates as Palaeoenvironmental Indicators, 126 (1): 31–44. [https://doi.org/10.1016/S0031-0182\(96\)00068-5](https://doi.org/10.1016/S0031-0182(96)00068-5).

594 Brock, Fiona, Thomas Higham, Peter Ditchfield, and Christopher Bronk Ramsey. 2010. "Current Pretreatment Methods for AMS Radiocarbon Dating at the Oxford Radiocarbon

595

- 596 Accelerator Unit (Orau).” *Radiocarbon* 52 (1): 103–12.  
597 <https://doi.org/10.1017/S0033822200045069>.
- 598 Broughton, Jack M., and Elic M. Weitzel. 2018. “Population Reconstructions for Humans and  
599 Megafauna Suggest Mixed Causes for North American Pleistocene Extinctions.” *Nature*  
600 *Communications* 9 (1): 5441. <https://doi.org/10.1038/s41467-018-07897-1>.
- 601 Cerling, Thure E., George Wittemyer, James R. Ehleringer, Christopher H. Remien, and Iain  
602 Douglas-Hamilton. 2009. “History of Animals Using Isotope Records (HAIR): A 6-Year  
603 Dietary History of One Family of African Elephants.” *Proceedings of the National*  
604 *Academy of Sciences* 106 (20): 8093–8100. <https://doi.org/10.1073/pnas.0902192106>.
- 605 Chafota, Jonas, and Norman Owen-Smith. 2009. “Episodic Severe Damage to Canopy Trees by  
606 Elephants: Interactions with Fire, Frost and Rain.” *Journal of Tropical Ecology* 25 (3):  
607 341–45. <https://doi.org/10.1017/S0266467409006051>.
- 608 Coe, Malcolm. 1978. “The Decomposition of Elephant Carcasses in the Tsavo (East) National  
609 Park, Kenya.” *Journal of Arid Environments* 1 (1): 71–86. [https://doi.org/10.1016/S0140-](https://doi.org/10.1016/S0140-1963(18)31756-7)  
610 [1963\(18\)31756-7](https://doi.org/10.1016/S0140-1963(18)31756-7).
- 611 Coltrain, Joan Brenner, John M. Harris, Thure E. Cerling, James R. Ehleringer, Maria-Denise  
612 Dearing, Joy Ward, and Julie Allen. 2004. “Rancho La Brea Stable Isotope  
613 Biogeochemistry and Its Implications for the Palaeoecology of Late Pleistocene, Coastal  
614 Southern California.” *Palaeogeography, Palaeoclimatology, Palaeoecology* 205 (3):  
615 199–219. <https://doi.org/10.1016/j.palaeo.2003.12.008>.
- 616 Daniel Bryant, J., and Philip N. Froelich. 1995. “A Model of Oxygen Isotope Fractionation in  
617 Body Water of Large Mammals.” *Geochimica et Cosmochimica Acta* 59 (21): 4523–  
618 4537. [https://doi.org/10.1016/0016-7037\(95\)00250-4](https://doi.org/10.1016/0016-7037(95)00250-4).
- 619 Daux, Valérie, Christophe Lécuyer, Marie Anne Hérán, Romain Amiot, Laurent Simon, François  
620 Fourel, François Martineau, Niels Lynnerup, Hervé Reyckler, and Gilles Escarguel. 2008.  
621 “Oxygen Isotope Fractionation between Human Phosphate and Water Revisited.” *Journal*  
622 *of Human Evolution* 55 (6): 1138–1147. <https://doi.org/10.1016/j.jhevol.2008.06.006>.
- 623 Davis, Matt, and Silvia Pineda-Munoz. 2016. “The Temporal Scale of Diet and Dietary Proxies.”  
624 *Ecology and Evolution* 6 (6): 1883–97. <https://doi.org/10.1002/ece3.2054>.
- 625 Delcourt, Hazel R., and P. Delcourt. 1991. *Quaternary Ecology: A Paleoecological Perspective*.  
626 Springer Science & Business Media.
- 627 Denny, Mark W., Brian Helmuth, George H. Leonard, Christopher D. G. Harley, Luke J. H.  
628 Hunt, and Elizabeth K. Nelson. 2004. “Quantifying scale in ecology: lessons from a  
629 wave-swept shore.” *Ecological Monographs* 74 (3): 513–32. [https://doi.org/10.1890/03-](https://doi.org/10.1890/03-4043)  
630 [4043](https://doi.org/10.1890/03-4043).
- 631 Dirks, Wendy, Timothy G. Bromage, and Larry D. Agenbroad. 2012. “The Duration and Rate of  
632 Molar Plate Formation in Palaeoloxodon Cypriotes and Mammuthus Columbi from  
633 Dental Histology.” *Quaternary International, Mammoths and Their Relatives 1:*  
634 *Biomes, Evolution and Human Impact V International Conference, Le Puy-en-Velay,*  
635 *2010, 255 (March): 79–85.* <https://doi.org/10.1016/j.quaint.2011.11.002>.
- 636 Drucker, D. G., Bridault, A., Iacumin, P., & Bocherens, H. (2009). Bone stable isotopic  
637 signatures ( $^{15}\text{N}$ ,  $^{18}\text{O}$ ) as tracers of temperature variation during the Late-glacial and  
638 early Holocene: case study on red deer *Cervus elaphus* from Rochedane (Jura, France).  
639 *Geological Journal*, 44(5), 593-604.
- 640 Drucker, Dorothée G., Rhiannon E. Stevens, Mietje Germonpré, Mikhail V. Sablin, Stéphane  
641 Péan, and Hervé Bocherens. 2018. “Collagen Stable Isotopes Provide Insights into the

- 642 End of the Mammoth Steppe in the Central East European Plains during the  
643 Epigravettian.” *Quaternary Research* 90 (3): 457–69.  
644 <https://doi.org/10.1017/qua.2018.40>.
- 645 El Adli, Joseph J., Michael D. Cherney, Daniel C. Fisher, John M. Harris, Farrell, Aisling, and  
646 Cox, Shelley. 2015. “Last Years of Life and Season of Death of a Columbian Mammoth  
647 from Rancho La Brea.” *Science Series, Natural History Museum of Los Angeles County*  
648 42: 65–80.
- 649 El Adli, Joseph J., Daniel C. Fisher, Sergey L. Vartanyan, and Alexei N. Tikhonov. 2017. “Final  
650 Years of Life and Seasons of Death of Woolly Mammoths from Wrangel Island and  
651 Mainland Chukotka, Russian Federation.” *Quaternary International*, VIth International  
652 Conference on Mammoths and their Relatives, Part 3, 445 (July): 135–45.  
653 <https://doi.org/10.1016/j.quaint.2016.07.017>.
- 654 Esker, D., Forman, S. L., Widga, C., Walker, J. D., & Andrew, J. E. (2019). Home range of the  
655 Columbian mammoths (*Mammuthus columbi*) and grazing herbivores from the Waco  
656 Mammoth National Monument, (Texas, USA) based on strontium isotope ratios from  
657 tooth enamel bioapatite. *Palaeogeography, Palaeoclimatology, Palaeoecology*, 534,  
658 109291.
- 659 Fiedel, Stuart, Robert Feranec, Thomas Marino, and David Driver. 2019. “A New AMS  
660 Radiocarbon Date for the Ivory Pond Mastodon.” *Eastern Paleontologist* 3: 1–15.
- 661 Fisher, Daniel C. 2009. “Paleobiology and Extinction of Proboscideans in the Great Lakes  
662 Region of North America.” In *American Megafaunal Extinctions at the End of the*  
663 *Pleistocene*, edited by Gary Haynes, 55–75. Vertebrate Paleobiology and  
664 Paleanthropology. Dordrecht: Springer Netherlands. [https://doi.org/10.1007/978-1-](https://doi.org/10.1007/978-1-4020-8793-6_4)  
665 [4020-8793-6\\_4](https://doi.org/10.1007/978-1-4020-8793-6_4).
- 666 ———. 2018. “Paleobiology of Pleistocene Proboscideans.” *Annual Review of Earth and*  
667 *Planetary Sciences* 46 (1): 229–60. [https://doi.org/10.1146/annurev-earth-060115-](https://doi.org/10.1146/annurev-earth-060115-012437)  
668 [012437](https://doi.org/10.1146/annurev-earth-060115-012437).
- 669 Fisher, Daniel C., and David L. Fox. 2006. “Five Years in the Life of an Aucilla River  
670 Mastodon.” In *First Floridians and Last Mastodons: The Page-Ladson Site in the Aucilla*  
671 *River*, edited by S. David Webb, 343–77. Dordrecht: Springer Netherlands.  
672 [https://doi.org/10.1007/978-1-4020-4694-0\\_12](https://doi.org/10.1007/978-1-4020-4694-0_12).
- 673 Fisher, Daniel C., Alexei N. Tikhonov, Pavel A. Kosintsev, Adam N. Rountrey, Bernard  
674 Buigues, and Johannes van der Plicht. 2012. “Anatomy, Death, and Preservation of a  
675 Woolly Mammoth (*Mammuthus Primigenius*) Calf, Yamal Peninsula, Northwest  
676 Siberia.” *Quaternary International*, Mammoths and Their Relatives 1: Biotopes,  
677 Evolution and Human Impact V International Conference, Le Puy-en-Velay, 2010, 255  
678 (March): 94–105. <https://doi.org/10.1016/j.quaint.2011.05.040>.
- 679 Fortelius, Mikael, and Nikos Solounias. 2000. “Functional Characterization of Ungulate Molars  
680 Using the Abrasion-Attrition Wear Gradient: A New Method for Reconstructing  
681 Paleodiets.” *American Museum Novitates* 225 (4): 1–36. [https://doi.org/10.1206/0003-](https://doi.org/10.1206/0003-0082(2000)301<0001:FCOUMU>2.0.CO;2)  
682 [0082\(2000\)301<0001:FCOUMU>2.0.CO;2](https://doi.org/10.1206/0003-0082(2000)301<0001:FCOUMU>2.0.CO;2).
- 683 Fox, David L., and Daniel C. Fisher. 2001. “Stable Isotope Ecology of a Late Miocene  
684 Population of Gomphotherium Productus (Mammalia, Proboscidea) from Port of Entry  
685 Pit, Oklahoma, USA.” *PALAIOS* 16 (3): 279–93. [https://doi.org/10.1669/0883-](https://doi.org/10.1669/0883-1351(2001)016<0279:SIEOAL>2.0.CO;2)  
686 [1351\(2001\)016<0279:SIEOAL>2.0.CO;2](https://doi.org/10.1669/0883-1351(2001)016<0279:SIEOAL>2.0.CO;2).
- 687 Fox-Dobbs, K., J.K. Bump, R.O. Peterson, D.L. Fox, and P.L. Koch. 2007. “Carnivore-Specific

- 688 Stable Isotope Variables and Variation in the Foraging Ecology of Modern and Ancient  
689 Wolf Populations: Case Studies from Isle Royale, Minnesota, and La Brea.” *Canadian*  
690 *Journal of Zoology* 85 (4): 458–71. <https://doi.org/10.1139/Z07-018>.
- 691 Fox-Dobbs, Kena, Jennifer A. Leonard, and Paul L. Koch. 2008. “Pleistocene Megafauna from  
692 Eastern Beringia: Paleoecological and Paleoenvironmental Interpretations of Stable  
693 Carbon and Nitrogen Isotope and Radiocarbon Records.” *Palaeogeography,*  
694 *Palaeoclimatology, Palaeoecology* 261 (1): 30–46.  
695 <https://doi.org/10.1016/j.palaeo.2007.12.011>.
- 696 Frank, Douglas A., R. David Evans, and Benjamin F. Tracy. 2004. “The Role of Ammonia  
697 Volatilization in Controlling the Natural <sup>15</sup> N Abundance of a Grazed Grassland.”  
698 *Biogeochemistry* 68 (2): 169–78. <https://doi.org/10.1023/B:BI0G.0000025736.19381.91>.
- 699 Fujiyoshi, Lei, Atsuko Sugimoto, Akemi Tsukuura, Asami Kitayama, M. Larry Lopez Caceres,  
700 Byambasuren Mijidsuren, Ariunaa Saraadanbazar, and Maki Tsujimura. 2017. “Spatial  
701 Variations in Larch Needle and Soil δ <sup>15</sup> N at a Forest–Grassland Boundary in Northern  
702 Mongolia.” *Isotopes in Environmental and Health Studies* 53 (1): 54–69.  
703 <https://doi.org/10.1080/10256016.2016.1206093>.
- 704 Geel, Bas van, Daniel C. Fisher, Adam N. Rountrey, Jan van Arkel, Joost F. Duivenvoorden,  
705 Aline M. Nieman, Guido B. A. van Reenen, Alexei N. Tikhonov, Bernard Buigues, and  
706 Barbara Gravendeel. 2011. “Palaeo-Environmental and Dietary Analysis of Intestinal  
707 Contents of a Mammoth Calf (Yamal Peninsula, Northwest Siberia).” *Quaternary*  
708 *Science Reviews* 30 (27): 3935–46. <https://doi.org/10.1016/j.quascirev.2011.10.009>.
- 709 Gill, Jacquelyn L., John W. Williams, Stephen T. Jackson, Katherine B. Lininger, and Guy S.  
710 Robinson. 2009. “Pleistocene Megafaunal Collapse, Novel Plant Communities, and  
711 Enhanced Fire Regimes in North America.” *Science* 326 (5956): 1100–1103.  
712 <https://doi.org/10.1126/science.1179504>.
- 713 Gonzales, Leila M., and Eric C. Grimm. 2009. “Synchronization of Late-Glacial Vegetation  
714 Changes at Crystal Lake, Illinois, USA with the North Atlantic Event Stratigraphy.”  
715 *Quaternary Research* 72 (2): 234–45. <https://doi.org/10.1016/j.yqres.2009.05.001>.
- 716 Gonzales, L.M., J.W. Williams, and E.C. Grimm. 2009. “Expanded Response-Surfaces: A New  
717 Method to Reconstruct Paleoclimates from Fossil Pollen Assemblages That Lack Modern  
718 Analogues.” *Quaternary Science Reviews* 28 (27–28): 3315–32.  
719 <https://doi.org/10.1016/j.quascirev.2009.09.005>.
- 720 Green, Jeremy L., Larisa R. G. DeSantis, and Gregory James Smith. 2017. “Regional Variation  
721 in the Browsing Diet of Pleistocene Mammot Americanum (Mammalia, Proboscidea) as  
722 Recorded by Dental Microwear Textures.” *Palaeogeography, Palaeoclimatology,*  
723 *Palaeoecology* 487 (December): 59–70. <https://doi.org/10.1016/j.palaeo.2017.08.019>.
- 724 Guldmond, Robert, and Rudi Van Aarde. 2008. “A Meta-Analysis of the Impact of African  
725 Elephants on Savanna Vegetation.” *The Journal of Wildlife Management* 72 (4): 892–99.  
726 Handley, L. L., and J. A. Raven. 1992. “The Use of Natural Abundance of Nitrogen Isotopes in  
727 Plant Physiology and Ecology.” *Plant, Cell and Environment* 15 (9): 965–85.  
728 <https://doi.org/10.1111/j.1365-3040.1992.tb01650.x>.
- 729 Hedges, Robert E. M., John G. Clement, C. David L. Thomas, and Tamsin C. O’Connell. 2007.  
730 “Collagen Turnover in the Adult Femoral Mid-Shaft: Modeled from Anthropogenic  
731 Radiocarbon Tracer Measurements.” *American Journal of Physical Anthropology* 133  
732 (2): 808–16. <https://doi.org/10.1002/ajpa.20598>.
- 733 Hedman, Kristin M., B. Brandon Curry, Thomas M. Johnson, Paul D. Fullagar, and Thomas E.



- 734 Emerson. 2009. "Variation in Strontium Isotope Ratios of Archaeological Fauna in the  
735 Midwestern United States: A Preliminary Study." *Journal of Archaeological Science* 36  
736 (1): 64–73. <https://doi.org/10.1016/j.jas.2008.07.009>.
- 737 Hedman, Kristin M., Philip A. Slater, Matthew A. Fort, Thomas E. Emerson, and John M.  
738 Lambert. 2018. "Expanding the Strontium Isoscape for the American Midcontinent:  
739 Identifying Potential Places of Origin for Cahokian and Pre-Columbian Migrants."  
740 *Journal of Archaeological Science: Reports* 22 (September): 202–213.  
741 <https://doi.org/10.1016/j.jasrep.2018.09.027>.
- 742 Higham, T F G, R M Jacobi, and C B Ramsey. 2006. "AMS Radiocarbon Dating of Ancient  
743 Bone Using Ultrafiltration." *Radiocarbon* 48 (2): 179–195.  
744 [https://doi.org/10.2458/azu\\_js\\_rc.v48i2.2861](https://doi.org/10.2458/azu_js_rc.v48i2.2861).
- 745 Hobbie, E. A., S. A. Macko, and M. Williams. 2000. "Correlations between Foliar  $\Delta^{15}\text{N}$  and  
746 Nitrogen Concentrations May Indicate Plant-Mycorrhizal Interactions." *Oecologia* 122  
747 (2): 273–83. <https://doi.org/10.1007/PL00008856>.
- 748 Hoppe, Kathryn A. 2004. "Late Pleistocene Mammoth Herd Structure, Migration Patterns, and  
749 Clovis Hunting Strategies Inferred from Isotopic Analyses of Multiple Death  
750 Assemblages." *Paleobiology* 30 (1): 129–45. [https://doi.org/10.1666/0094-  
751 8373\(2004\)030<0129:LPMHSM>2.0.CO;2](https://doi.org/10.1666/0094-8373(2004)030<0129:LPMHSM>2.0.CO;2).
- 752 Hoppe, Kathryn A., and Paul L. Koch. 2007. "Reconstructing the Migration Patterns of Late  
753 Pleistocene Mammals from Northern Florida, USA." *Quaternary Research* 68 (3): 347–  
754 52. <https://doi.org/10.1016/j.yqres.2007.08.001>.
- 755 Hoppe, Kathryn A., Paul L. Koch, Richard W. Carlson, and S. David Webb. 1999. "Tracking  
756 Mammoths and Mastodons: Reconstruction of Migratory Behavior Using Strontium  
757 Isotope Ratios." *Geology* 27 (5): 439–42. [https://doi.org/10.1130/0091-  
758 7613\(1999\)027<0439:TMAMRO>2.3.CO;2](https://doi.org/10.1130/0091-7613(1999)027<0439:TMAMRO>2.3.CO;2).
- 759 Iacumin, P., A. Di Matteo, V. Nikolaev, and T. V. Kuznetsova. 2010. "Climate Information from  
760 C, N and O Stable Isotope Analyses of Mammoth Bones from Northern Siberia."  
761 *Quaternary International*, Quaternary Changes of Mammalian Communities Across and  
762 Between Continents, 212 (2): 206–12. <https://doi.org/10.1016/j.quaint.2009.10.009>.
- 763 Keenan, Sarah W., Chris Widga, Debruyne, Jennifer, and schaeffer, sean. 2018. "Nutrient  
764 Hotspots through Time: A Field Guide to Modern and Fossil Taphonomy in East  
765 Tennessee." In *Geology at Every Scale*, by Annette Summers Engel and Robert D.  
766 Hatcher, 61–74. Geological Society of America. [https://doi.org/10.1130/2018.0050\(04\)](https://doi.org/10.1130/2018.0050(04)).
- 767 King, J. E. (1973). Late Pleistocene palynology and biogeography of the western Missouri  
768 Ozarks. *Ecological Monographs*, 43(4): 539-565.
- 769 Knapp, Alan K, John M Blair, John M Briggs, Scott L Collins, David C Hartnett, Loretta C  
770 Johnson, E Gene Towne, M John, and L Scott. 1999. "North Keystone Role of Bison in  
771 American Tallgrass Prairie Bison Increase Habitat Heterogeneity and Alter a Broad  
772 Array of Processes" 49 (1): 39–50.
- 773 Koch, Paul L., Kathryn A. Hoppe, and S. David Webb. 1998. "The Isotopic Ecology of Late  
774 Pleistocene Mammals in North America: Part 1. Florida." *Chemical Geology* 152 (1):  
775 119–38. [https://doi.org/10.1016/S0009-2541\(98\)00101-6](https://doi.org/10.1016/S0009-2541(98)00101-6).
- 776 Koch, Paul L., Noreen Tuross, and Marilyn L. Fogel. 1997. "The Effects of Sample Treatment  
777 and Diagenesis on the Isotopic Integrity of Carbonate in Biogenic Hydroxylapatite."  
778 *Journal of Archaeological Science* 24 (5): 417–429.  
779 <https://doi.org/10.1006/jasc.1996.0126>.

- 780 Lee-Thorp, Julia, and Matt Sponheimer. 2003. “Three Case Studies Used to Reassess the  
781 Reliability of Fossil Bone and Enamel Isotope Signals for Paleodietary Studies.” *Journal*  
782 *of Anthropological Archaeology* 22 (3): 208–216. [https://doi.org/10.1016/S0278-](https://doi.org/10.1016/S0278-4165(03)00035-7)  
783 [4165\(03\)00035-7](https://doi.org/10.1016/S0278-4165(03)00035-7).
- 784 Lepper, Bradley T., Tod A. Frolking, Daniel C. Fisher, Gerald Goldstein, Jon E. Sanger, Dee  
785 Anne Wymer, J. Gordon Ogden, and Paul E. Hooe. 1991. “Intestinal Contents of a Late  
786 Pleistocene Mastodont from Midcontinental North America.” *Quaternary Research* 36  
787 (1): 120–25. [https://doi.org/10.1016/0033-5894\(91\)90020-6](https://doi.org/10.1016/0033-5894(91)90020-6).
- 788 McNaughton, S. J., R. W. Ruess, and S. W. Seagle. 1988. “Large Mammals and Process  
789 Dynamics in African Ecosystems.” *BioScience* 38 (11): 794–800.  
790 <https://doi.org/10.2307/1310789>.
- 791 Metcalfe, Jessica Z., and Fred J. Longstaffe. 2012. “Mammoth Tooth Enamel Growth Rates  
792 Inferred from Stable Isotope Analysis and Histology.” *Quaternary Research* 77 (3): 424–  
793 32. <https://doi.org/10.1016/j.yqres.2012.02.002>.
- 794 ———. 2014. “Environmental Change and Seasonal Behavior of Mastodons in the Great Lakes  
795 Region Inferred from Stable Isotope Analysis.” *Quaternary Research* 82 (2): 366–77.  
796 <https://doi.org/10.1016/j.yqres.2014.07.002>.
- 797 Metcalfe, Jessica Z., Fred J. Longstaffe, Jesse A. M. Ballenger, and C. Vance Haynes. 2011.  
798 “Isotopic Paleoecology of Clovis Mammoths from Arizona.” *Proceedings of the National*  
799 *Academy of Sciences* 108 (44): 17916–20. <https://doi.org/10.1073/pnas.1113881108>.
- 800 Metcalfe, Jessica Z., Fred J. Longstaffe, and Greg Hodgins. 2013. “Proboscideans and  
801 Paleoenvironments of the Pleistocene Great Lakes: Landscape, Vegetation, and Stable  
802 Isotopes.” *Quaternary Science Reviews* 76 (September): 102–13.  
803 <https://doi.org/10.1016/j.quascirev.2013.07.004>.
- 804 Michelsen, Anders, Chris Quarmby, Darren Sleep, and Sven Jonasson. 1998. “Vascular Plant 15  
805 N Natural Abundance in Heath and Forest Tundra Ecosystems Is Closely Correlated with  
806 Presence and Type of Mycorrhizal Fungi in Roots.” *Oecologia* 115 (3): 406–18.  
807 <https://doi.org/10.1007/s004420050535>.
- 808 Mosimann, James E., and Paul S. Martin. 1975. “Simulating Overkill by Paleoindians: Did Man  
809 Hunt the Giant Mammals of the New World to Extinction? Mathematical Models Show  
810 That the Hypothesis Is Feasible.” *American Scientist* 63 (3): 304–13.
- 811 Newsom, Lee A., and Mathew C. Mihlbachler. 2006. “Mastodons (*Mammut Americanum*) Diet  
812 Foraging Patterns Based on Analysis of Dung Deposits.” In *First Floridians and Last*  
813 *Mastodons: The Page-Ladson Site in the Aucilla River*, edited by S. David Webb, 263–  
814 331. Springer Netherlands. [https://doi.org/10.1007/978-1-4020-4694-0\\_10](https://doi.org/10.1007/978-1-4020-4694-0_10).
- 815 Ngene, Shadrack, Moses Makonjio Okello, Joseph Mukeka, Shadrack Muya, Steve Njumbi, and  
816 James Isiche. 2017. Home range sizes and space use of African elephants (*Loxodonta*  
817 *africana*) in the Southern Kenya and Northern Tanzania borderland landscape.  
818 *International Journal of Biodiversity and Conservation* 9(1): 9–26.
- 819 Nogués-Bravo, David, Jesús Rodríguez, Joaquín Hortal, Persaram Batra, and Miguel B. Araújo.  
820 2008. “Climate Change, Humans, and the Extinction of the Woolly Mammoth.” *PLOS*  
821 *Biology* 6 (4): e79. <https://doi.org/10.1371/journal.pbio.0060079>.
- 822 Owen-Smith, R. Norman. 1992. *Megaherbivores: The Influence of Very Large Body Size on*  
823 *Ecology*. Cambridge University Press.
- 824 Pacher, Martina, and Anthony J. Stuart. 2009. “Extinction Chronology and Palaeobiology of the  
825 Cave Bear (*Ursus spelaeus*).” *Boreas* 38 (2): 189–206. [38](https://doi.org/10.1111/j.1502-</a></p></div><div data-bbox=)

- 826 3885.2008.00071.x.
- 827 Pérez-Crespo, Víctor Adrián, Peter Schaaf, Gabriela Solís-Pichardo, Joaquín Arroyo-Cabrales,  
828 Luis M. Alva-Valdivia, and José Ramón Torres-Hernández. 2016. “Strontium Isotopes  
829 and Mobility of a Columbian Mammoth (*Mammuthus Columbi*) Population, Laguna de  
830 Las Cruces, San Luis Potosí, México.” *Geological Magazine* 153 (4): 743–49.  
831 <https://doi.org/10.1017/S001675681500103X>.
- 832 Plumptre, A. J. 1994. “The Effects of Trampling Damage by Herbivores on the Vegetation of the  
833 Pare National Des Volcans, Rwanda.” *African Journal of Ecology* 32 (2): 115–29.  
834 <https://doi.org/10.1111/j.1365-2028.1994.tb00563.x>.
- 835 Post, David M. 2002. “Using Stable Isotopes to Estimate Trophic Position: Models, Methods,  
836 and Assumptions.” *Ecology* 83 (3): 703–718. [https://doi.org/10.1890/0012-9658\(2002\)083\[0703:USITET\]2.0.CO;2](https://doi.org/10.1890/0012-9658(2002)083[0703:USITET]2.0.CO;2).
- 837
- 838 Rabanus-Wallace, M. Timothy, Matthew Wooller, Grant Zazula, Elen Shute, A Hope Jahren,  
839 Pavel Kosintsev, James Burns, James Breen, Bastien Llamas, and Alan Cooper. 2017.  
840 Megafaunal isotopes reveal role of increase moisture on rangeland during late Pleistocene  
841 extinctions. *Nature Ecology and Evolution* 1(0125). [https://doi.org/10.1038/s41559-017-0125-](https://doi.org/10.1038/s41559-017-0125-0125)  
842 0125.
- 843 Rasmussen, Sune O., Matthias Bigler, Simon P. Blockley, Thomas Blunier, Susanne L.  
844 Buchardt, Henrik B. Clausen, Ivana Cvijanovic et al. 2014. A stratigraphic framework for  
845 abrupt climatic changes during the Last Glacial period based on three synchronized  
846 Greenland ice-core records: refining and extending the INTIMATE event stratigraphy.  
847 *Quaternary Science Reviews* 106: 14-28.
- 848 Rhodes, A. N., J. W. Urbance, H. Youga, H. Corlew-Newman, C. A. Reddy, M. J. Klug, J. M.  
849 Tiedje, and D. C. Fisher. 1998. “Identification of Bacterial Isolates Obtained from  
850 Intestinal Contents Associated with 12,000-Year-Old Mastodon Remains.” *Appl.*  
851 *Environ. Microbiol.* 64 (2): 651–58.
- 852 Richards, M. P. and R. E. M. Hedges. 2003. Variations in bone collagen  $\delta^{13}\text{C}$  and  $\delta^{15}\text{N}$  values of  
853 fauna from Northwest Europe over the last 40,000 years. *Palaeogeography,*  
854 *Palaeoclimatology, and Palaeoecology* 193:261-267.
- 855 Ripple, William J., and Blaire Van Valkenburgh. 2010. “Linking Top-down Forces to the  
856 Pleistocene Megafaunal Extinctions.” *BioScience* 60 (7): 516–26.  
857 <https://doi.org/10.1525/bio.2010.60.7.7>.
- 858 Rountrey, Adam N., Daniel C. Fisher, Alexei N. Tikhonov, Pavel A. Kosintsev, Pyotr A.  
859 Lazarev, Gennady Boeskorov, and Bernard Buigues. 2012. “Early Tooth Development,  
860 Gestation, and Season of Birth in Mammoths.” *Quaternary International*, Mammoths and  
861 Their Relatives 1: Biotopes, Evolution and Human Impact V International Conference,  
862 Le Puy-en-Velay, 2010, 255 (March): 196–205.  
863 <https://doi.org/10.1016/j.quaint.2011.06.006>.
- 864 Sah, S. P., H. Rita, and H. Ilvesniemi. 2006. “ $^{15}\text{N}$  Natural Abundance of Foliage and Soil across  
865 Boreal Forests of Finland.” *Biogeochemistry* 80 (3): 277–288.  
866 <https://doi.org/10.1007/s10533-006-9023-9>.
- 867 Saunders, Jeffrey J., Eric C. Grimm, Christopher C. Widga, G. Dennis Campbell, B. Brandon  
868 Curry, David A. Grimley, Paul R. Hanson, Judd P. McCullum, James S. Oliver, and Janis  
869 D. Treworgy. 2010. “Paradigms and Proboscideans in the Southern Great Lakes Region,  
870 USA.” *Quaternary International* 217 (1–2): 175–87.  
871 <https://doi.org/10.1016/j.quaint.2009.07.031>.

- 872 Schubert, B. A., & Jahren, A. H. (2015). Global increase in plant carbon isotope fractionation  
873 following the Last Glacial Maximum caused by increase in atmospheric p CO<sub>2</sub>. *Geology*,  
874 43(5): 435-438.
- 875 Schulze, E.-D., F. S. Chapin, and G. Gebauer. 1994. "Nitrogen Nutrition and Isotope Differences  
876 among Life Forms at the Northern Treeline of Alaska." *Oecologia* 100 (4): 406–12.  
877 <https://doi.org/10.1007/BF00317862>.
- 878 Schwartz-Narbonne, R., F. J. Longstaffe, K. J. Kardynal, P. Druckenmiller, K. A. Hobson, C. N.  
879 Jass, J. Z. Metcalfe, G. Zazula. 2019. "Reframing the mammoth steppe: Insights from  
880 analysis of isotopic niches. *Quaternary Science Reviews* 215: 1-21.
- 881 Shearer, G, and D Kohl. 1993. "Natural Abundance of <sup>15</sup>N: Fractional Contribution of Two  
882 Sources to a Common Sink and Use of Isotope Discrimination." In *Nitrogen Isotope*  
883 *Techniques*, 89–125. Academic Press.
- 884 Slater, Philip A., Kristin M. Hedman, and Thomas E. Emerson. 2014. "Immigrants at the  
885 Mississippian Polity of Cahokia: Strontium Isotope Evidence for Population Movement."  
886 *Journal of Archaeological Science* 44 (April): 117–27.  
887 <https://doi.org/10.1016/j.jas.2014.01.022>.
- 888 Smith, Gregory James, and Larisa R. G. DeSantis. 2018. "Dietary Ecology of Pleistocene  
889 Mammoths and Mastodons as Inferred from Dental Microwear Textures."  
890 *Palaeogeography, Palaeoclimatology, Palaeoecology* 492 (March): 10–25.  
891 <https://doi.org/10.1016/j.palaeo.2017.11.024>.
- 892 Stevens, Rhiannon, Roger Jacobi, Martin Street, Mietje Germonpre, Nicholas Conard, Susanne  
893 Munzel, Robert E. M. Hedges. 2008. Nitrogen isotope analyses of reindeer (*Rangifer*  
894 *tarandus*), 45,000 BP to 9,000 BP: Palaeoenvironmental reconstructions.  
895 *Palaeogeography, Palaeoclimatology, Palaeoecology* 262: 32-45.
- 896 Stuart, A. J., P. A. Kosintsev, T. F. G. Higham, and A. M. Lister. 2004. "Pleistocene to Holocene  
897 Extinction Dynamics in Giant Deer and Woolly Mammoth." *Nature* 431 (7009): 684.  
898 <https://doi.org/10.1038/nature02890>.
- 899 Stuart, Anthony J., and Adrian M. Lister. 2011. "Extinction Chronology of the Cave Lion  
900 *Panthera Spelaea*." *Quaternary Science Reviews, Beringia and Beyond: Papers*  
901 *Celebrating the Scientific Career of Andrei Vladimirovich Sher, 1939–2008*, 30 (17):  
902 2329–40. <https://doi.org/10.1016/j.quascirev.2010.04.023>.
- 903 ———. 2012. "Extinction Chronology of the Woolly Rhinoceros *Coelodonta Antiquitatis* in the  
904 Context of Late Quaternary Megafaunal Extinctions in Northern Eurasia." *Quaternary*  
905 *Science Reviews* 51 (September): 1–17. <https://doi.org/10.1016/j.quascirev.2012.06.007>.
- 906 Stuart, Anthony John. 2015. "Late Quaternary Megafaunal Extinctions on the Continents: A  
907 Short Review." *Geological Journal* 50 (3): 338–63. <https://doi.org/10.1002/gj.2633>.
- 908 Surovell, Todd A., Spencer R. Pelton, Richard Anderson-Sprecher, and Adam D. Myers. 2016.  
909 "Test of Martin's Overkill Hypothesis Using Radiocarbon Dates on Extinct Megafauna."  
910 *Proceedings of the National Academy of Sciences* 113 (4): 886–91.  
911 <https://doi.org/10.1073/pnas.1504020112>.
- 912 Surovell, Todd, Nicole Waguespack, and P. Jeffrey Brantingham. 2005. "Global Archaeological  
913 Evidence for Proboscidean Overkill." *Proceedings of the National Academy of Sciences*  
914 102 (17): 6231–36. <https://doi.org/10.1073/pnas.0501947102>.
- 915 Szpak, Paul, Darren R. Gröcke, Regis Debruyne, Ross D. E. MacPhee, R. Dale Guthrie, Duane  
916 Froese, Grant D. Zazula, William P. Patterson, and Hendrik N. Poinar. 2010. "Regional  
917 Differences in Bone Collagen  $\delta^{13}\text{C}$  and  $\delta^{15}\text{N}$  of Pleistocene Mammoths: Implications for



- 918 Paleoecology of the Mammoth Steppe.” *Palaeogeography, Palaeoclimatology,*  
919 *Palaeoecology* 286 (1): 88–96. <https://doi.org/10.1016/j.palaeo.2009.12.009>.
- 920 Teale, Chelsea L., and Norton G. Miller. 2012. “Mastodon Herbivory in Mid-Latitude Late-  
921 Pleistocene Boreal Forests of Eastern North America.” *Quaternary Research* 78 (1): 72–  
922 81. <https://doi.org/10.1016/j.yqres.2012.04.002>.
- 923 Tuross, Noreen, Marilyn L Fogel, and P. E Hare. 1988. “Variability in the Preservation of the  
924 Isotopic Composition of Collagen from Fossil Bone.” *Geochimica et Cosmochimica Acta*  
925 52 (4): 929–35. [https://doi.org/10.1016/0016-7037\(88\)90364-X](https://doi.org/10.1016/0016-7037(88)90364-X).
- 926 Uno, Kevin T., Jay Quade, Daniel C. Fisher, George Wittemyer, Iain Douglas-Hamilton, Samuel  
927 Andanje, Patrick Omondi, Moses Litoroh, and Thure E. Cerling. 2013. “Bomb-Curve  
928 Radiocarbon Measurement of Recent Biologic Tissues and Applications to Wildlife  
929 Forensics and Stable Isotope (Paleo)Ecology.” *Proceedings of the National Academy of*  
930 *Sciences* 110 (29): 11736–41. <https://doi.org/10.1073/pnas.1302226110>.
- 931 Valeix, Marion, Hervé Fritz, Rodolphe Sabatier, Felix Murindagomo, David Cumming, and  
932 Patrick Duncan. 2011. “Elephant-Induced Structural Changes in the Vegetation and  
933 Habitat Selection by Large Herbivores in an African Savanna.” *Biological Conservation*  
934 144 (2): 902–12. <https://doi.org/10.1016/j.biocon.2010.10.029>.
- 935 Voelker, Steven L., Michael C. Stambaugh, Richard P. Guyette, Xiahong Feng, David a.  
936 Grimley, Steven W. Leavitt, Irina Panyushkina, et al. 2015. “Deglacial Hydroclimate of  
937 Midcontinental North America.” *Quaternary Research* 83 (2): 336–344.  
938 <https://doi.org/10.1016/j.yqres.2015.01.001>.
- 939 Warinner, Christina, and Noreen Tuross. 2010. “Brief Communication: Tissue Isotopic  
940 Enrichment Associated with Growth Depression in a Pig: Implications for Archaeology  
941 and Ecology.” *American Journal of Physical Anthropology* 141 (3): 486–493.  
942 <https://doi.org/10.1002/ajpa.21222>.
- 943 Widga, Chris, Stacey N. Lengyel, Jeffrey Saunders, Gregory Hodgins, J. Douglas Walker, and  
944 Alan D. Wanamaker. 2017a. “Late Pleistocene Proboscidean Population Dynamics in the  
945 North American Midcontinent.” *Boreas* 46 (4): 772–82.  
946 <https://doi.org/10.1111/bor.12235>.
- 947 Widga, Chris, J. Douglas Walker, and Andrew Boehm. 2017b. “Variability in Bioavailable  
948  $^{87}\text{Sr}/^{86}\text{Sr}$  in the North American Midcontinent.” *Open Quaternary* 3 (1): 4.  
949 <https://doi.org/10.5334/oq.32>.
- 950 Wolverton, Steve, R Lee Lyman, James H Kennedy, and Thomas W La Point. 2009. “The  
951 Terminal Pleistocene Extinctions in North America, Hypermorph Evolution, and the  
952 Dynamic Equilibrium Model.” *Journal of Ethnobiology* 29 (1): 28–63.  
953 <https://doi.org/10.2993/0278-0771-29.1.28>.
- 954 Zazzo, Antoine, Marie Balasse, and William P. W.P. William P Patterson. 2006. “The  
955 Reconstruction of Mammal Individual History: Refining High-Resolution Isotope Record  
956 in Bovine Tooth Dentine.” *Journal of Archaeological Science* 33 (8): 1177–1187.  
957 <https://doi.org/10.1016/j.jas.2005.12.006>.
- 958



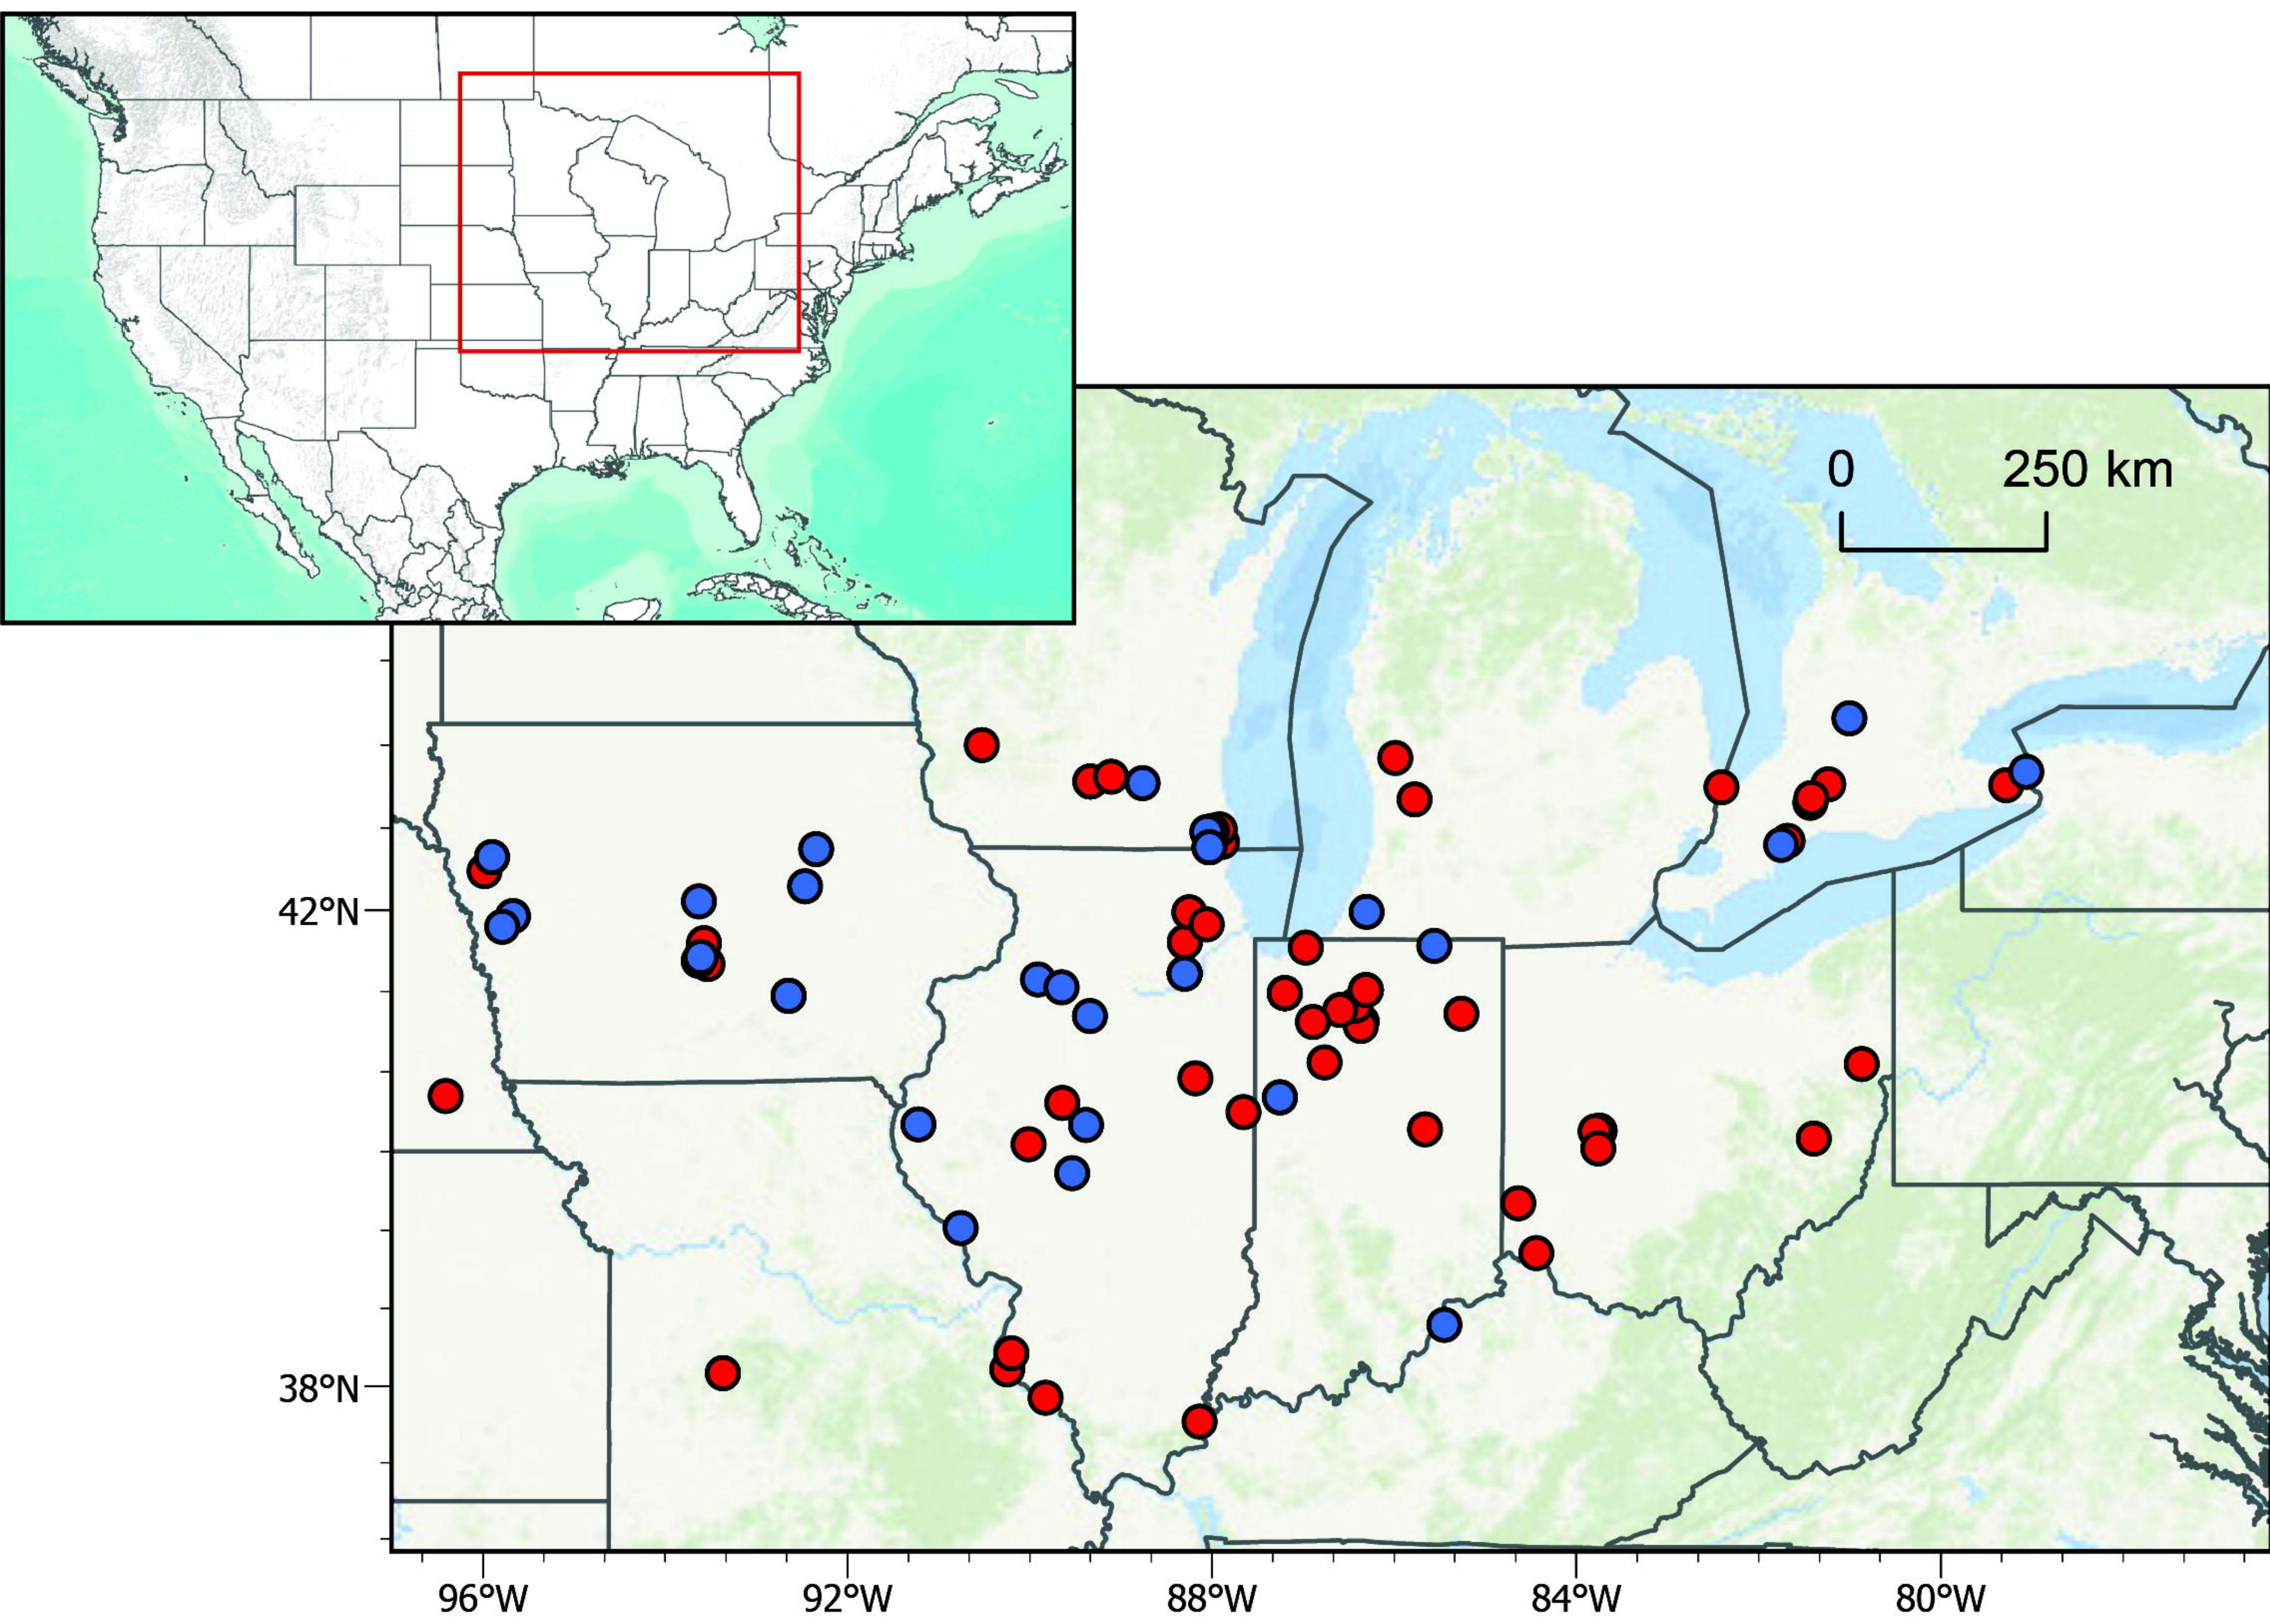



Serial downtooth Samples

Micromilled downtooth samples

Set 1 (10 samples)

Set 2 (10 samples)

Set 3 (10 samples)

Set 4 (10 samples)

bioRxiv preprint doi: <https://doi.org/10.1101/2020.01.08.896614>; this version posted May 28, 2020. The copyright holder for this preprint (which was not certified by peer review) is the author/funder, who has granted bioRxiv a license to display the preprint in perpetuity. It is made available under aCC-BY-NC-ND 4.0 International license.

Cross Section of enamel sampling set showing milling depth.

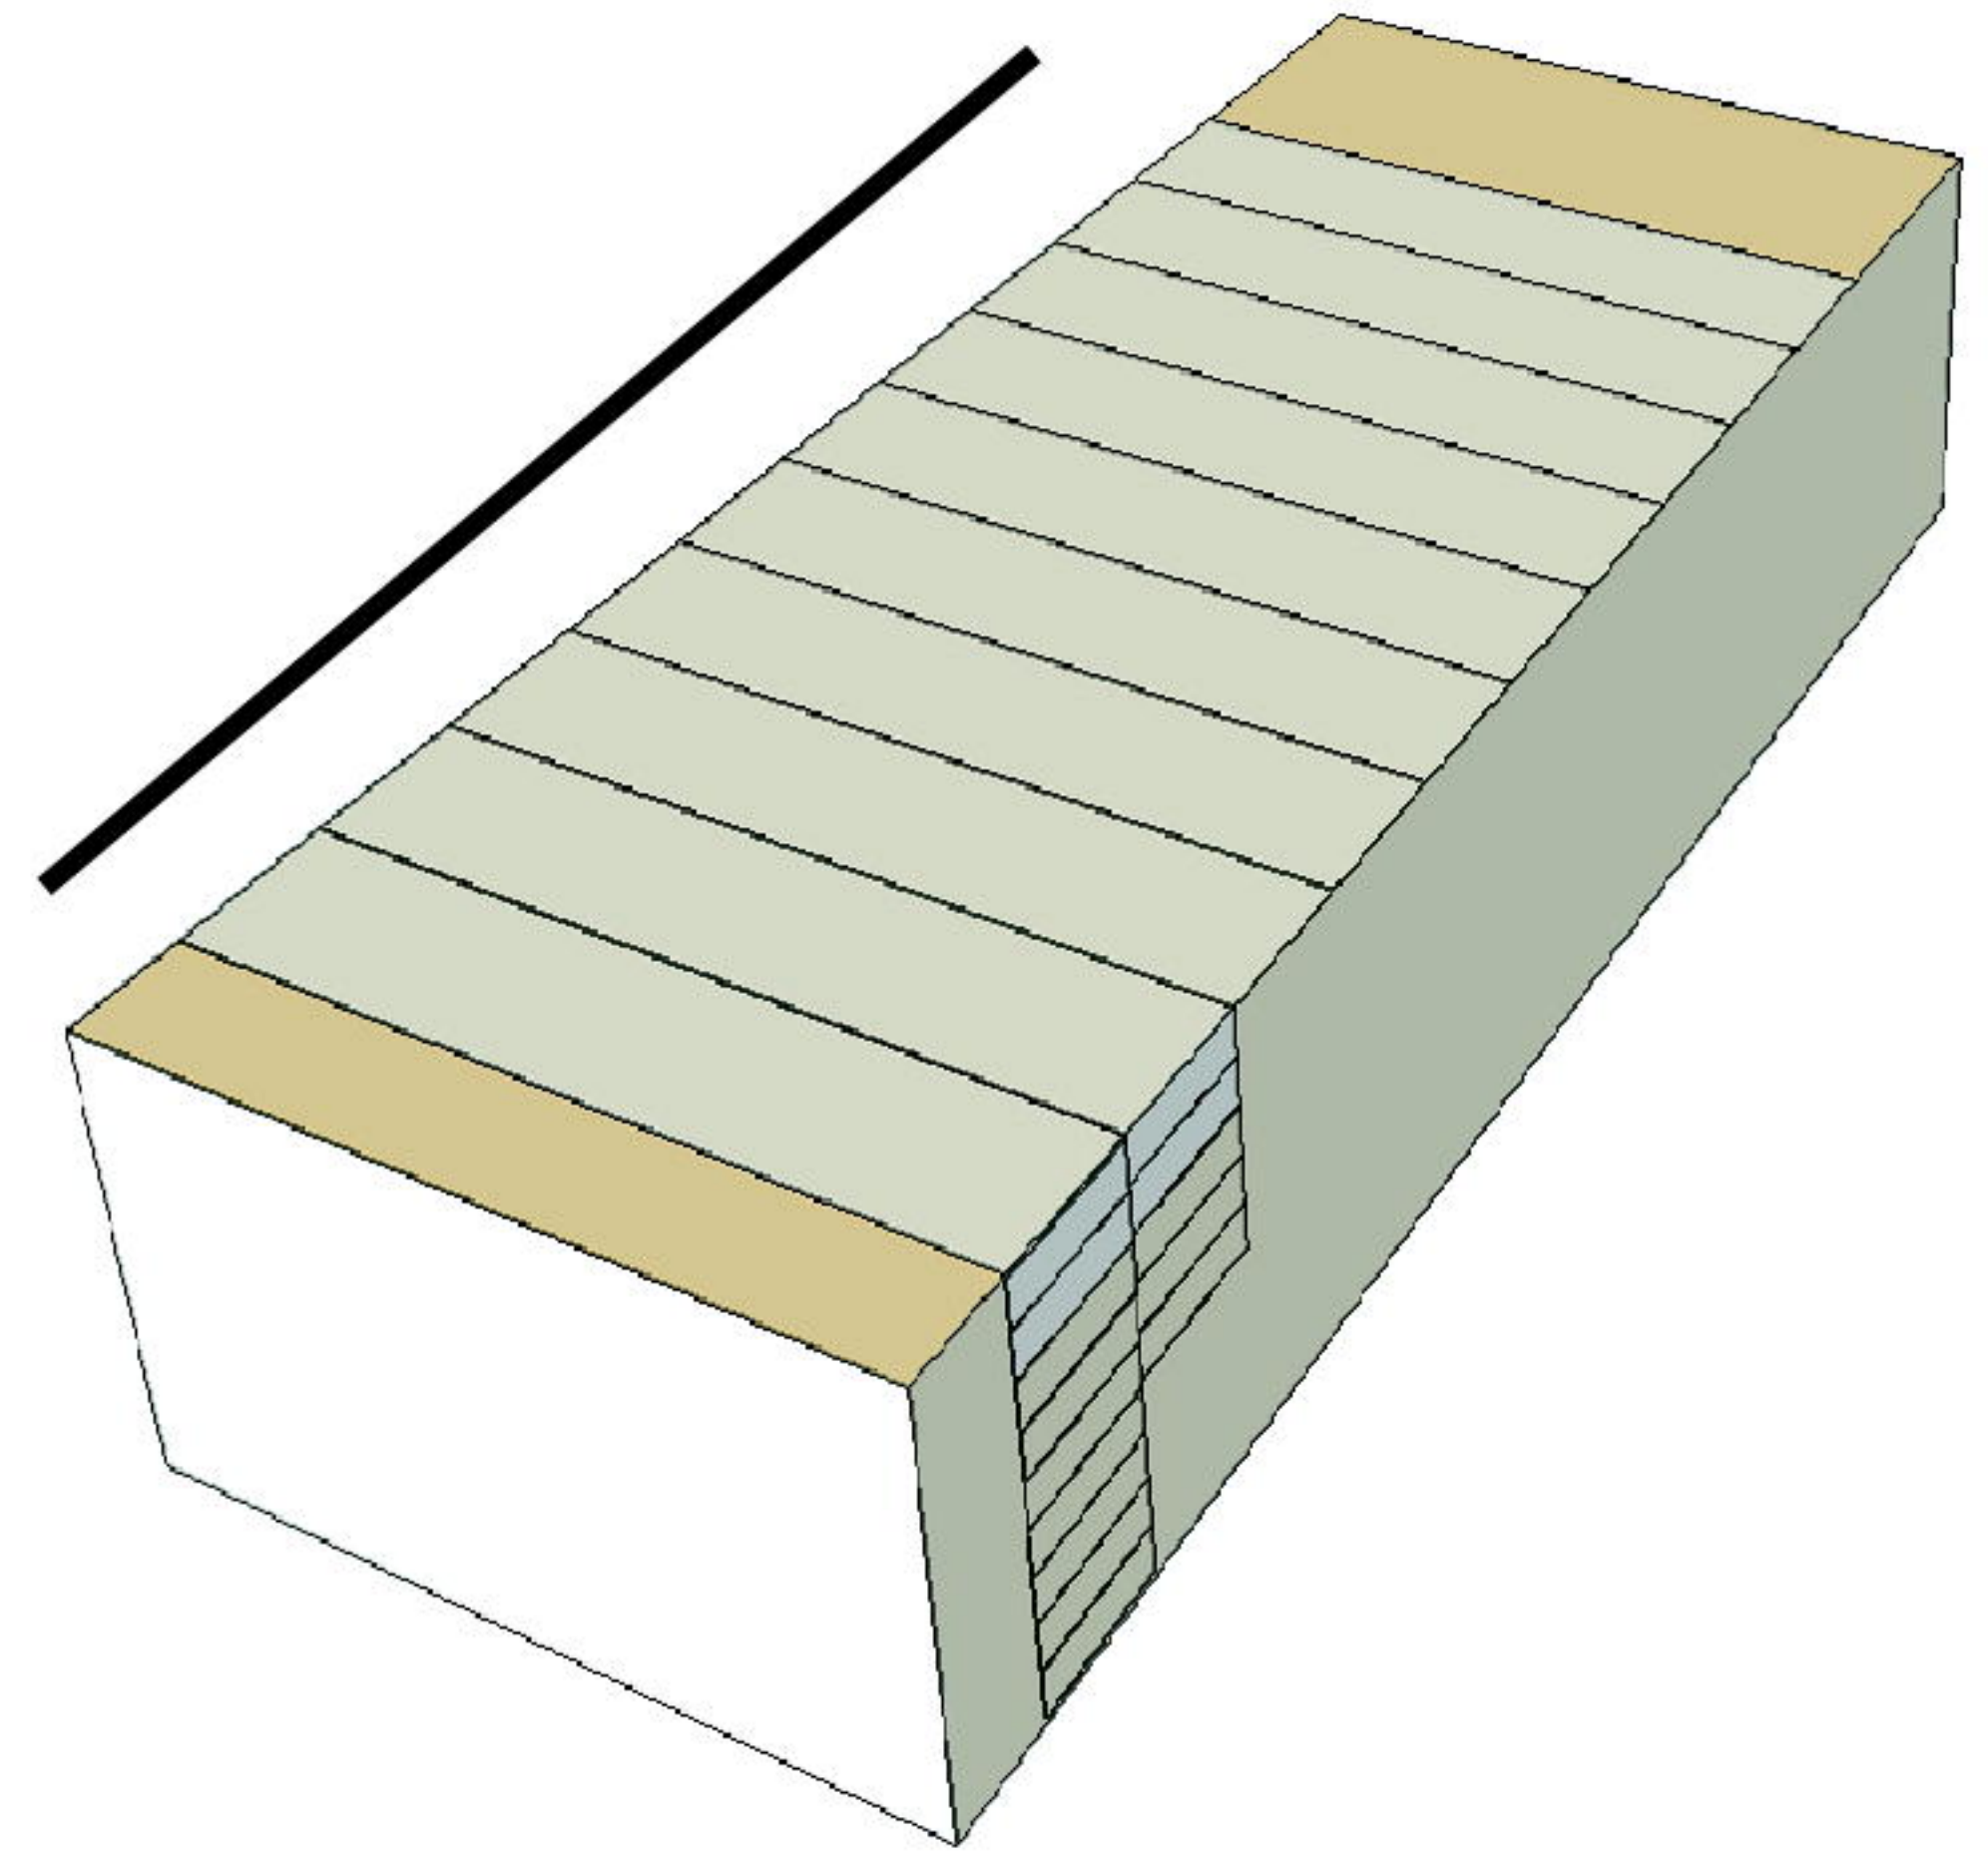

Enamel Sampling set.

Set 2 Sample 10 Location

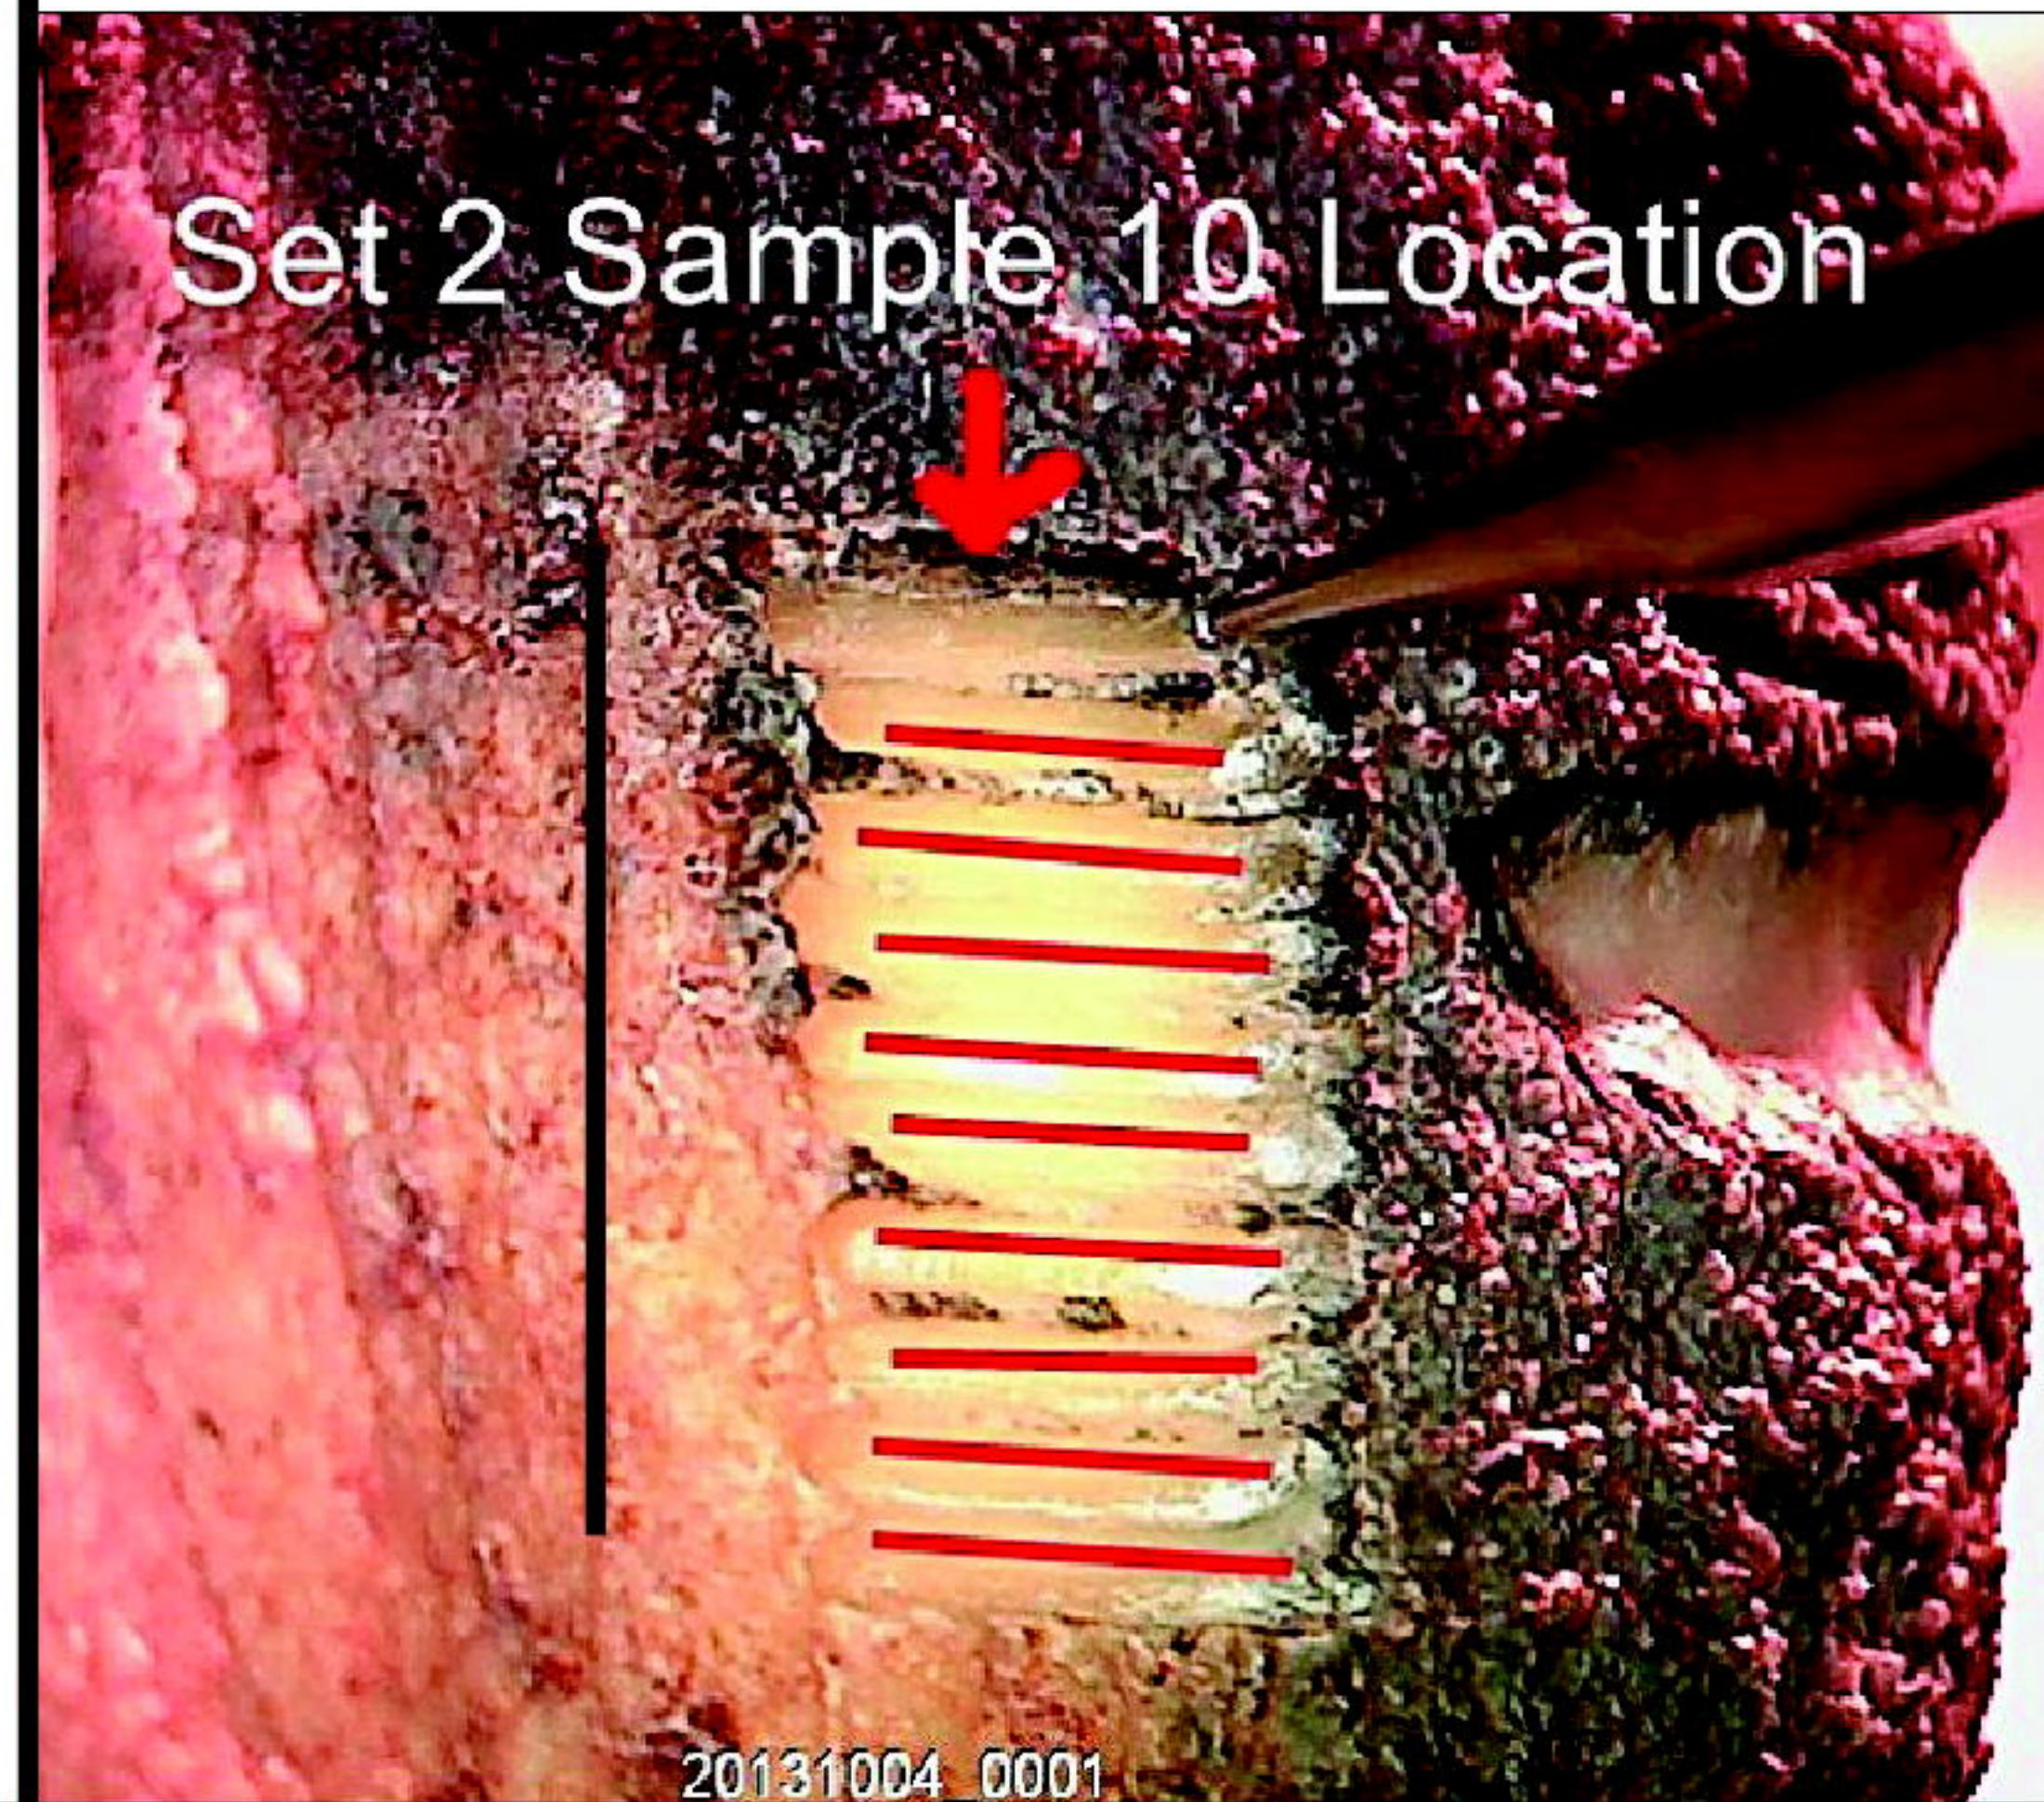

20131004 0001



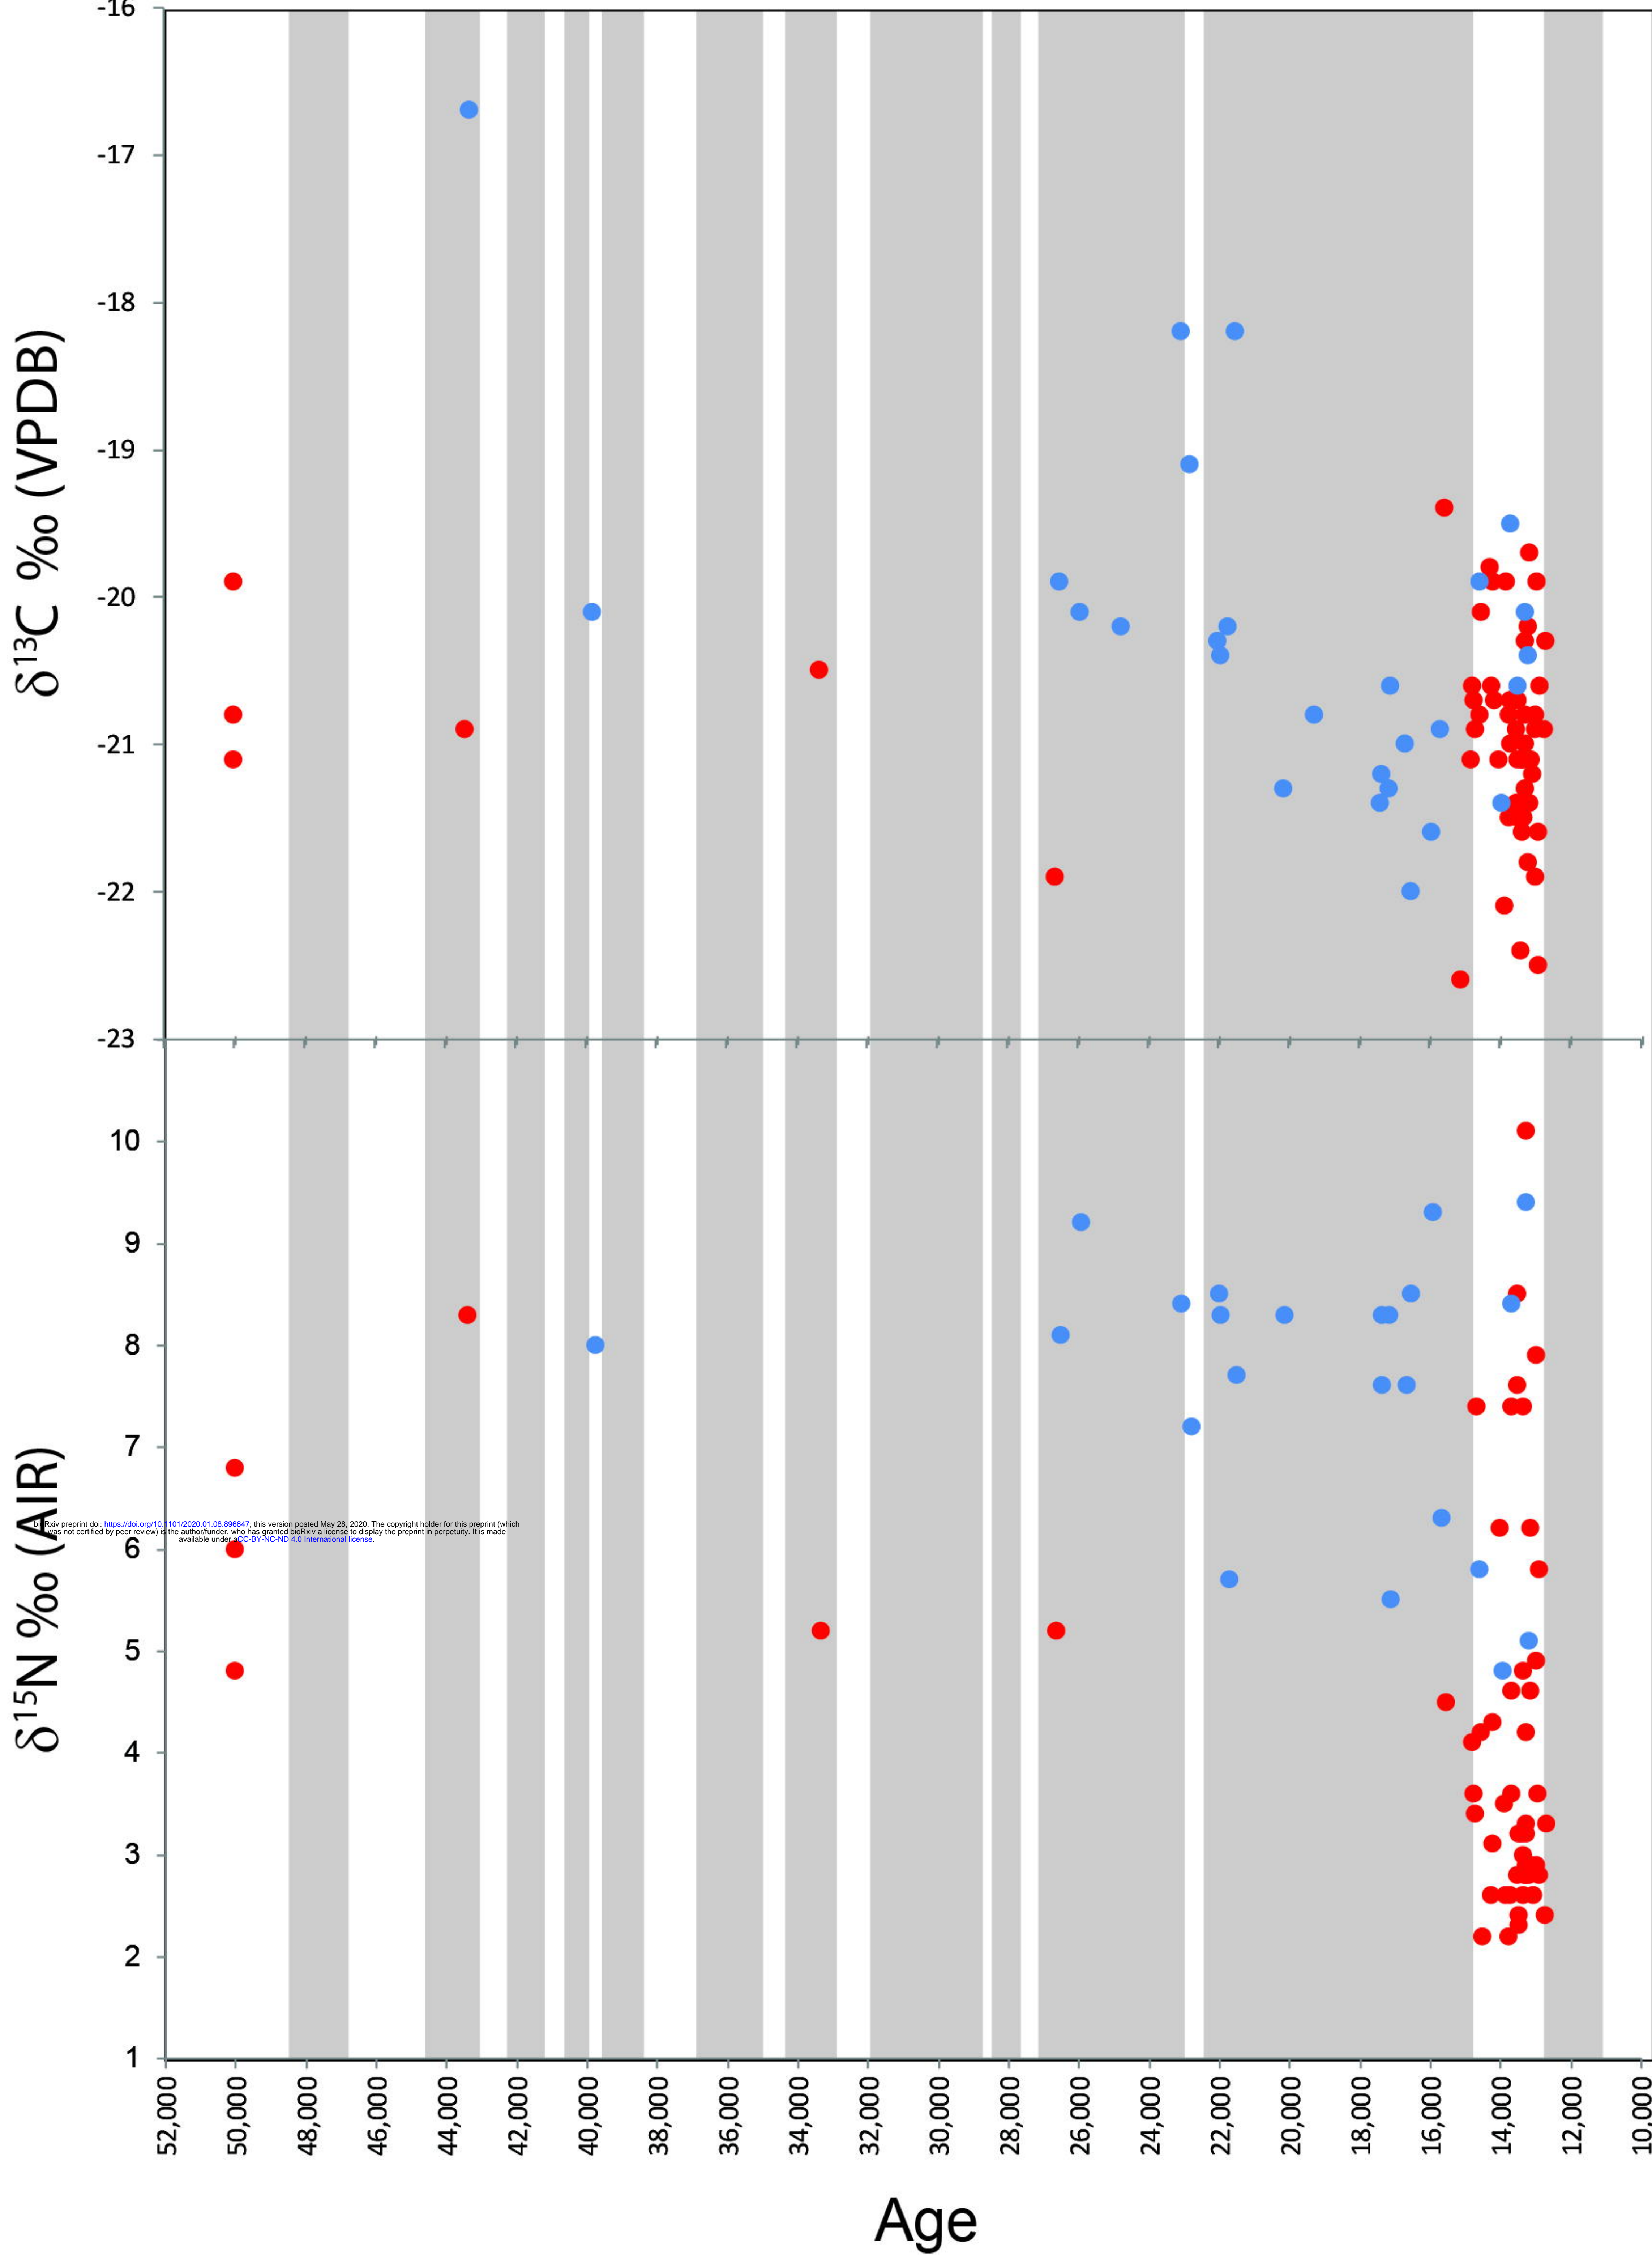



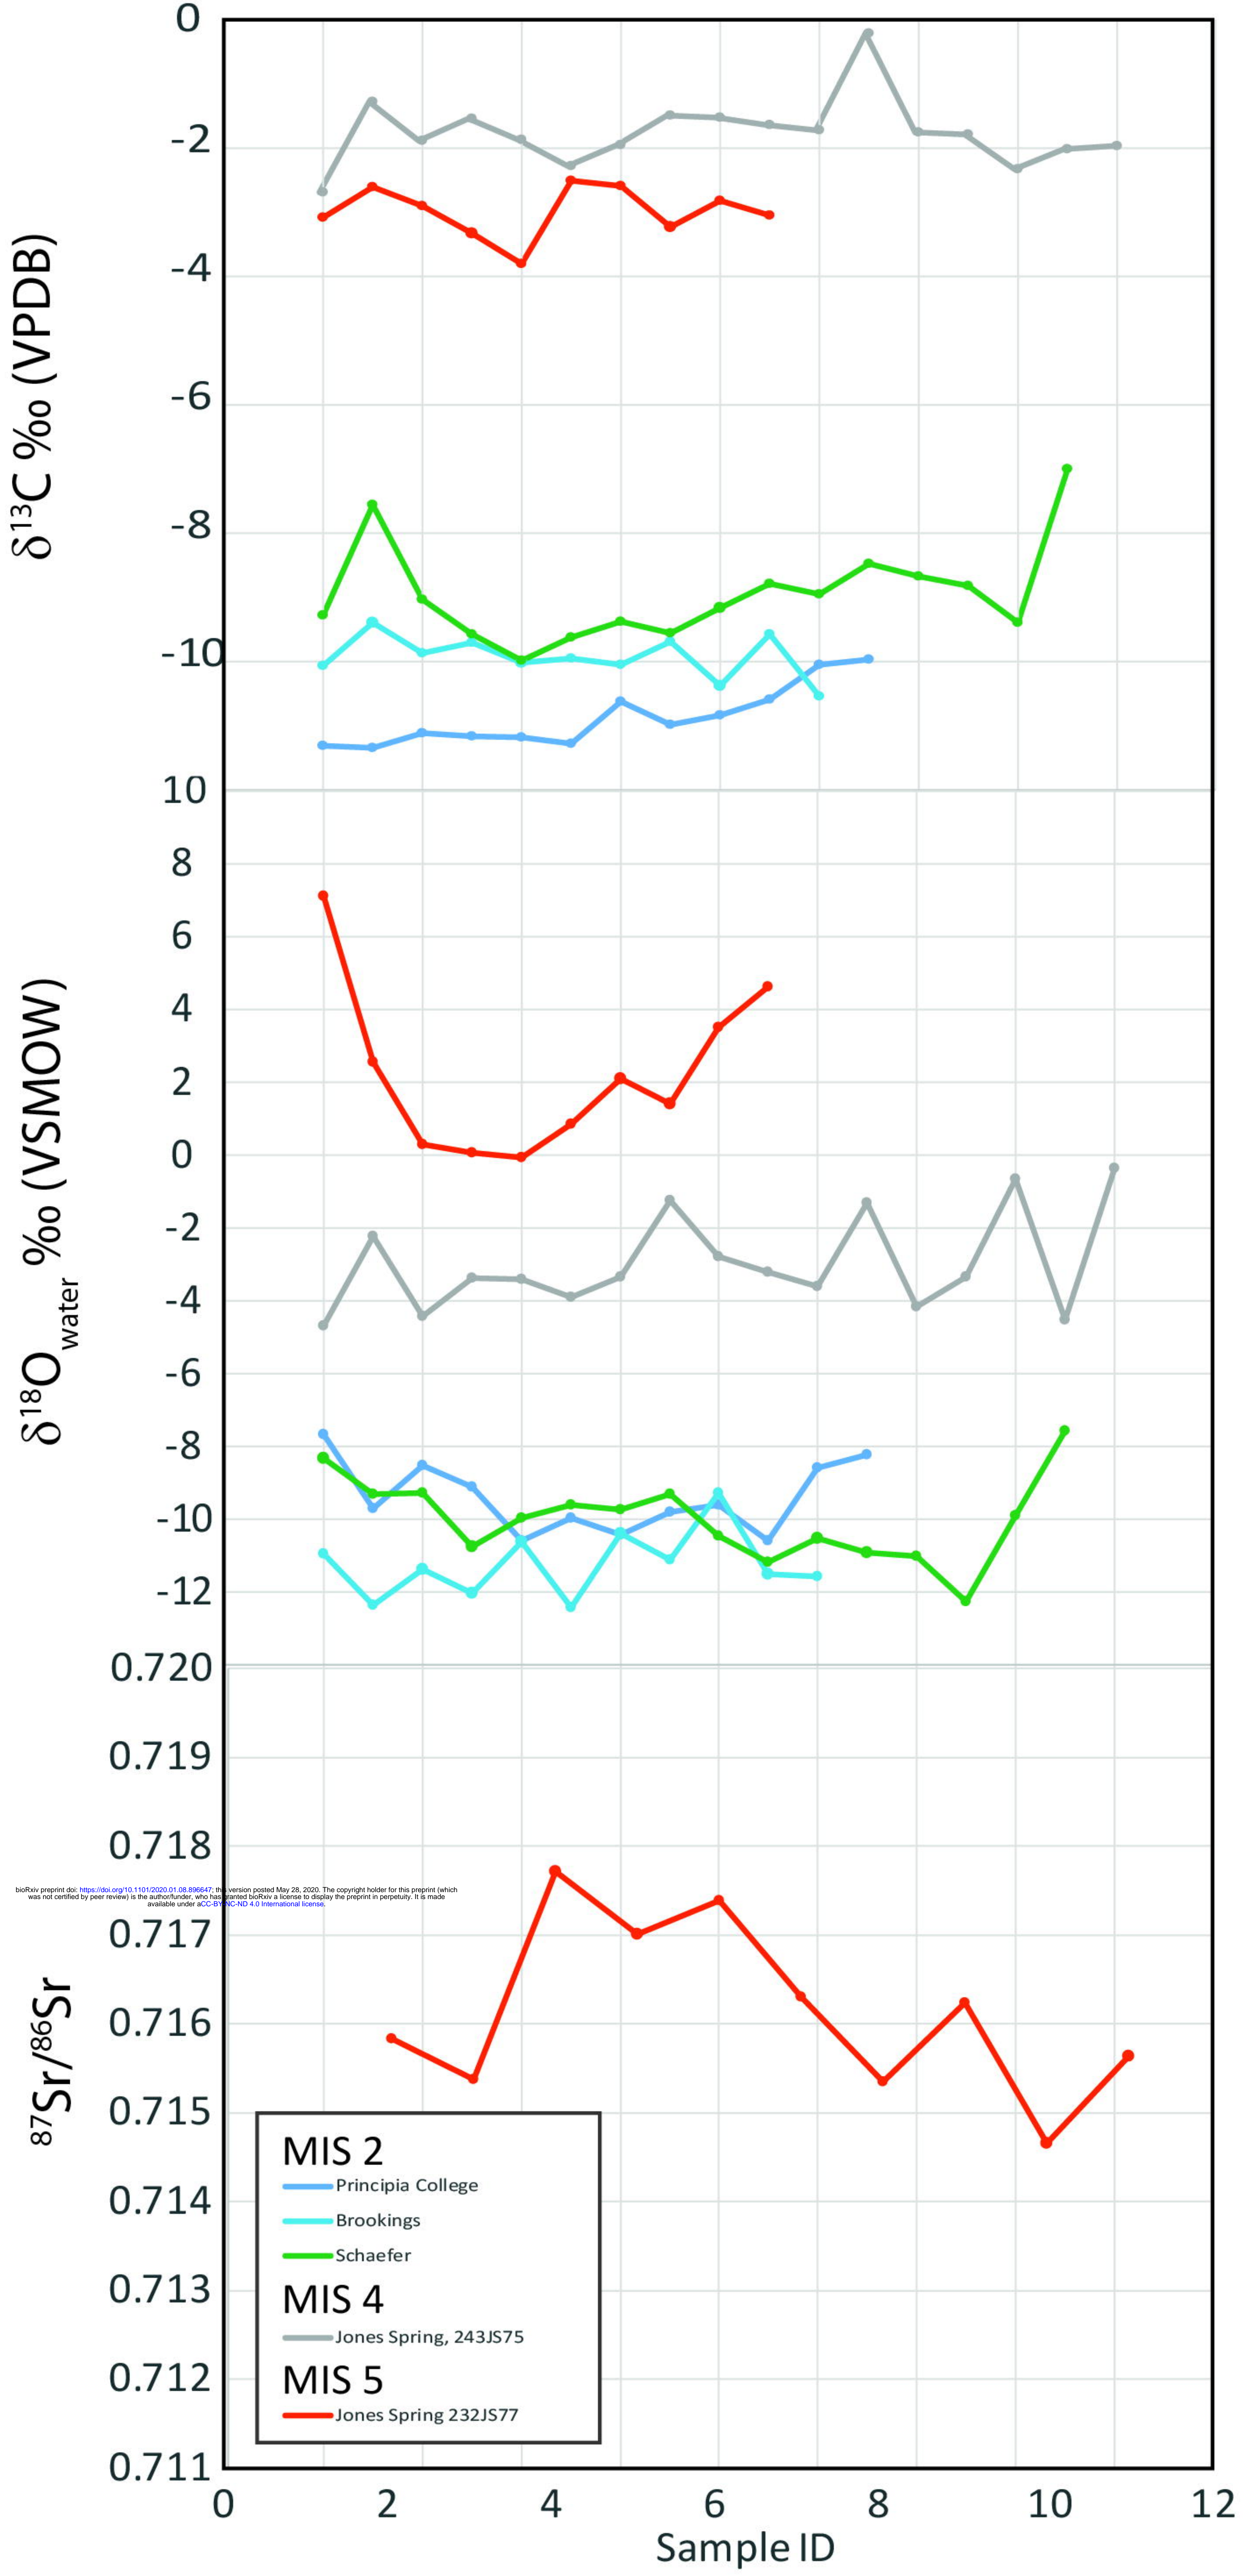



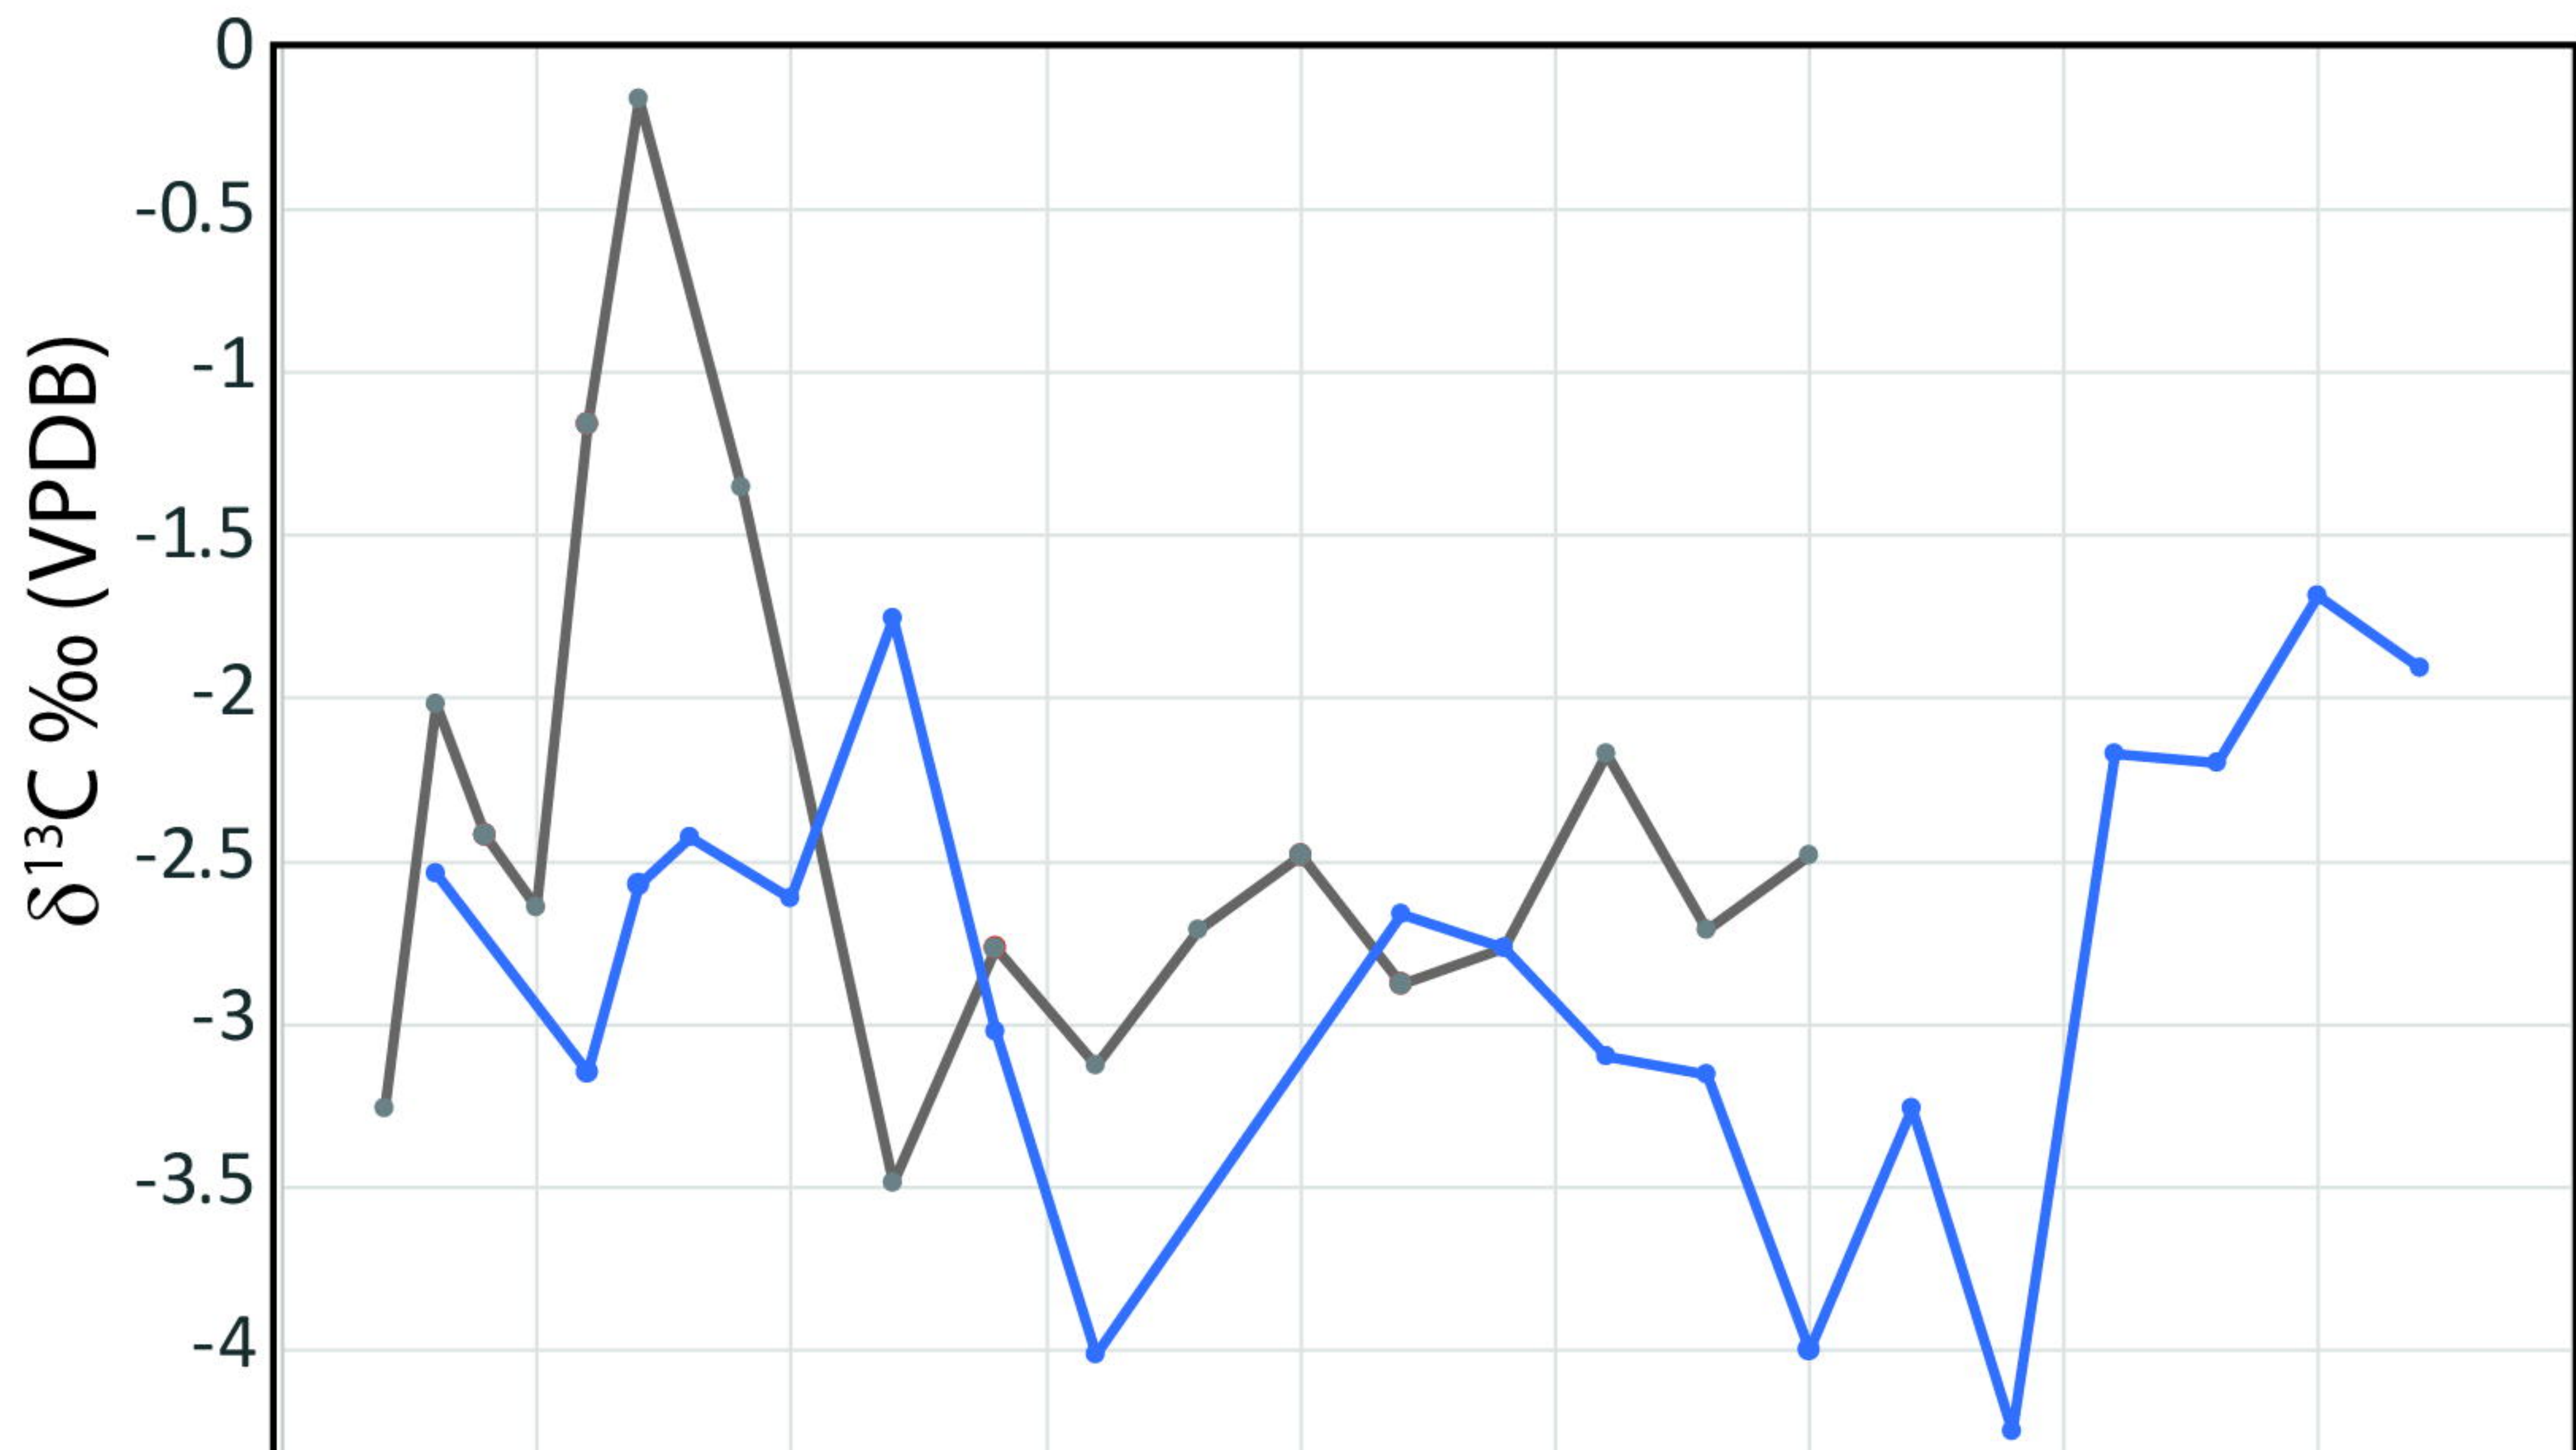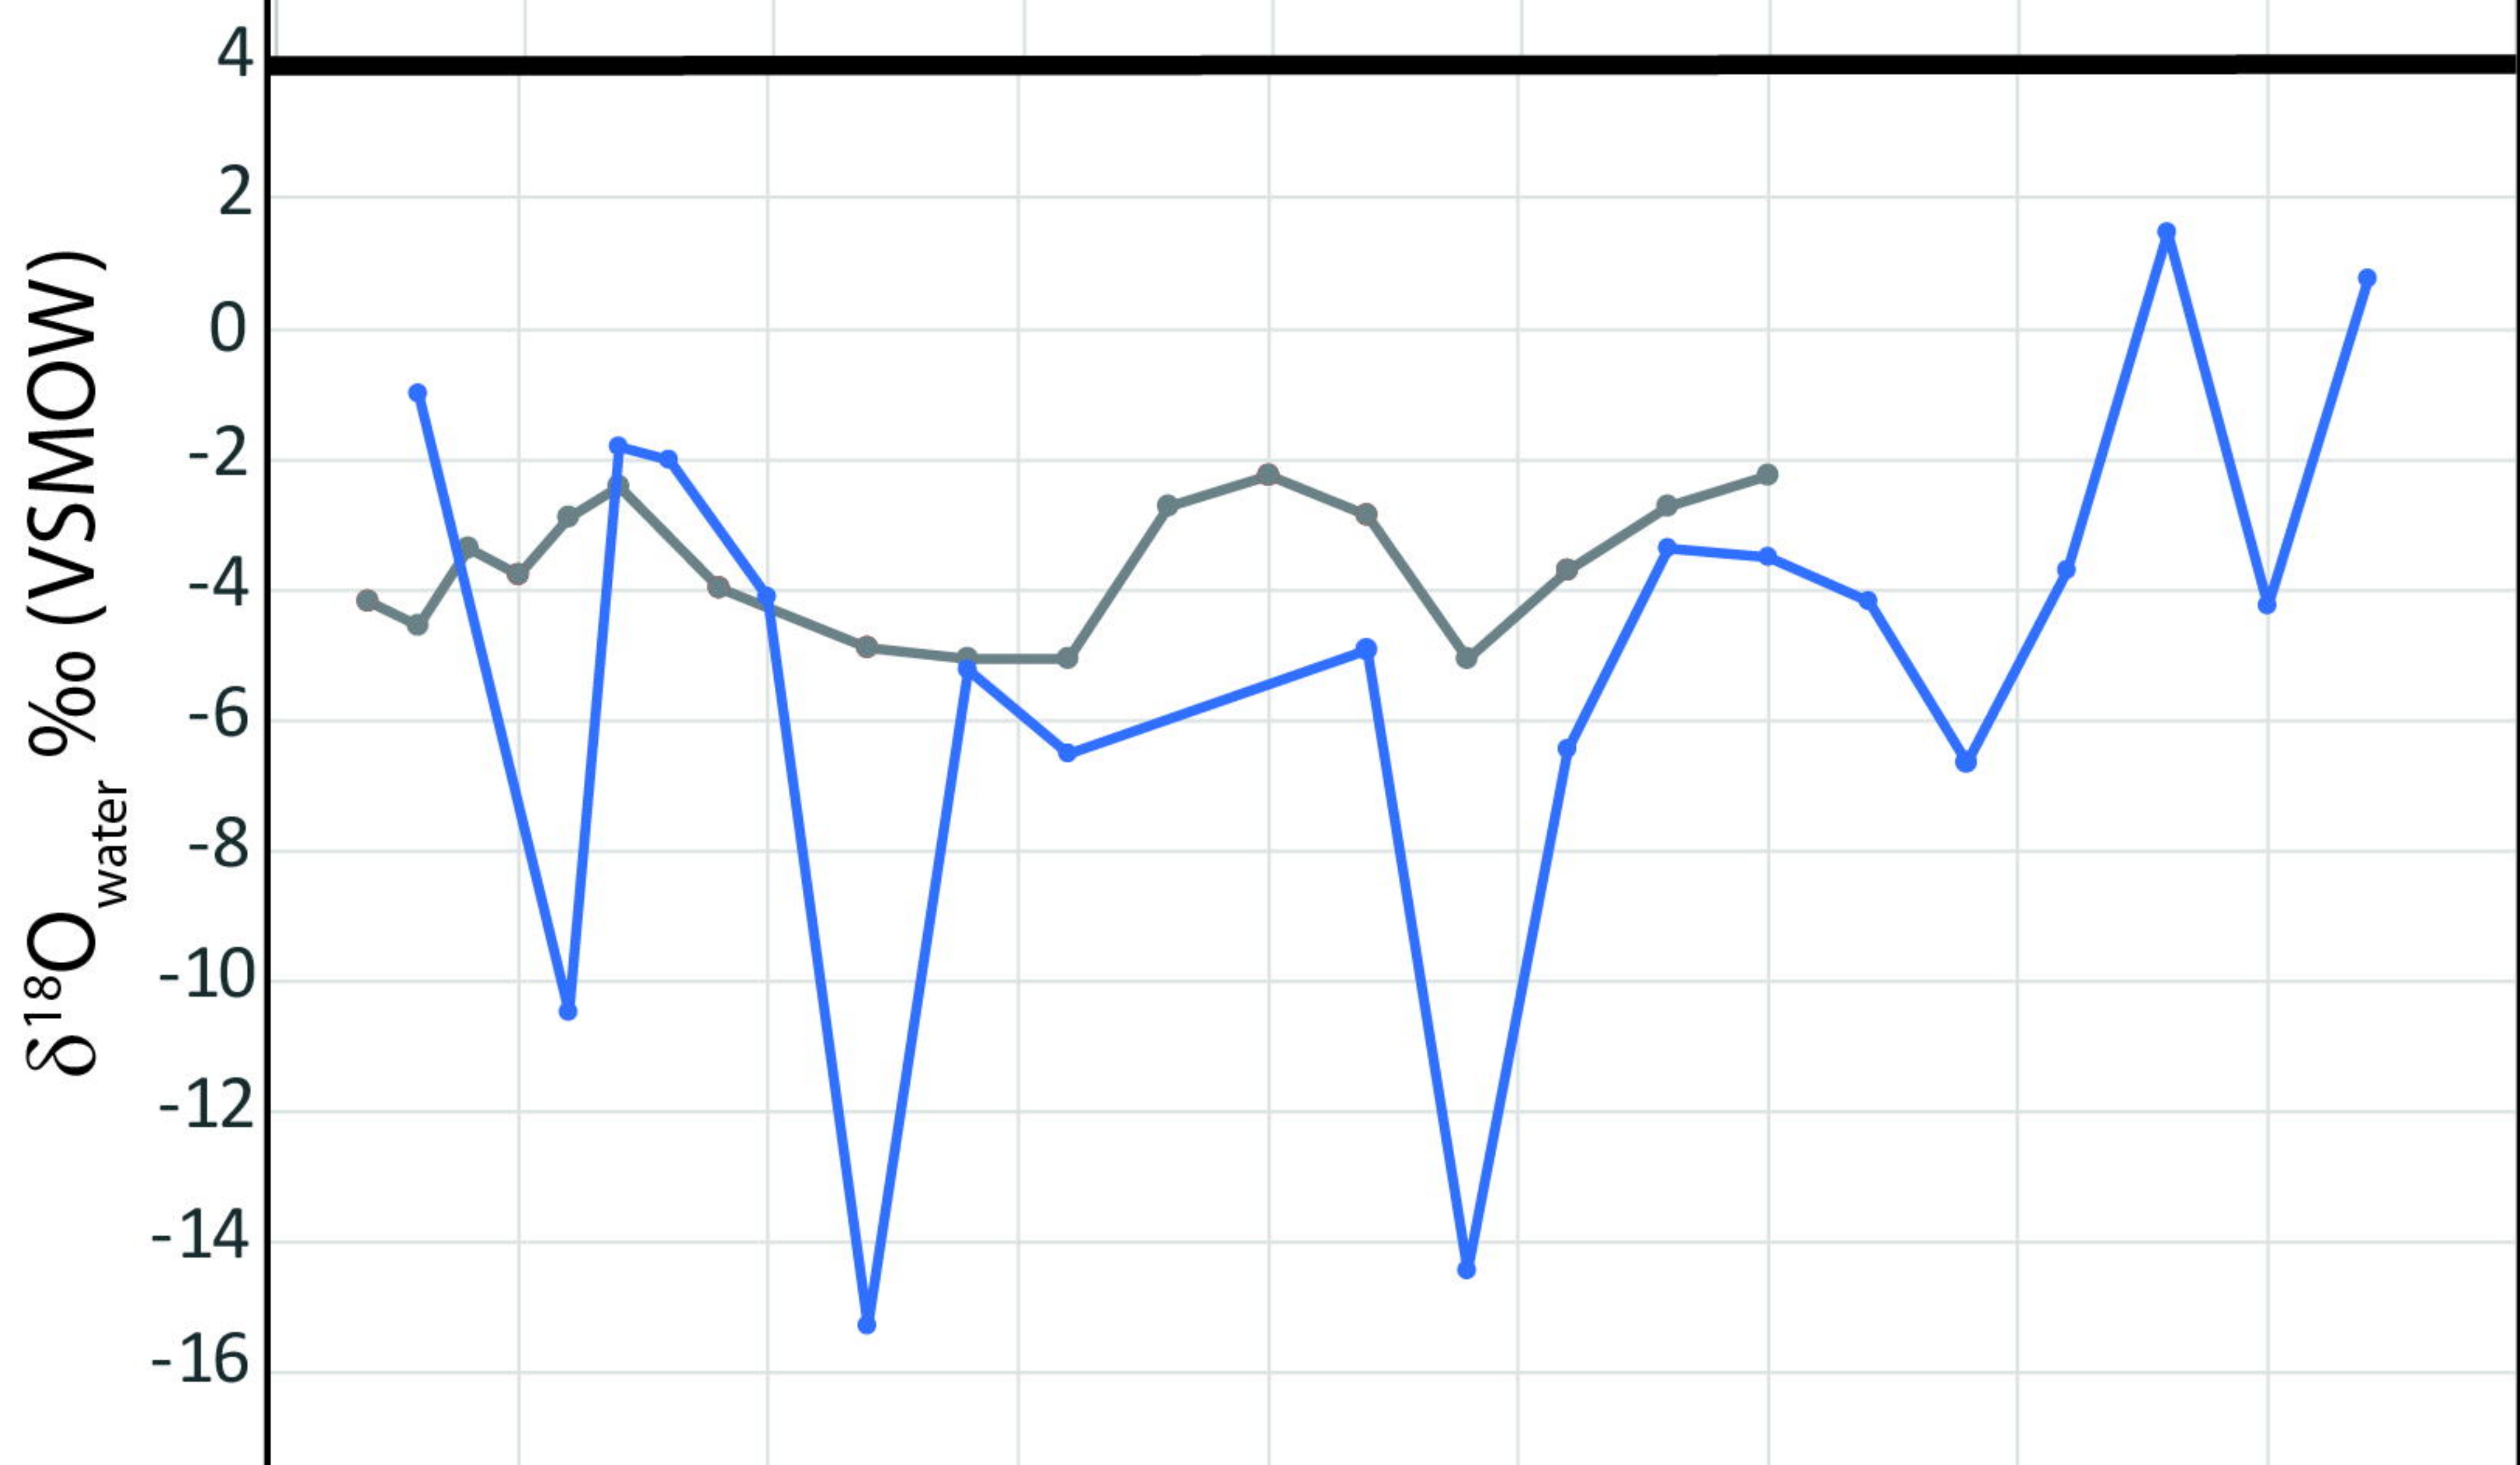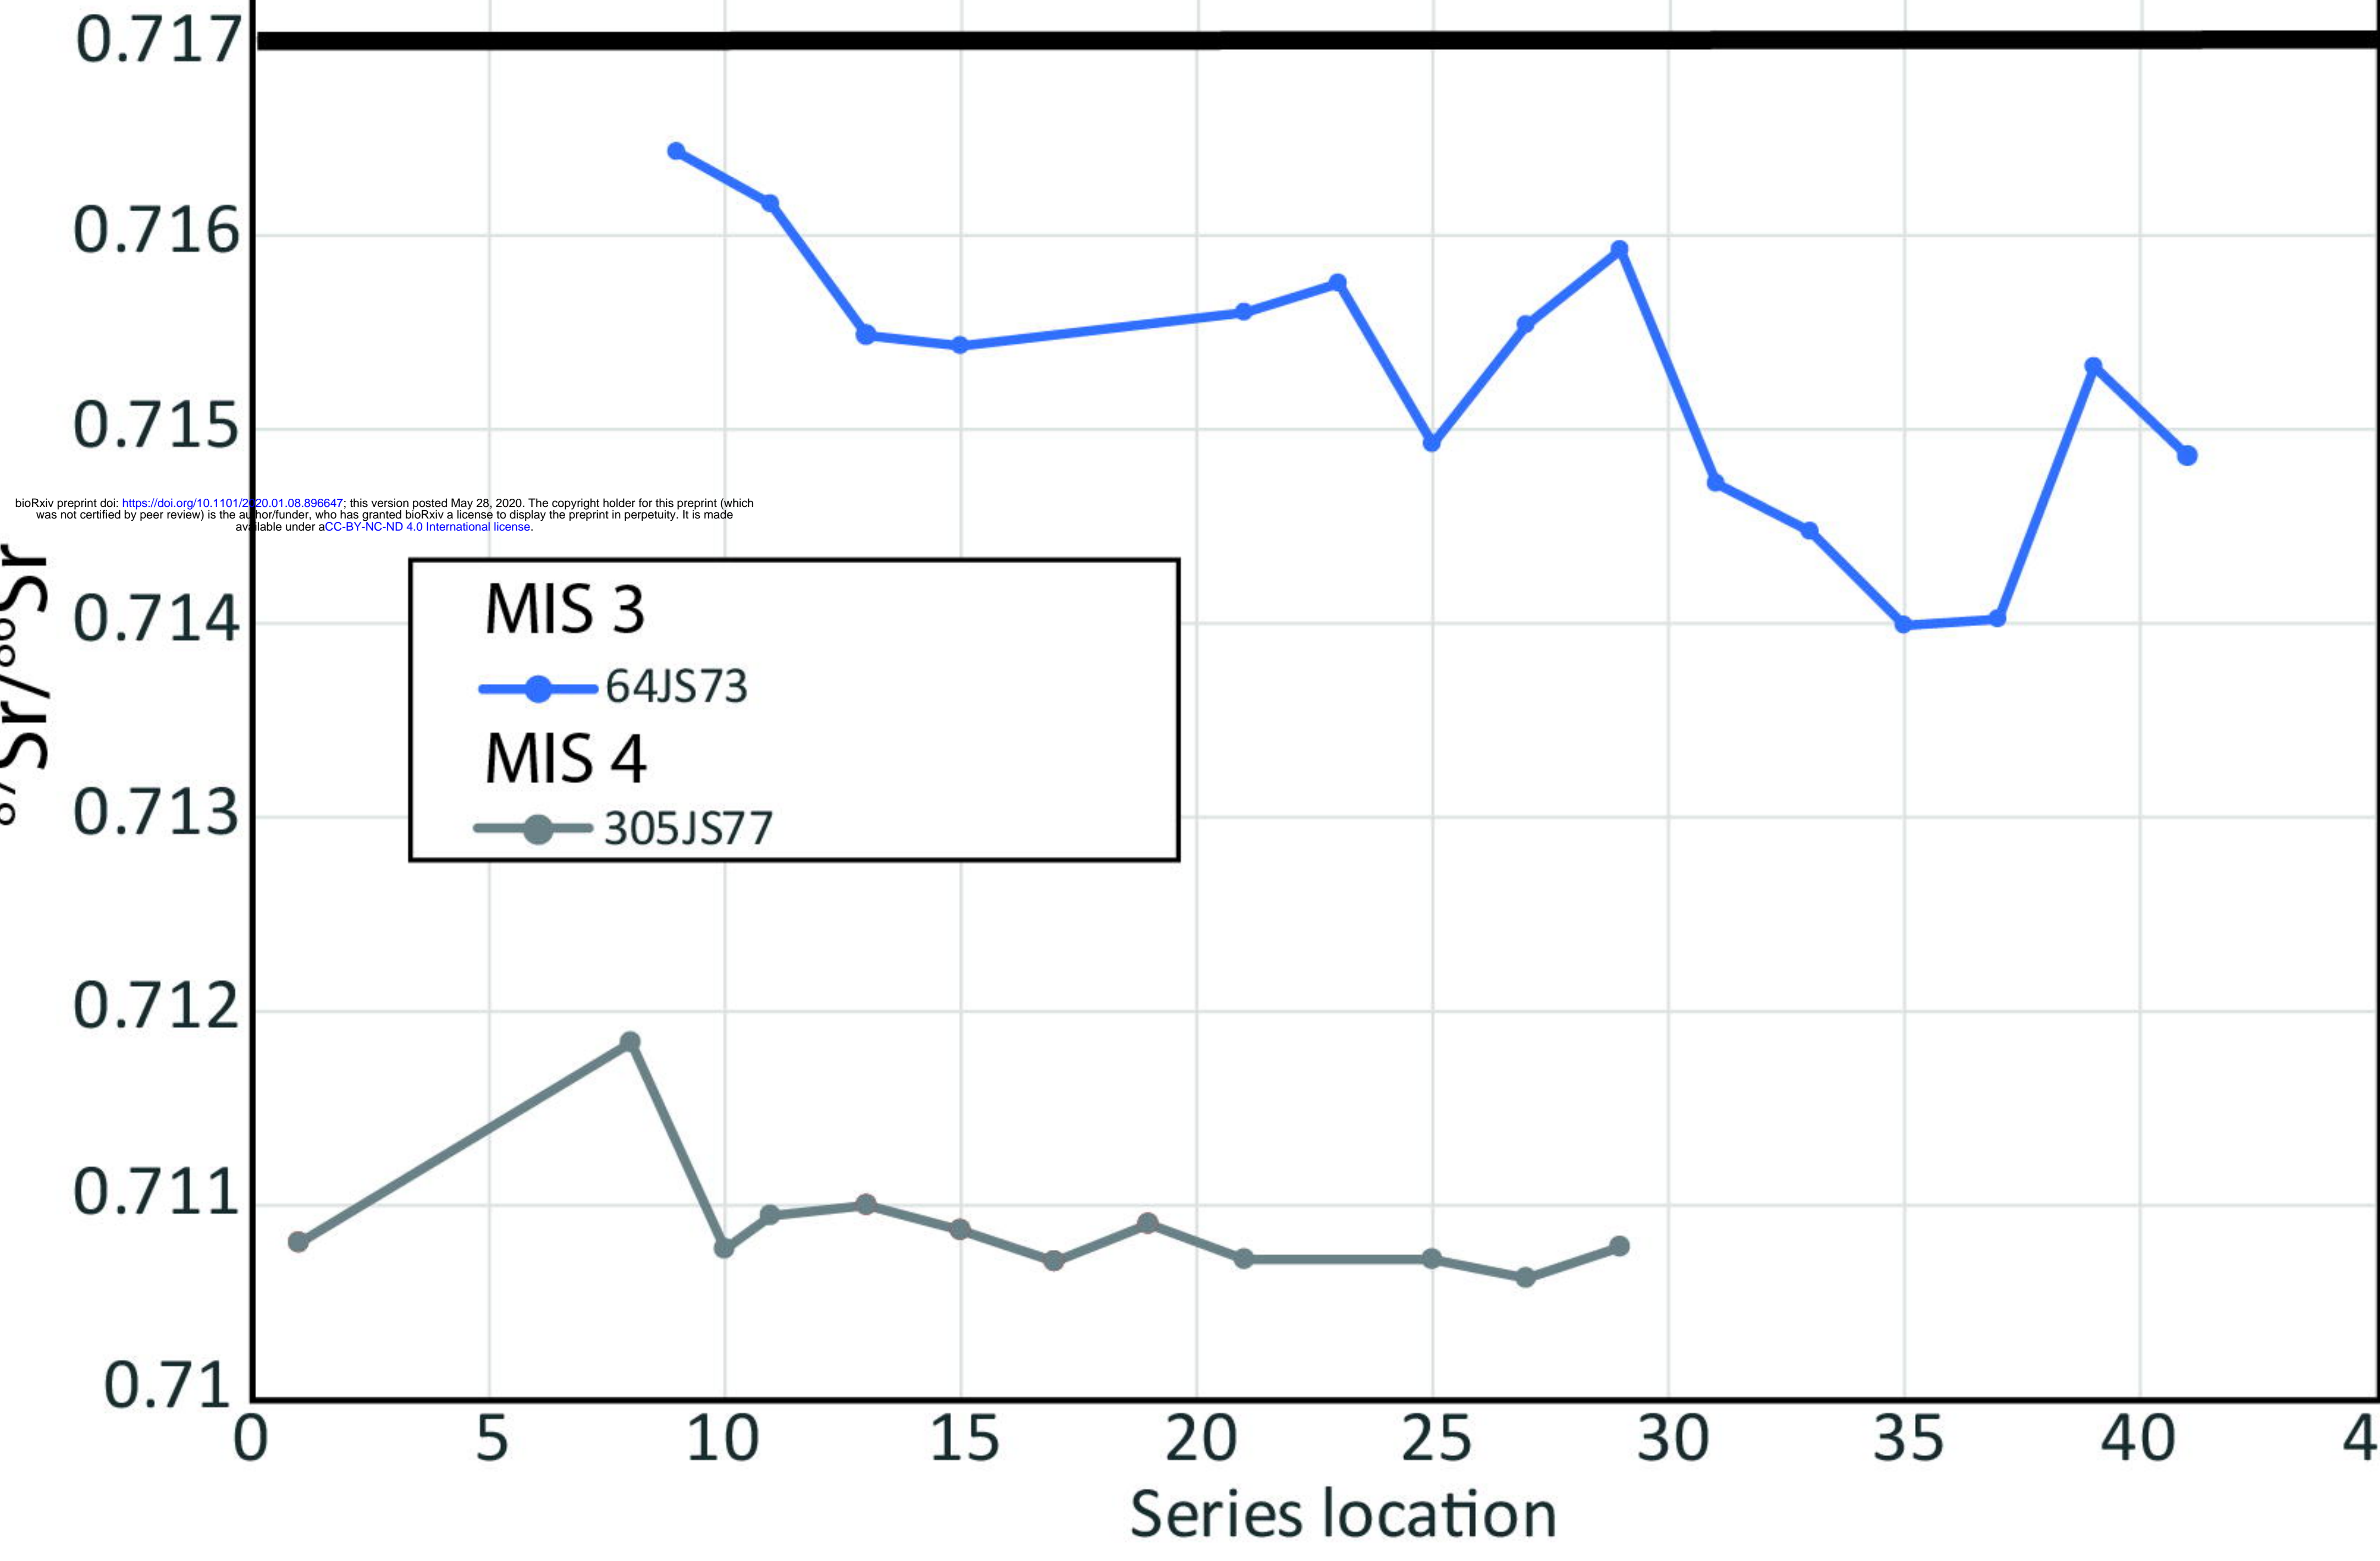

bioRxiv preprint doi: <https://doi.org/10.1101/2020.01.09.896647>; this version posted May 28, 2020. The copyright holder for this preprint (which was not certified by peer review) is the author/funder, who has granted bioRxiv a license to display the preprint in perpetuity. It is made available under aCC-BY-NC-ND 4.0 International license.

MIS 3  
 ● 64JS73  
 MIS 4  
 ● 305JS77



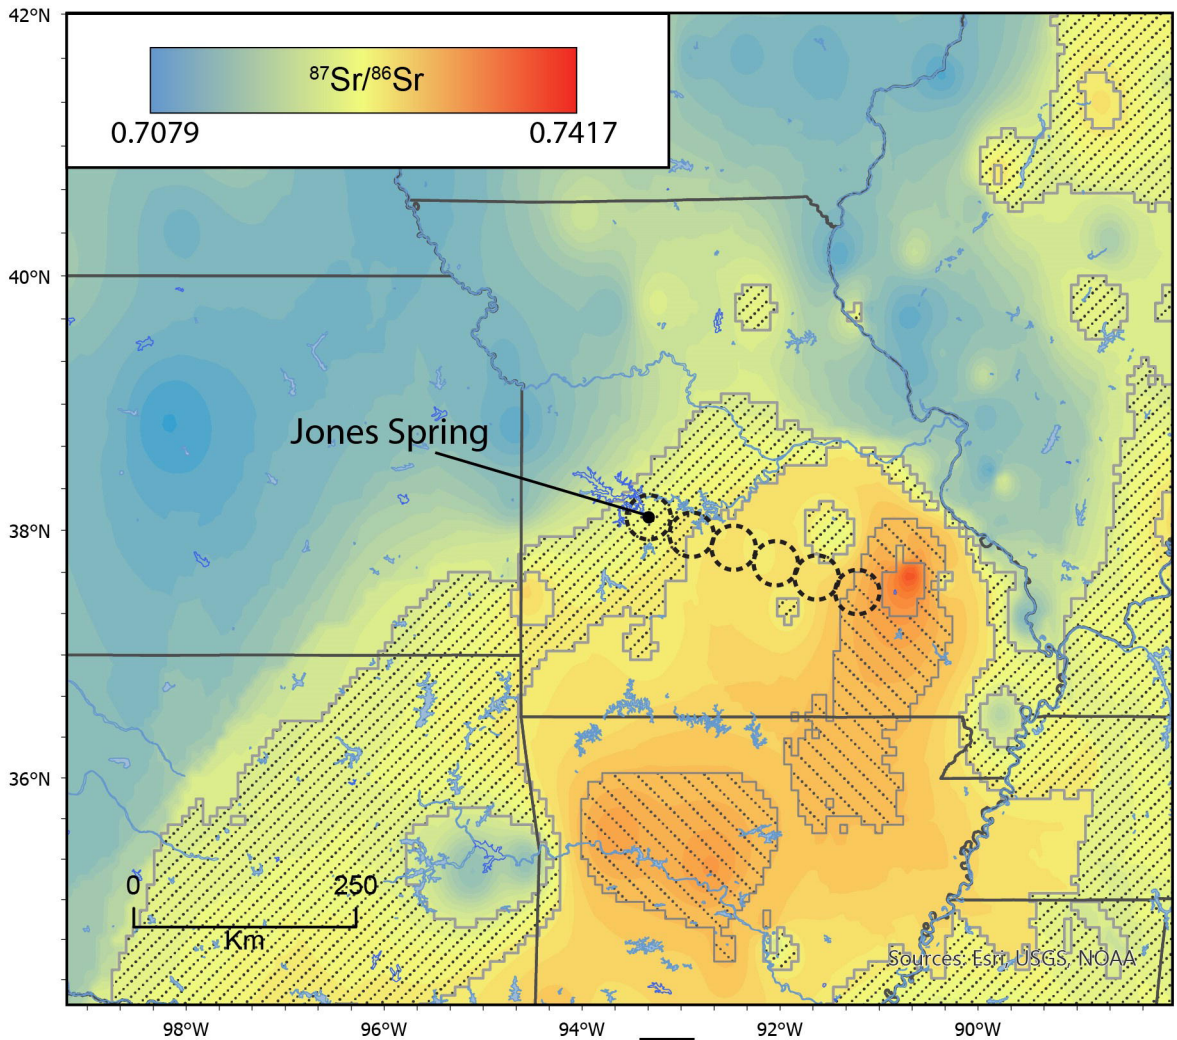

○ (8700 km<sup>2</sup>) in modern elephants (Ngene et al. 2017)

▨ 232JS77 (MIS 5); 64JS73 (MIS 3)

▩ 305JS77 (MIS 4)



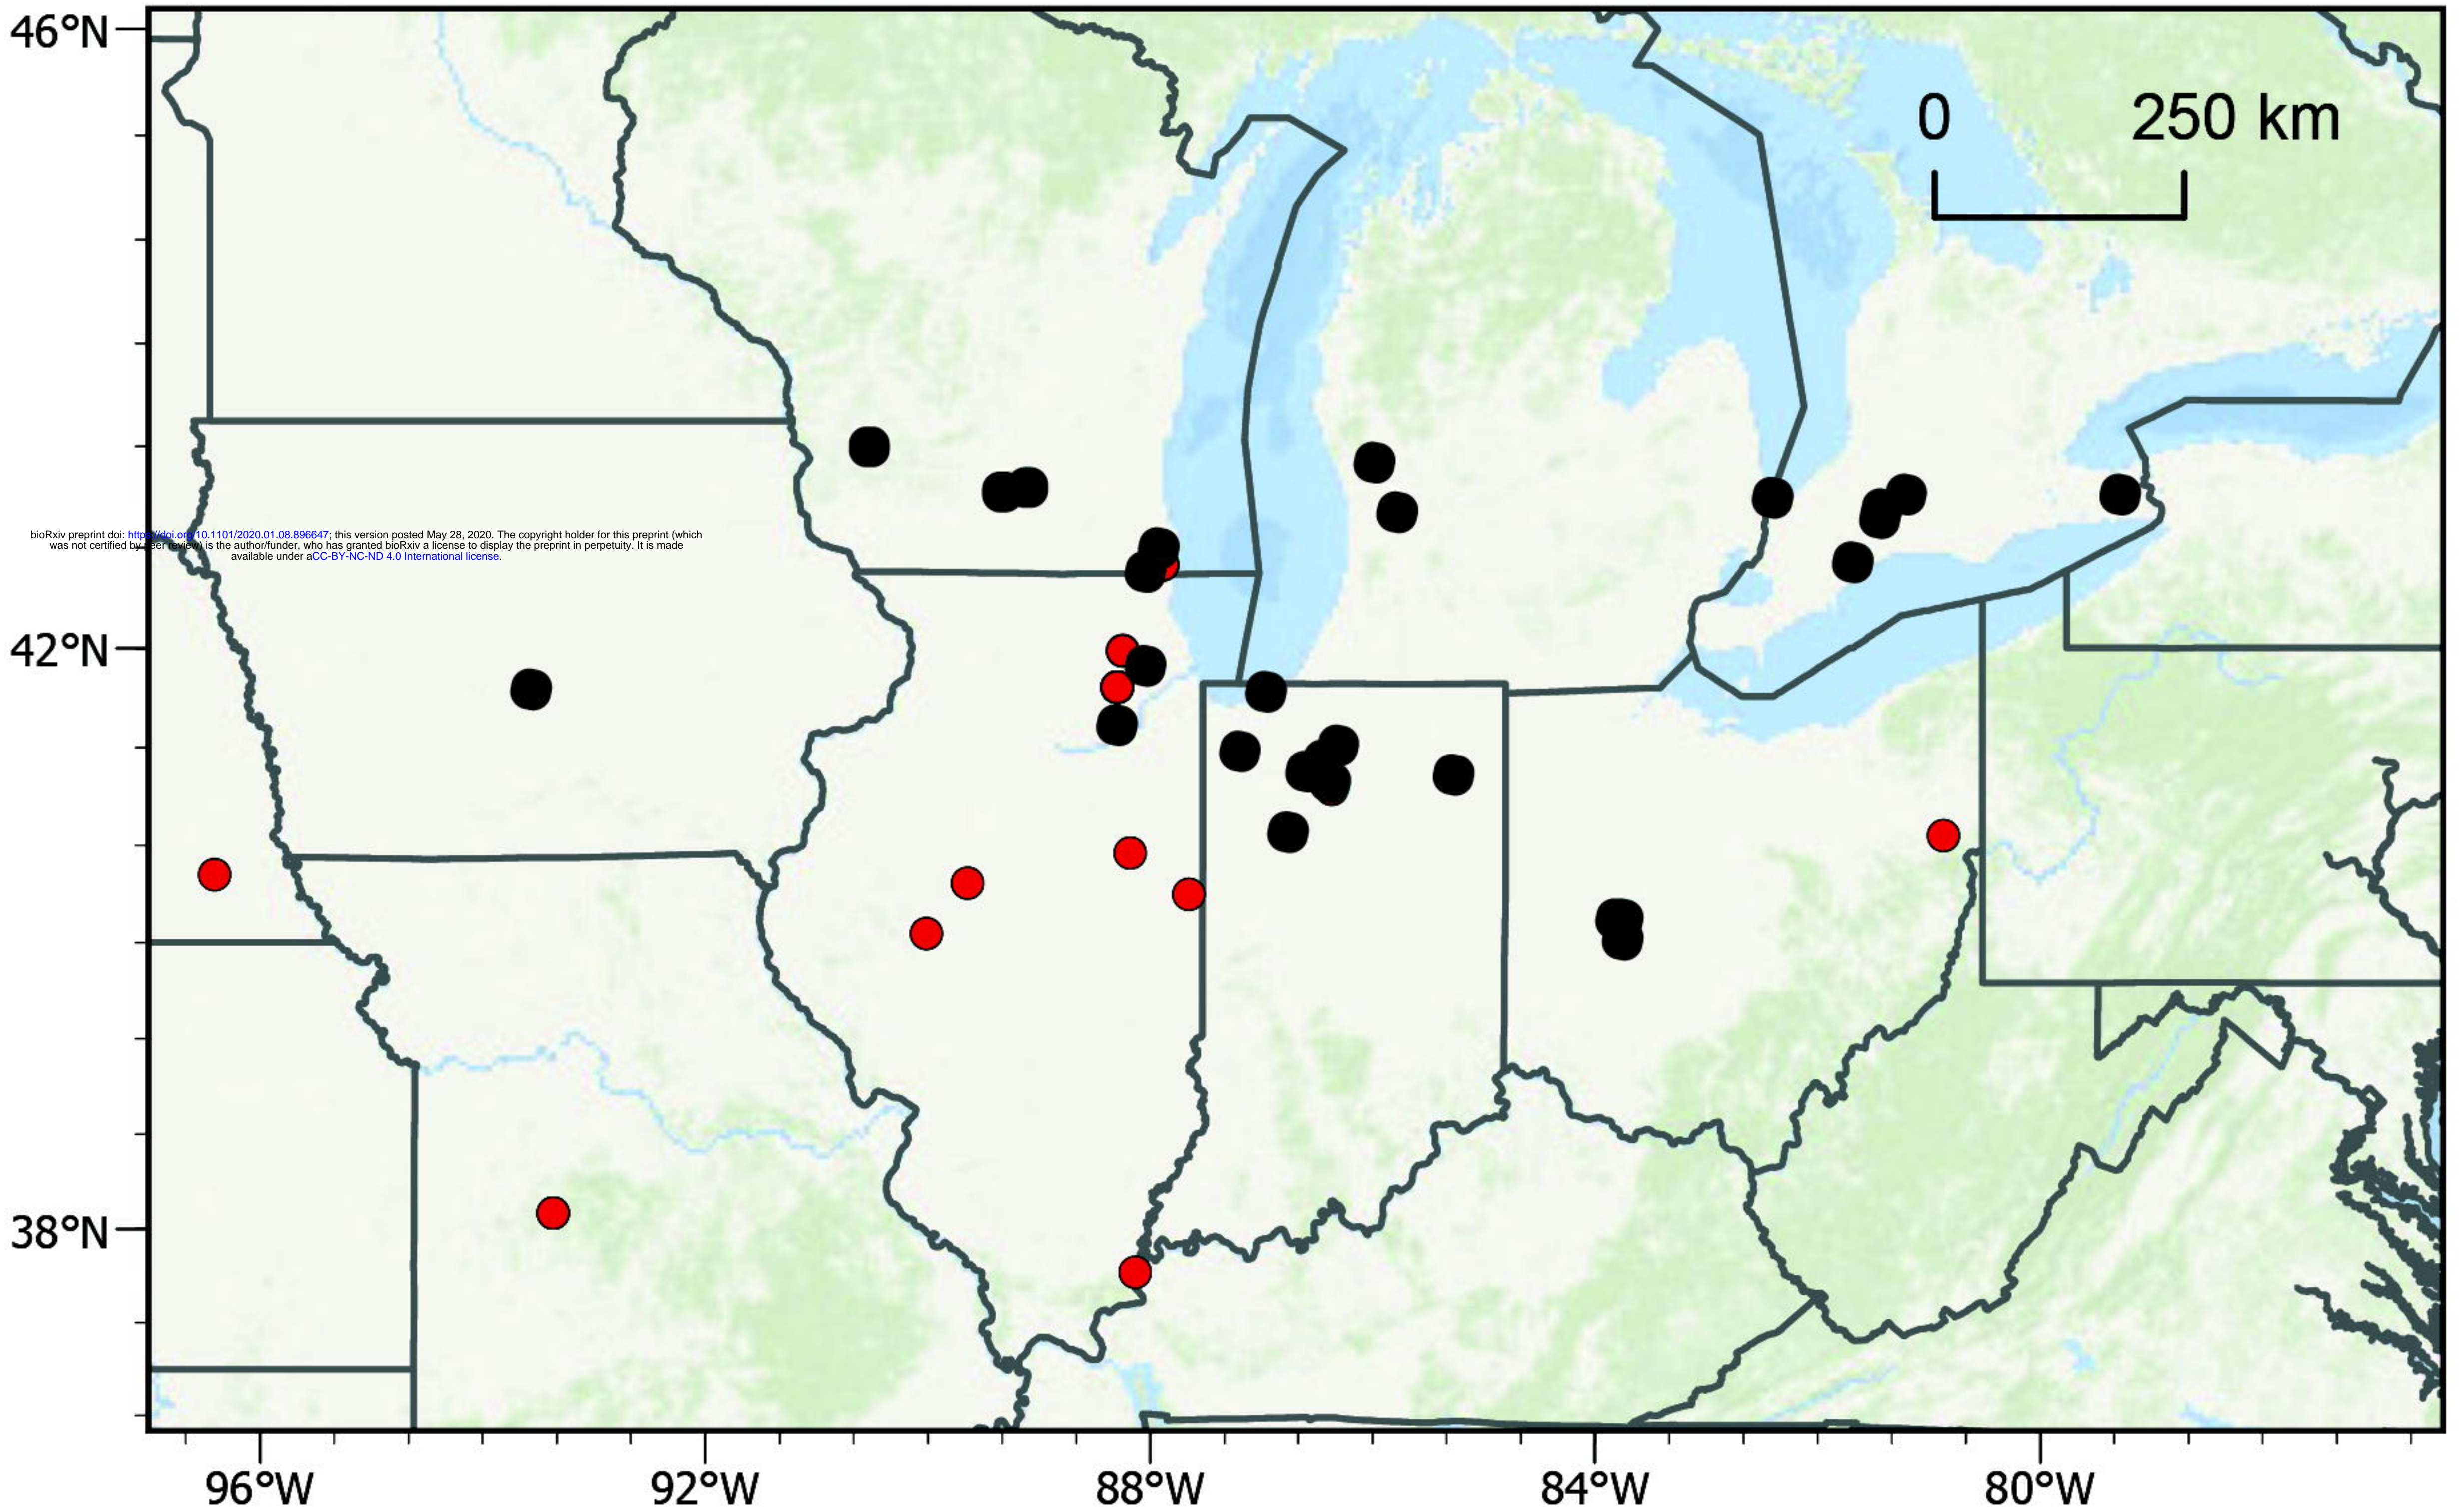

Source: https://www.biorxiv.org/content/10.1101/2020.01.08.896647v2.full.pdf
